# Supplementary material for: Metabolomic Analysis of the Response of Haloxylon ammodendron and Haloxylon persicum to Drought
Source: MDPI journal article supplement (doi:10.3390/ijms24109099), 2023-05-22
Supplement: s1 [file Table S1.xlsx]

## Sheet: SS_pos
Key candidate metabolites screened from Haloxylon ammodendron in positive ion mode
ID	Name	Other_name(Kegg_name)	Formula	Molecular Weight	RT [min]	Kegg_ID	KEGG_pathway	HMDB_ID	Lipidmaps_ID	SuperClass(HMDB)	Class(HMDB)	SubClass(HMDB)	CATEGORY(Lipidmaps)	MAIN_CLASS(Lipidmaps)	SUB_CLASS(Lipidmaps)	mzCloud_Results	mzVault_Results	MassList_Results	m/z	FC	log2FC	Pvalue	ROC	VIP	Up.Down
Com_11600_pos	Pseudoephedrine	(+)-Pseudoephedrine; Pseudoephedrine	C10 H15 N O	165.116	3.264	cpd:C02765	map00360 Phenylalanine metabolism;map01100 Metabolic pathways	--	--	--	--	--	--	--	--	No results	No results	Full match	166.123	16.7863	4.06922	1.93201e-11	1	1.51976	up
Com_2115_pos	Bryodulcosigenin	Bryodulcosigenin	C30 H50 O4	496.356	12.311	cpd:C08789	--	--	--	--	--	--	--	--	--	No results	Invalid mass	No results	497.363	29.3946	4.87748	6.68752e-11	1	1.5178	up
Com_3268_pos	Gallic acid trimethyl ether	--	C10 H12 O5	212.069	7.534	--	--	HMDB0033839	--	Benzenoids	Benzene and substituted derivatives	Benzoic acids and derivatives	--	--	--	No results	Full match	Full match	213.076	5.50162	2.45986	4.27186e-10	1	1.51305	up
Com_1116_pos	3,5,7-trihydroxy-2-phenyl-4H-chromen-4-one	--	C15 H10 O5	270.056	9.888	--	--	HMDB0029521	--	Phenylpropanoids and polyketides	Flavonoids	Flavones	--	--	--	Invalid mass	No results	No results	271.064	4.52607	2.17826	9.00438e-10	1	1.5111	up
Com_1104_pos	Adenosine	Adenosine	C10 H13 N5 O4	267.097	3.108	cpd:C00212	map00230 Purine metabolism;map01100 Metabolic pathways	HMDB0000050	--	Nucleosides, nucleotides, and analogues	Purine nucleosides	_	--	--	--	Full match	Full match	Full match	268.104	98.9986	6.62934	1.25972e-09	1	1.52032	up
Com_7273_pos	3,5-Dimethoxybenzoic acid	--	C9 H10 O4	182.058	8.065	--	--	HMDB0127495	--	Benzenoids	Benzene and substituted derivatives	Benzoic acids and derivatives	--	--	--	Full match	Full match	Full match	183.066	3.02399	1.59645	7.57751e-09	1	1.5034	up
Com_789_pos	Phenylglyoxylic acid	alpha-Oxo-benzeneacetic acid; Benzoylformate; Benzoylformic acid; Phenylglyoxylic acid; Phenylglyoxylate; 2-Oxo-2-phenylacetate	C8 H6 O3	150.032	8.218	cpd:C02137	map00360 Phenylalanine metabolism	HMDB0001587	--	Benzenoids	Benzene and substituted derivatives	Benzoyl derivatives	--	--	--	No results	No results	Full match	151.039	4.15589	2.05516	1.35057e-07	1	1.49463	up
Com_17548_pos	Neohesperidin dihydrochalcone	--	C28 H36 O15	612.202	11.17	--	--	HMDB0030542	--	Phenylpropanoids and polyketides	Flavonoids	Flavonoid glycosides	--	--	--	Invalid mass	No results	No results	613.209	3.53316	1.82096	4.29994e-07	1	1.48001	up
Com_11084_pos	Diosmetin	Diosmetin; Luteolin 4'-methyl ether	C16 H12 O6	300.064	10.177	cpd:C10038	--	HMDB0029676	LMPK12110824	Phenylpropanoids and polyketides	Flavonoids	O-methylated flavonoids	Polyketides [PK]	Flavonoids [PK12]	Flavones and Flavonols [PK1211]	Full match	Full match	Full match	301.071	3.20759	1.68149	5.60168e-07	1	1.47176	up
Com_3588_pos	Triptolide	Triptolide	C20 H24 O6	360.158	9.086	cpd:C09204	--	HMDB0038459	--	Organoheterocyclic compounds	Bi- and oligothiophenes	_	--	--	--	Full match	No results	Full match	361.165	8.35865	3.06327	7.7452e-07	1	1.49483	up
Com_10507_pos	Hesperetin	Hesperetin; 3',5,7-Trihydroxy-4'-methoxyflavanone	C16 H14 O6	302.08	8.659	cpd:C01709	map00941 Flavonoid biosynthesis	HMDB0005782	LMPK12140003	Phenylpropanoids and polyketides	Flavonoids	O-methylated flavonoids	Polyketides [PK]	Flavonoids [PK12]	Flavanones [PK1214]	Full match	Full match	Full match	303.088	3.62101	1.85639	8.57231e-07	1	1.46744	up
Com_1447_pos	Caffeic aldehyde	Caffeic aldehyde; 3,4-Dihydroxycinnamaldehyde; Caffeyl aldehyde	C9 H8 O3	164.048	8.989	cpd:C10945	map00940 Phenylpropanoid biosynthesis;map01110 Biosynthesis of secondary metabolites	HMDB0141767	--	Phenylpropanoids and polyketides	Cinnamaldehydes	_	--	--	--	No results	No results	Full match	165.055	5.1346	2.36025	2.13709e-06	1	1.49282	up
Com_4231_pos	Vitexin	Vitexin; Apigenin 8-C-glucoside	C21 H20 O10	432.106	9.13	cpd:C01460	map00941 Flavonoid biosynthesis;map00944 Flavone and flavonol biosynthesis	--	LMPK12110194	--	--	--	Polyketides [PK]	Flavonoids [PK12]	Flavones and Flavonols [PK1211]	Full match	Full match	Full match	433.114	6.56177	2.71409	0.000106955	1	1.37055	up
Com_352_pos	1,2-Benzenedicarboxylic acid	Phthalate; o-Phthalic acid; 1,2-Benzenedicarboxylic acid	C8 H6 O4	166.027	15.68	cpd:C01606	map01100 Metabolic pathways;map02010 ABC transporters	HMDB0002107	--	Benzenoids	Benzene and substituted derivatives	Benzoic acids and derivatives	--	--	--	No results	No results	Full match	167.034	8.68547	3.1186	0.000137133	1	1.42527	up
Com_12080_pos	Gossypol	Gossypol	C30 H30 O8	518.195	9.446	cpd:C07667	map00909 Sesquiterpenoid and triterpenoid biosynthesis;map01110 Biosynthesis of secondary metabolites	HMDB0040723	LMPR0103330002	Lipids and lipid-like molecules	Prenol lipids	Sesquiterpenoids	Prenol Lipids [PR]	Isoprenoids [PR01]	C15 isoprenoids (sesquiterpenes) [PR0103]	No results	No results	Full match	536.229	3.43798	1.78156	0.000380049	1	1.37884	up

## Sheet: SS_neg
Key candidate metabolites screened from Haloxylon ammodendron in negative ion mode
ID	Name	Other_name(Kegg_name)	Formula	Molecular Weight	RT [min]	Kegg_ID	KEGG_pathway	HMDB_ID	Lipidmaps_ID	SuperClass(HMDB)	Class(HMDB)	SubClass(HMDB)	CATEGORY(Lipidmaps)	MAIN_CLASS(Lipidmaps)	SUB_CLASS(Lipidmaps)	mzCloud_Results	mzVault_Results	MassList_Results	m/z	FC	log2FC	Pvalue	ROC	VIP	Up.Down
Com_106_neg	Chikusetsu saponin IVa	--	C42 H66 O14	794.446	12.425	--	--	HMDB0038778	--	_	_	_	--	--	--	No results	Full match	Full match	793.439	15.9116	3.992	6.07004e-19	1	1.30982	up
Com_10750_neg	Dodecanedioic acid	Dodecanedioic acid	C12 H22 O4	230.152	8.608	cpd:C02678	--	HMDB0000623	LMFA01170009	Lipids and lipid-like molecules	Fatty Acyls	Fatty acids and conjugates	Fatty Acyls [FA]	Fatty Acids and Conjugates [FA01]	Dicarboxylic acids [FA0117]	Full match	No results	Full match	229.145	7.4966	2.90624	3.7247e-11	1	1.30567	up
Com_888_neg	4-Hydroxyphenylpyruvic acid	--	C9 H8 O4	180.043	9.566	--	--	HMDB0000707	--	Benzenoids	Benzene and substituted derivatives	Phenylpyruvic acid derivatives	--	--	--	Full match	Full match	Full match	179.035	3.61683	1.85472	4.71668e-11	1	1.30761	up
Com_5600_neg	Naringenin	Naringenin; 4',5,7-Trihydroxyflavanone; (2S)-Naringenin; (-)-(2S)-Naringenin	C15 H12 O5	272.069	10.826	cpd:C00509	map00941 Flavonoid biosynthesis;map00943 Isoflavonoid biosynthesis;map01100 Metabolic pathways;map01110 Biosynthesis of secondary metabolites	HMDB0002670	LMPK12140001	Phenylpropanoids and polyketides	Flavonoids	Flavans	Polyketides [PK]	Flavonoids [PK12]	Flavanones [PK1214]	Full match	Full match	Full match	271.062	4.80744	2.26527	1.1687e-10	1	1.30796	up
Com_17571_neg	S-Sulfo-L-cysteine	S-Sulfo-L-cysteine	C3 H7 N O5 S2	200.977	1.288	cpd:C05824	map00270 Cysteine and methionine metabolism;map01230 Biosynthesis of amino acids	HMDB0000731	--	Organic acids and derivatives	Carboxylic acids and derivatives	Amino acids, peptides, and analogues	--	--	--	No results	No results	Full match	199.97	3.17646	1.66742	2.77896e-10	1	1.2995	up
Com_20494_neg	Nomilin	Nomilin	C28 H34 O9	514.223	11.805	cpd:C08773	--	HMDB0035772	--	Lipids and lipid-like molecules	Prenol lipids	Triterpenoids	--	--	--	No results	No results	Full match	513.215	4.04999	2.01792	1.13604e-07	1	1.30229	up
Com_15013_neg	Farnesyl pyrophosphate	trans,trans-Farnesyl diphosphate; Farnesyl diphosphate; Farnesyl pyrophosphate; 2-trans,6-trans-Farnesyl diphosphate; (2E,6E)-Farnesyl diphosphate	C15 H28 O7 P2	382.13	10.874	cpd:C00448	map00100 Steroid biosynthesis;map00900 Terpenoid backbone biosynthesis;map00906 Carotenoid biosynthesis;map00909 Sesquiterpenoid and triterpenoid biosynthesis;map01100 Metabolic pathways;map01110 Biosynthesis of secondary metabolites	HMDB0000961	LMPR0103010002	Lipids and lipid-like molecules	Prenol lipids	Sesquiterpenoids	Prenol Lipids [PR]	Isoprenoids [PR01]	C15 isoprenoids (sesquiterpenes) [PR0103]	Full match	No results	No results	381.123	12.1058	3.59763	3.66832e-07	1	1.30047	up
Com_3507_neg	Carminic acid	Carmine; Carminic acid	C22 H20 O13	492.095	9.034	cpd:C11254	--	HMDB0030658	--	Benzenoids	Anthracenes	Anthracenecarboxylic acids and derivatives	--	--	--	Invalid mass	No results	No results	491.087	4.36651	2.12648	5.39679e-07	1	1.29734	up
Com_7873_neg	Oleuropein	Oleuropein	C25 H32 O13	540.186	9.867	cpd:C09794	--	HMDB0035872	--	Lipids and lipid-like molecules	Prenol lipids	Terpene glycosides	--	--	--	No results	No results	Full match	1079.36	3.806	1.92827	8.00054e-07	1	1.26312	up
Com_6078_neg	Chrysin	Chrysin; 5,7-Dihydroxyflavone	C15 H10 O4	254.058	10.555	cpd:C10028	map00941 Flavonoid biosynthesis	HMDB0036619	LMPK12110189	Phenylpropanoids and polyketides	Flavonoids	Flavones	Polyketides [PK]	Flavonoids [PK12]	Flavones and Flavonols [PK1211]	Full match	No results	Full match	253.051	3.02206	1.59553	3.86832e-05	1	1.26863	up
Com_7231_neg	Geniposidic acid	Geniposidic acid	C16 H22 O10	374.122	7.716	cpd:C11673	map00902 Monoterpenoid biosynthesis;map01110 Biosynthesis of secondary metabolites	HMDB0034942	--	Lipids and lipid-like molecules	Prenol lipids	Terpene glycosides	--	--	--	Full match	No results	Full match	373.115	3.33509	1.73772	0.000189085	1	1.16999	up
Com_2098_neg	Eriodictyol-7-O-glucoside	--	C21 H22 O11	450.117	9.246	--	--	HMDB0029544	--	Phenylpropanoids and polyketides	Flavonoids	Flavonoid glycosides	--	--	--	No results	No results	Full match	449.11	8.63818	3.11073	0.000321787	1	1.21758	up
Com_4928_neg	6''-o-acetylgenistin	--	C23 H22 O11	474.117	7.421	--	--	HMDB0029528	--	Phenylpropanoids and polyketides	Isoflavonoids	Isoflavonoid O-glycosides	--	--	--	No results	No results	Full match	473.109	5.04626	2.33521	0.00166351	1	1.15377	up

## Sheet: BSS_pos
Key candidate metabolites screened from Haloxylon persicum in positive ion mode
ID	Name	Other_name(Kegg_name)	Formula	Molecular Weight	RT [min]	Kegg_ID	KEGG_pathway	HMDB_ID	Lipidmaps_ID	SuperClass(HMDB)	Class(HMDB)	SubClass(HMDB)	CATEGORY(Lipidmaps)	MAIN_CLASS(Lipidmaps)	SUB_CLASS(Lipidmaps)	mzCloud_Results	mzVault_Results	MassList_Results	m/z	FC	log2FC	Pvalue	ROC	VIP	Up.Down
Com_3925_pos	Indole-3-butyric acid	Indolebutyric acid; Indole-3-butyric acid; IBA	C12 H13 N O2	203.095	6.78	cpd:C11284	--	HMDB0002096	--	Organoheterocyclic compounds	Indoles and derivatives	Indoles	--	--	--	Full match	No results	Full match	204.102	28.629	4.8394	5.89105e-16	1	1.22131	up
Com_392_pos	Monocrotaline	Monocrotaline	C16 H23 N O6	325.153	6.811	cpd:C10350	--	HMDB0034363	--	Organoheterocyclic compounds	Pyrrolizines	_	--	--	--	No results	No results	Full match	326.16	355.604	8.47413	7.15925e-16	1	1.22132	up
Com_261_pos	L-Dopa	3,4-Dihydroxy-L-phenylalanine; L-Dopa; 3-Hydroxy-L-tyrosine; L-beta-(3,4-Dihydroxyphenyl)alanine; Levodopa; Dihydroxy-L-phenylalanine	C9 H11 N O4	197.069	1.953	cpd:C00355	map00350 Tyrosine metabolism;map00950 Isoquinoline alkaloid biosynthesis;map00965 Betalain biosynthesis;map01100 Metabolic pathways;map01110 Biosynthesis of secondary metabolites	HMDB0000181	--	Organic acids and derivatives	Carboxylic acids and derivatives	Amino acids, peptides, and analogues	--	--	--	Full match	Full match	Full match	198.076	240.93	7.91247	7.0413e-15	1	1.22149	up
Com_1156_pos	4'-Methoxyacetophenone	--	C9 H10 O2	150.068	8.017	--	--	HMDB0032570	--	Benzenoids	Benzene and substituted derivatives	Acetophenones	--	--	--	Full match	No results	Full match	151.076	13.6243	3.76811	5.49507e-14	1	1.22139	up
Com_4403_pos	Gallic acid trimethyl ether	--	C10 H12 O5	212.069	8.746	--	--	HMDB0033839	--	Benzenoids	Benzene and substituted derivatives	Benzoic acids and derivatives	--	--	--	No results	Full match	Full match	213.076	7.38956	2.88549	7.41317e-13	1	1.2196	up
Com_911_pos	Dihydromethysticin	Dihydromethysticin	C15 H16 O5	276.1	8.424	cpd:C09926	--	HMDB0030791	--	Phenylpropanoids and polyketides	Kavalactones	_	--	--	--	Full match	No results	Full match	277.107	23.2933	4.54184	3.67126e-12	1	1.22107	up
Com_1810_pos	3,4-Dihydroxybenzaldehyde	3,4-Dihydroxybenzaldehyde; Protocatechualdehyde	C7 H6 O3	138.032	1.945	cpd:C16700	map00950 Isoquinoline alkaloid biosynthesis	--	--	--	--	--	--	--	--	Full match	Full match	Full match	139.039	24.4104	4.60942	7.08084e-12	1	1.22052	up
Com_849_pos	Prunin	Naringenin 7-O-beta-D-glucoside; Prunin	C21 H22 O10	434.119	10.781	cpd:C09099	map00941 Flavonoid biosynthesis	--	LMPK12140237	--	--	--	Polyketides [PK]	Flavonoids [PK12]	Flavanones [PK1214]	Full match	No results	Full match	435.127	4.17825	2.0629	1.8217e-11	1	1.21967	up
Com_8875_pos	4-Hydroxy-L-Glutamic Acid	--	C5 H7 N O5	161.033	1.698	--	--	HMDB0002273	--	Organic compounds	Organic acids and derivatives	Carboxylic acids and derivatives	--	--	--	No results	No results	Full match	162.04	4.21694	2.0762	2.1077e-11	1	1.21973	up
Com_2800_pos	Maltopentaose	--	C30 H52 O26	850.252	8.942	--	--	HMDB0012254	--	Organic oxygen compounds	Organooxygen compounds	Carbohydrates and carbohydrate conjugates	--	--	--	Invalid mass	No results	No results	851.259	41.6458	5.3801	5.73166e-11	1	1.22158	up
Com_170_pos	Isorhamnetin	Isorhamnetin; 3-Methylquercetin; Quercetin 3'-methyl ether	C16 H12 O7	316.058	10.239	cpd:C10084	--	HMDB0002655	LMPK12110002	Phenylpropanoids and polyketides	Flavonoids	Flavones	Polyketides [PK]	Flavonoids [PK12]	Flavones and Flavonols [PK1211]	Full match	Full match	Full match	317.066	7.59934	2.92587	8.46e-11	1	1.2201	up
Com_17139_pos	Rhein	Rhein	C15 H8 O6	284.033	10.238	cpd:C10401	--	HMDB0032876	LMPK13040015	Benzenoids	Anthracenes	Anthracenecarboxylic acids and derivatives	Polyketides [PK]	Aromatic polyketides [PK13]	Anthracenes and phenanthrenes [PK1304]	No results	No results	Full match	285.04	8.89285	3.15265	1.61906e-09	1	1.20953	up
Com_1064_pos	Kojic acid	Kojic acid; 5-Hydroxy-2-(hydroxymethyl)-4-pyrone	C6 H6 O4	142.027	4.116	cpd:C14516	--	HMDB0032923	--	Organoheterocyclic compounds	Pyrans	Pyranones and derivatives	--	--	--	Full match	No results	Full match	143.034	14.0042	3.80779	3.64329e-09	1	1.22017	up
Com_13265_pos	Coniferin	Coniferin	C16 H22 O8	364.114	7.702	cpd:C00761	map00940 Phenylpropanoid biosynthesis	HMDB0013682	--	Organooxygen compounds	Carbohydrates and carbohydrate conjugates	Glycosyl compounds	--	--	--	Invalid mass	No results	No results	365.121	5.55806	2.47458	5.27216e-09	1	1.21407	up
Com_11742_pos	Folinic acid	Folinic acid; Leucovorin; 5-Formyltetrahydrofolate; L(-)-5-Formyl-5,6,7,8-tetrahydrofolic acid	C20 H23 N7 O7	473.168	6.597	cpd:C03479	map00670 One carbon pool by folate;map01100 Metabolic pathways	HMDB0001562	--	Organoheterocyclic compounds	Pteridines and derivatives	Pterins and derivatives	--	--	--	Full match	No results	Full match	474.175	64.2119	6.00477	7.67624e-09	1	1.20292	up
Com_2303_pos	L-aspartic Acid	--	C4 H7 N O4	133.038	1.332	--	--	HMDB0000191	--	Organic acids and derivatives	Carboxylic acids and derivatives	Amino acids, peptides, and analogues	--	--	--	No results	No results	Full match	134.045	7.59823	2.92566	1.41505e-08	1	1.21665	up
Com_15846_pos	IBA	Indolebutyric acid; Indole-3-butyric acid; IBA	C12 H13 N O2	203.095	7.471	cpd:C11284	--	HMDB0034198	--	Organic nitrogen compounds	Organonitrogen compounds	Amines	--	--	--	No results	No results	Full match	204.102	22.5347	4.49408	8.92359e-08	1	1.2186	up
Com_19253_pos	Sinoacutine	Salutaridine; Sinoacutine; 5,6,8,14-Tetradehydro-4-hydroxy-3,6-dimethoxy-17-methyl-morphinan-7-one	C19 H21 N O4	327.147	10.69	cpd:C05179	map00950 Isoquinoline alkaloid biosynthesis;map01100 Metabolic pathways;map01110 Biosynthesis of secondary metabolites	--	--	--	--	--	--	--	--	No results	No results	Full match	328.155	7.22051	2.8521	1.51354e-07	1	1.2025	up
Com_6912_pos	Berberine	Berberine; Umbellatine	C20 H18 N O4	336.125	10.247	cpd:C00757	map00950 Isoquinoline alkaloid biosynthesis;map01110 Biosynthesis of secondary metabolites	HMDB0003409	--	Alkaloids and derivatives	Protoberberine alkaloids and derivatives	_	--	--	--	No results	No results	Full match	337.132	13.0561	3.70666	2.80953e-06	1	1.2104	up
Com_678_pos	2-Phenylglycine	--	C8 H9 N O2	151.064	1.947	--	--	HMDB0002210	--	Organic acids and derivatives	Carboxylic acids and derivatives	Amino acids, peptides, and analogues	--	--	--	Full match	Full match	Full match	152.071	51.8298	5.69571	1.83929e-05	1	1.19789	up
Com_8123_pos	Yangonin	Yangonin; 4-Methoxy-6-[2-(4-methoxyphenyl)ethenyl]-2H-pyran-2-one	C15 H14 O4	258.089	7.634	cpd:C09980	--	HMDB0034144	--	Phenylpropanoids and polyketides	Kavalactones	_	--	--	--	No results	No results	Full match	259.097	19.4793	4.28387	0.000124611	1	1.1284	up
Com_15090_pos	Isoquercitrin	Quercetin 3-O-glucoside; Isoquercitrin; 2-(3,4-Dihidroxyphenyl)-3-(beta-D-glucofuranosyloxy)-5,7-dihydroxy-4H-1-benzopyran-4-one; Isotrifoliin	C21 H20 O12	442.112	8.275	cpd:C05623	map00944 Flavone and flavonol biosynthesis;map01100 Metabolic pathways;map01110 Biosynthesis of secondary metabolites	HMDB0037362	LMPK12112086	Phenylpropanoids and polyketides	Flavonoids	Flavonoid glycosides	Polyketides [PK]	Flavonoids [PK12]	Flavones and Flavonols [PK1211]	No results	Invalid mass	No results	443.119	4.26496	2.09253	0.000124967	1	1.14129	up
Com_653_pos	1-Aminocyclohexanecarboxylic acid	--	C7 H13 N O2	143.095	1.759	--	--	HMDB0038249	--	Lipids and lipid-like molecules	Prenol lipids	Monoterpenoids	--	--	--	Full match	No results	Full match	144.102	4.67004	2.22344	0.00124214	1	1.03007	up
Com_2278_pos	Isorhapontigenin	--	C15 H14 O4	258.09	8.424	--	--	HMDB0128522	--	Phenylpropanoids and polyketides	Stilbenes	_	--	--	--	Full match	Full match	Full match	259.097	4.16767	2.05924	0.00402724	1	1.02744	up

## Sheet: BSS_neg
Key candidate metabolites screened from Haloxylon persicum in negative ion mode
ID	Name	Other_name(Kegg_name)	Formula	Molecular Weight	RT [min]	Kegg_ID	KEGG_pathway	HMDB_ID	Lipidmaps_ID	SuperClass(HMDB)	Class(HMDB)	SubClass(HMDB)	CATEGORY(Lipidmaps)	MAIN_CLASS(Lipidmaps)	SUB_CLASS(Lipidmaps)	mzCloud_Results	mzVault_Results	MassList_Results	m/z	FC	log2FC	Pvalue	ROC	VIP	Up.Down
Com_3366_neg	2-Isopropylmalic acid	alpha-Isopropylmalate; (2S)-2-Isopropylmalate; (2S)-2-Hydroxy-2-isopropylsuccinic acid; 2-Isopropylmalic acid; 3-Carboxy-3-hydroxy-4-methylpentanoate; 3-Carboxy-3-hydroxyisocaproate	C7 H12 O5	176.069	1.737	cpd:C02504	map00290 Valine, leucine and isoleucine biosynthesis;map00620 Pyruvate metabolism;map01100 Metabolic pathways;map01110 Biosynthesis of secondary metabolites;map01210 2-Oxocarboxylic acid metabolism;map01230 Biosynthesis of amino acids	HMDB0000402	--	Lipids and lipid-like molecules	Fatty Acyls	Fatty acids and conjugates	--	--	--	Full match	Full match	Full match	175.062	14.0065	3.80803	1.65518e-17	1	1.19964	up
Com_563_neg	Pelargonidin chloride	Pelargonidin; 3,5,7-Trihydroxy-2-(4-hydroxyphenyl)benzopyrylium chloride; 3,4',5,7-Tetrahydroxyflavylium chloride; Pelargonidin chloride; Pelargonidol chloride	C15 H11 Cl O5	306.031	1.313	cpd:C05904	map00941 Flavonoid biosynthesis;map00942 Anthocyanin biosynthesis;map01100 Metabolic pathways;map01110 Biosynthesis of secondary metabolites	--	--	--	--	--	--	--	--	No results	No results	Full match	305.024	6.52506	2.70599	7.07934e-17	1	1.19956	up
Com_412_neg	N-Feruloyltyramine	N-Feruloyltyramine; trans-N-Feruloyltyramine	C18 H19 N O4	313.132	10.112	cpd:C02717	--	HMDB0029365	--	Benzenoids	Phenols	Methoxyphenols	--	--	--	No results	No results	Full match	312.124	7.41866	2.89116	1.19433e-12	1	1.19966	up
Com_22020_neg	Pseudoprotodioscin	Pseudoprotodioscin	C51 H82 O21	1030.54	12.016	cpd:C17469	--	--	LMST01070009	--	--	--	Sterol Lipids [ST]	Sterols [ST01]	Furostanols and derivatives [ST0107]	No results	No results	Full match	514.262	4.3789	2.13057	1.96862e-12	1	1.19648	up
Com_14804_neg	N-Acetyl-L-Tyrosine	--	C11 H13 N O4	223.085	1.512	--	--	HMDB0000866	--	Organic acids and derivatives	Carboxylic acids and derivatives	Amino acids, peptides, and analogues	--	--	--	No results	No results	Full match	222.078	6.16279	2.62358	5.5456e-12	1	1.19589	up
Com_1627_neg	Coniferyl alcohol	Coniferyl alcohol; Coniferol; 4-(3-Hydroxy-1-propenyl)-2-methoxyphenol; trans-Coniferyl alcohol	C10 H12 O3	180.079	7.355	cpd:C00590	map00940 Phenylpropanoid biosynthesis;map01100 Metabolic pathways;map01110 Biosynthesis of secondary metabolites	HMDB0012915	--	Benzenoids	Phenols	Methoxyphenols	--	--	--	No results	Full match	Full match	179.072	4.31338	2.10882	3.02734e-11	1	1.1984	up
Com_1362_neg	Celastrol	--	C29 H38 O4	450.275	14.751	--	--	HMDB0002385	--	Lipids and lipid-like molecules	Prenol lipids	Triterpenoids	--	--	--	No results	No results	Full match	449.268	6.97501	2.8022	5.0748e-11	1	1.19858	up
Com_17967_neg	D-Ribulose 1,5-bisphosphate	D-Ribulose 1,5-bisphosphate	C5 H12 O11 P2	309.986	1.317	cpd:C01182	map00630 Glyoxylate and dicarboxylate metabolism;map00710 Carbon fixation in photosynthetic organisms;map01100 Metabolic pathways;map01110 Biosynthesis of secondary metabolites;map01200 Carbon metabolism	--	--	--	--	--	--	--	--	No results	No results	Full match	618.964	13.5792	3.76333	1.91274e-10	1	1.19851	up
Com_18620_neg	Acetylcysteine	Acetylcysteine; N-Acetyl-L-cysteine	C5 H9 N O3 S	163.031	7.277	cpd:C06809	--	HMDB0000574	--	Organic acids and derivatives	Carboxylic acids and derivatives	Amino acids, peptides, and analogues	--	--	--	No results	No results	Full match	162.023	5.08352	2.34583	2.30835e-10	1	1.19578	up
Com_6777_neg	Glutathione	Glutathione; 5-L-Glutamyl-L-cysteinylglycine; N-(N-gamma-L-Glutamyl-L-cysteinyl)glycine; gamma-L-Glutamyl-L-cysteinyl-glycine; GSH; Reduced glutathione	C10 H17 N3 O6 S	307.085	9.159	cpd:C00051	map00270 Cysteine and methionine metabolism;map00480 Glutathione metabolism;map01100 Metabolic pathways;map02010 ABC transporters	HMDB0000125	--	Organic acids and derivatives	Carboxylic acids and derivatives	Amino acids, peptides, and analogues	--	--	--	No results	No results	Full match	306.078	38.2474	5.25729	2.48838e-10	1	1.19927	up
Com_166_neg	Allantoin	Allantoin; 5-Ureidohydantoin; Glyoxyldiureide	C4 H6 N4 O3	158.044	1.406	cpd:C01551	--	HMDB0000462	--	Organoheterocyclic compounds	Azoles	Imidazoles	--	--	--	No results	Full match	Full match	157.037	4.42855	2.14683	2.65525e-10	1	1.19753	up
Com_13992_neg	Agnuside	Agnuside	C22 H26 O11	466.151	6.79	cpd:C09765	--	HMDB0036561	--	Lipids and lipid-like molecules	Prenol lipids	Terpene glycosides	--	--	--	Invalid mass	No results	No results	465.144	10.1651	3.34555	3.30235e-10	1	1.19514	up
Com_5873_neg	Uridine 5'-monophosphate	UMP; Uridylic acid; Uridine monophosphate; Uridine 5'-monophosphate; 5'Uridylic acid	C9 H13 N2 O9 P	324.036	1.514	cpd:C00105	map00240 Pyrimidine metabolism;map01100 Metabolic pathways	HMDB0000288	--	Nucleosides, nucleotides, and analogues	Pyrimidine nucleotides	Pyrimidine ribonucleotides	--	--	--	No results	No results	Full match	323.029	4.52358	2.17747	8.59007e-09	1	1.18099	up
Com_1969_neg	Carminic acid	Carmine; Carminic acid	C22 H20 O13	492.094	8.723	cpd:C11254	--	HMDB0030658	--	Benzenoids	Anthracenes	Anthracenecarboxylic acids and derivatives	--	--	--	Invalid mass	No results	No results	491.087	127.228	6.99127	1.268e-08	1	1.18938	up
Com_3348_neg	myricetin 3-O-beta-D-galactopyranoside	--	C21 H20 O13	480.095	7.798	--	--	HMDB0034358	--	Phenylpropanoids and polyketides	Flavonoids	Flavonoid glycosides	--	--	--	Invalid mass	No results	No results	479.087	19.2353	4.26569	1.66484e-08	1	1.19731	up
Com_29936_neg	Cyclic AMP	3',5'-Cyclic AMP; Cyclic adenylic acid; Cyclic AMP; Adenosine 3',5'-phosphate; Adenosine 3',5'-cyclic phosphate; cAMP	C10 H12 N5 O6 P	329.053	5.997	cpd:C00575	map00230 Purine metabolism	HMDB0000058	--	Nucleosides, nucleotides, and analogues	Purine nucleotides	Cyclic purine nucleotides	--	--	--	No results	No results	Full match	328.046	8.79384	3.13649	1.28637e-07	1	1.19527	up
Com_13110_neg	Steviolbioside	--	C32 H50 O13	642.327	12.275	--	--	HMDB0036707	--	Lipids and lipid-like molecules	Prenol lipids	Terpene glycosides	--	--	--	No results	No results	Full match	641.319	6.04908	2.59672	5.80102e-07	1	1.18627	up
Com_1237_neg	Isomaltose	Isomaltose; Brachiose	C12 H22 O11	342.115	9.052	cpd:C00252	map00500 Starch and sucrose metabolism	HMDB0002923	--	Organic oxygen compounds	Organooxygen compounds	Carbohydrates and carbohydrate conjugates	--	--	--	No results	No results	Full match	341.108	142.636	7.1562	9.4657e-07	1	1.19198	up
Com_10933_neg	Elaidic acid	(9E)-Octadecenoic acid; 9-Octadecenoic acid, (E)-; (E)-Oleic acid; D9-trans-Octadecenoic acid; 9-trans-Octadecenoic acid; trans-D9-Octadecenoic acid; trans-9-Octadecenoic acid; trans-Elaidic acid; trans-Oleic acid; Elaidic acid; Acide elaidique; Elaidinsaure	C18 H34 O2	282.256	14.741	cpd:C01712	--	HMDB0000573	--	Lipids and lipid-like molecules	Fatty Acyls	Fatty acids and conjugates	--	--	--	Full match	No results	Full match	281.249	5.22036	2.38415	2.48711e-06	1	1.18678	up
Com_1307_neg	Vanillactic acid	--	C10 H12 O5	212.069	8.285	--	--	HMDB0000913	--	Phenylpropanoids and polyketides	Phenylpropanoic acids	_	--	--	--	No results	No results	Full match	211.062	53.1143	5.73103	2.98039e-06	1	1.18868	up
Com_6265_neg	Galacturonic acid	Galacturonic acid	C6 H10 O7	388.087	6.823	cpd:C08348	--	HMDB0002545	--	Organic oxygen compounds	Organooxygen compounds	Carbohydrates and carbohydrate conjugates	--	--	--	Invalid mass	No results	No results	193.036	21.0026	4.39249	1.30189e-05	1	1.15914	up
Com_14321_neg	LPA 16:0	--	C19 H39 O7 P	410.243	14.638	--	--	--	LMGP10050042	--	--	--	Glycerophospholipids [GP]	Glycerophosphates [GP10]	Monoacylglycerophosphates [GP1005]	No results	Full match	Full match	409.235	4.00399	2.00144	1.78695e-05	1	1.15883	up
Com_5428_neg	3,6'-Disinapoyl sucrose	--	C34 H42 O19	754.234	9.005	--	--	HMDB0040838	--	Phenylpropanoids and polyketides	Cinnamic acids and derivatives	Hydroxycinnamic acids and derivatives	--	--	--	No results	No results	Full match	753.227	47.2062	5.5609	2.74558e-05	1	1.17233	up
Com_27487_neg	S-Adenosyl-methionine	--	C22 H30 N6 O8 S2	570.159	9.151	--	--	HMDB0001185	--	Nucleosides, nucleotides, and analogues	5'-deoxyribonucleosides	5'-deoxy-5'-thionucleosides	--	--	--	No results	No results	Full match	569.152	5.63155	2.49353	6.63098e-05	1	1.10503	up
Com_1202_neg	Homovanillic acid	Homovanillate; Homovanillic acid; 3-Methoxy-4-hydroxyphenylacetate	C9 H10 O4	182.058	8.412	cpd:C05582	map00350 Tyrosine metabolism;map01100 Metabolic pathways	HMDB0000118	--	Benzenoids	Phenols	Methoxyphenols	--	--	--	Full match	Full match	Full match	181.051	26.976	4.7536	0.000109057	1	1.14799	up
Com_8787_neg	Eleutheroside E	Eleutheroside E	C34 H46 O18	742.269	8.74	cpd:C20786	--	HMDB0036410	--	Lignans, neolignans and related compounds	Lignan glycosides	_	--	--	--	No results	Full match	Full match	741.263	4.34301	2.1187	0.00045961	1	1.10339	up
