# Supplementary material for: Metabolomic Analysis of the Response of Haloxylon ammodendron and Haloxylon persicum to Drought
Source: MDPI journal article supplement (doi:10.3390/ijms24109099), 2023-05-22
Supplement: s1 [file Table S2.xlsx]

## Sheet: LS vs. HS_pos
Differential metabolites in Haloxylon ammodendron under positive ion mode
ID	Name	Formula	Molecular Weight	RT [min]	m/z	mzCloud_Results	mzVault_Results	MassList_Results	FC	log2FC	Pvalue	ROC	VIP	Up/Down
Com_620_pos	5-acetyl-2,6-dimethyl-1,2,3,4-tetrahydropyridin-4-one	C9 H13 N O2	149.084	1.732	150.092	Invalid mass	No results	No match	226.952	7.82624	1.23588e-14	1	1.52506	up
Com_11496_pos	Brucine	C23 H26 N2 O4	394.189	11.275	395.196	No results	No results	Full match	0.105252	-3.24808	3.36826e-14	1	1.52495	down
Com_11600_pos	Pseudoephedrine	C10 H15 N O	165.116	3.264	166.123	No results	No results	Full match	16.7863	4.06922	1.93201e-11	1	1.51976	up
Com_4977_pos	Sodium Houttuyfonate	C14 H27 Na O5 S	330.147	9.122	331.155	No results	No results	Full match	17.8455	4.15749	3.07017e-11	1	1.5186	up
Com_2857_pos	NAT13-331713_POS	C26 H30 N4 O3	484.193	10.645	485.2	Invalid mass	No results	No results	12.1868	3.60724	4.71913e-11	1	1.51811	up
Com_2115_pos	Bryodulcosigenin	C30 H50 O4	496.356	12.311	497.363	No results	Invalid mass	No results	29.3946	4.87748	6.68752e-11	1	1.5178	up
Com_3268_pos	Gallic acid trimethyl ether	C10 H12 O5	212.069	7.534	213.076	No results	Full match	Full match	5.50162	2.45986	4.27186e-10	1	1.51305	up
Com_937_pos	2-[3-(4-pyridyl)-1H-1,2,4-triazol-5-yl]pyridine	C12 H9 N5	223.085	1.943	224.092	Invalid mass	No results	No match	0.177734	-2.49221	4.91977e-10	1	1.5145	down
Com_11171_pos	8,8-dimethyl-2H,8H-pyrano[3,2-g]chromen-2-one	C14 H12 O3	228.079	10.723	229.086	Full match	Full match	Full match	5.8697	2.55329	6.14339e-10	1	1.51202	up
Com_14561_pos	N1-{3-[3-(2,6-dichlorophenyl)isoxazol-5-yl]phenyl}acetamide	C17 H12 Cl2 N2 O2	346.031	5.73	347.038	Invalid mass	No results	No results	0.0934683	-3.41938	6.66796e-10	1	1.51363	down
Com_1116_pos	3,5,7-trihydroxy-2-phenyl-4H-chromen-4-one	C15 H10 O5	270.056	9.888	271.064	Invalid mass	No results	No results	4.52607	2.17826	9.00438e-10	1	1.5111	up
Com_3838_pos	10-Deacetylasperulosidic acid	C16 H22 O11	390.117	7.295	391.124	No results	No results	Full match	0.130732	-2.93531	1.25572e-09	1	1.51328	down
Com_1104_pos	Adenosine	C10 H13 N5 O4	267.097	3.108	268.104	Full match	Full match	Full match	98.9986	6.62934	1.25972e-09	1	1.52032	up
Com_19988_pos	Crebanine	C20 H21 N O4	339.148	10.91	340.155	No results	No results	Full match	0.228797	-2.12786	1.44674e-09	1	1.5098	down
Com_15299_pos	5,7-dihydroxy-3,8-dimethoxy-2-phenyl-4H-chromen-4-one	C17 H14 O6	336.059	11.21	337.067	Invalid mass	No results	No results	0.0603708	-4.05	1.71964e-09	1	1.51912	down
Com_271_pos	Alisol B	C30 H48 O4	472.356	12.387	473.364	No results	No results	Full match	9.23207	3.20665	4.93491e-09	1	1.50959	up
Com_7273_pos	3,5-Dimethoxybenzoic acid	C9 H10 O4	182.058	8.065	183.066	Full match	Full match	Full match	3.02399	1.59645	7.57751e-09	1	1.5034	up
Com_6500_pos	Wogonin	C16 H12 O5	284.069	12.551	285.076	Full match	Full match	Full match	0.424872	-1.2349	8.86e-09	1	1.50394	down
Com_1299_pos	Poricoic acid B	C30 H44 O5	484.32	11.819	485.327	No results	No results	Full match	0.291211	-1.77986	1.10943e-08	1	1.50169	down
Com_416_pos	Kaempferol	C15 H10 O6	286.048	9.454	287.055	Full match	Full match	Full match	0.312312	-1.67894	1.29654e-08	1	1.50422	down
Com_9001_pos	Nodakenetin	C14 H14 O4	246.089	10.723	247.096	No results	No results	Full match	3.9836	1.99407	1.35078e-08	1	1.49968	up
Com_3728_pos	Pterosin G	C14 H18 O3	234.126	10.659	235.133	No results	No results	Full match	3.5587	1.83135	1.6231e-08	1	1.50799	up
Com_2043_pos	ethyl 5-cyano-6-piperazino-2-(trifluoromethyl)nicotinate	C14 H15 F3 N4 O2	328.114	8.818	329.121	Full match	No results	No match	7.39856	2.88724	2.05189e-08	1	1.50789	up
Com_308_pos	Monocrotaline	C16 H23 N O6	325.153	6.81	326.16	No results	No results	Full match	0.300617	-1.734	3.78952e-08	1	1.49399	down
Com_2971_pos	DNH	C14 H20 N6 O7	384.14	7.101	385.147	Full match	No results	No results	4.90793	2.29511	4.34897e-08	1	1.49378	up
Com_4953_pos	N-lactoyl-phenylalanine	C12 H15 N O4	237.1	7.096	238.108	No results	No results	Full match	2.95232	1.56185	4.46372e-08	1	1.49214	up
Com_1470_pos	5,7-dihydroxy-3-(4-hydroxyphenyl)-4H-chromen-4-one	C15 H10 O5	292.039	9.89	293.046	Invalid mass	No results	No results	4.73861	2.24446	5.11879e-08	1	1.49768	up
Com_21854_pos	Pelargonin chloride	C27 H31 Cl O15	630.137	10.933	631.145	No results	No results	Full match	5.72286	2.51674	5.46255e-08	1	1.50721	up
Com_1143_pos	L-Cysteine-glutathione gisulfide	C13 H22 N4 O8 S2	426.088	1.437	427.096	No results	No results	Full match	3.57702	1.83876	5.52816e-08	1	1.49115	up
Com_706_pos	2-acetamido-3-(4-methoxyphenyl)propanoic acid	C12 H15 N O4	237.1	5.819	238.108	Full match	No results	Full match	2.98676	1.57858	5.68489e-08	1	1.49085	up
Com_14593_pos	Clofencet-potassium	C13 H11 Cl N2 O3	278.043	7.547	279.051	Invalid mass	No results	No results	5.0161	2.32657	5.69269e-08	1	1.49156	up
Com_6530_pos	Oroxylin A	C16 H12 O5	284.069	11.904	285.076	No results	No results	Full match	0.47324	-1.07936	5.77845e-08	1	1.49503	down
Com_7874_pos	p-Anisaldehyde	C8 H8 O2	136.052	8.435	295.093	No results	No results	Full match	3.35824	1.74771	6.24126e-08	1	1.48967	up
Com_1014_pos	Salicylic acid	C7 H6 O3	138.032	6.384	139.039	Full match	No results	Full match	2.57581	1.36503	7.24957e-08	1	1.48874	up
Com_10331_pos	Sinoacutine	C19 H21 N O4	327.147	11.007	328.155	No results	No results	Full match	0.26415	-1.92057	8.34962e-08	1	1.4967	down
Com_10934_pos	4-(cyclohexylmethyl)-6-(2-thienyl)-2,3-dihydropyridazin-3-one hydrate	C15 H18 N2 O S	296.093	6.474	297.1	Invalid mass	No results	No results	2.69018	1.4277	1.14699e-07	1	1.48619	up
Com_789_pos	Phenylglyoxylic acid	C8 H6 O3	150.032	8.218	151.039	No results	No results	Full match	4.15589	2.05516	1.35057e-07	1	1.49463	up
Com_10161_pos	ethyl 2-{[2-(4-methoxyphenoxy)-5-nitrobenzoyl]amino}acetate	C18 H18 N2 O7	412.062	7.04	413.069	Invalid mass	No results	No results	4.93881	2.30416	1.41316e-07	1	1.49436	up
Com_142_pos	Kojic acid	C6 H6 O4	142.027	4.092	143.034	Full match	No results	Full match	2.6091	1.38355	1.52524e-07	1	1.48263	up
Com_2623_pos	Isovanillic acid	C8 H8 O4	168.043	7.137	169.05	Full match	Full match	Full match	2.43528	1.28409	1.54013e-07	1	1.48394	up
Com_5647_pos	5-methoxy-2-phenyl-4H-chromen-4-one	C16 H12 O3	290.036	8.379	291.043	Invalid mass	No results	No results	2.96285	1.56698	1.65354e-07	1	1.4988	up
Com_17256_pos	3'-Methoxy Puerarin	C22 H22 O10	446.123	10.982	447.13	No results	No results	Full match	0.224076	-2.15794	1.80637e-07	1	1.48458	down
Com_1221_pos	Ixoside	C16 H20 O11	388.101	7.531	389.108	No results	No results	Full match	6.08774	2.60591	1.93917e-07	1	1.50036	up
Com_5848_pos	AL 8810 Methyl ester	C25 H33 F O4	438.224	11.297	439.231	Invalid mass	No results	No results	0.297496	-1.74906	1.95349e-07	1	1.48181	down
Com_1746_pos	SQH	C14 H22 N6 O6	370.161	8.802	371.168	Full match	No results	No results	0.326055	-1.61681	1.95728e-07	1	1.48661	down
Com_2252_pos	2-[(carboxymethyl)(methyl)amino]-5-methoxybenzoic acid	C11 H13 N O5	239.08	1.505	240.087	Full match	No results	No results	0.361584	-1.4676	2.44621e-07	1	1.47989	down
Com_4862_pos	Temazepam	C16 H13 Cl N2 O2	300.067	8.717	301.074	No results	Full match	No results	0.383491	-1.38274	2.52725e-07	1	1.48081	down
Com_5668_pos	2-{[4-(tert-butyl)-4H-1,2,4-triazol-3-yl]thio}-3-nitropyridine	C11 H13 N5 O2 S	279.075	4.053	280.082	Invalid mass	No results	No results	0.44072	-1.18206	2.78668e-07	1	1.48389	down
Com_3100_pos	3-ethyl-4-hydroxy-1-methyl-1,2-dihydroquinolin-2-one	C12 H13 N O2	203.095	6.787	204.102	Full match	No results	Full match	0.37242	-1.425	2.83387e-07	1	1.47856	down
Com_1405_pos	Linderane	C15 H16 O4	260.105	8.488	261.112	No results	No results	Full match	0.408783	-1.29059	2.95988e-07	1	1.47847	down
Com_9593_pos	Glycyrrhetinic acid	C30 H46 O4	470.34	10.178	453.337	No results	No results	Full match	2.33432	1.22301	3.82414e-07	1	1.47344	up
Com_17548_pos	Neohesperidin dihydrochalcone	C28 H36 O15	612.202	11.17	613.209	Invalid mass	No results	No results	3.53316	1.82096	4.29994e-07	1	1.48001	up
Com_18822_pos	Debromohymenialdisine	C11 H11 N5 O2	267.071	6.447	268.079	Invalid mass	No results	No results	3.03105	1.59982	4.58411e-07	1	1.47172	up
Com_6222_pos	5-Phenyl-2,4-pentadienoic acid	C11 H10 O2	174.068	5.815	175.076	No results	No results	Full match	2.55114	1.35114	5.30722e-07	1	1.46995	up
Com_11084_pos	Diosmetin	C16 H12 O6	300.064	10.177	301.071	Full match	Full match	Full match	3.20759	1.68149	5.60168e-07	1	1.47176	up
Com_277_pos	Trigonelline	C7 H7 N O2	137.048	1.41	138.055	Full match	Full match	Full match	0.426807	-1.22834	5.69192e-07	1	1.47169	down
Com_13386_pos	ANH	C13 H20 N6 O5	340.15	11.686	341.157	Full match	No results	No results	0.190277	-2.39382	5.9573e-07	1	1.47434	down
Com_834_pos	2,4-Dihydroxybenzoic acid	C7 H6 O4	154.027	6.952	155.034	Full match	No results	Full match	1.96127	0.971792	6.55359e-07	1	1.46764	up
Com_10848_pos	4,7,8-trimethoxyfuro[2,3-b]quinoline	C14 H13 N O4	259.085	8.668	260.092	Full match	No results	No results	0.29547	-1.75891	6.97791e-07	1	1.47199	down
Com_8819_pos	N,N-dimethyl-5-nitro-6-[3-(trifluoromethyl)phenoxy]pyrimidin-4-amine	C13 H11 F3 N4 O3	310.073	6.494	311.08	Invalid mass	No results	No results	0.317681	-1.65435	6.98692e-07	1	1.46763	down
Com_3588_pos	Triptolide	C20 H24 O6	360.158	9.086	361.165	Full match	No results	Full match	8.35865	3.06327	7.7452e-07	1	1.49483	up
Com_7279_pos	Nobiletin	C21 H22 O8	402.133	7.884	403.14	No results	No results	Full match	2.60096	1.37904	8.55074e-07	1	1.46616	up
Com_10507_pos	Hesperetin	C16 H14 O6	302.08	8.659	303.088	Full match	Full match	Full match	3.62101	1.85639	8.57231e-07	1	1.46744	up
Com_12475_pos	6-chloro-2,4-diphenyl-8-(trifluoromethyl)-3H-1,5-benzodiazepine	C22 H14 Cl F3 N2	376.102	7.526	377.11	Invalid mass	No results	No results	0.228835	-2.12762	9.87244e-07	1	1.46484	down
Com_3712_pos	tetranor-12(R)-HETE	C16 H26 O3	248.178	13.096	249.185	Invalid mass	No results	No results	9.74166	3.28417	1.00119e-06	1	1.48538	up
Com_2207_pos	Bergapten	C12 H8 O4	216.043	2.131	217.05	No results	No results	Full match	2.71453	1.4407	1.00398e-06	1	1.47491	up
Com_1471_pos	尾-Asarone	C12 H16 O3	208.11	10.104	209.117	Full match	Full match	Full match	1.97224	0.979838	1.17966e-06	1	1.46732	up
Com_3050_pos	2-Arachidonyl Glycerol ether	C23 H40 O3	364.296	15.573	365.303	Full match	No results	No results	1.60732	0.684661	1.19837e-06	1	1.47481	up
Com_7640_pos	N-(1-benzothiophen-2-yl)-N'-(2-methylphenyl)urea	C16 H14 N2 O S	304.062	7.152	305.069	Invalid mass	No results	No results	4.08562	2.03055	1.26752e-06	1	1.47968	up
Com_9919_pos	3-hydroxy-2-octylpentanedioic acid	C13 H24 O5	242.152	12.127	243.16	Invalid mass	No results	No results	2.6163	1.38753	1.32889e-06	1	1.46393	up
Com_7889_pos	N-(1,3-benzodioxol-5-yl)-3,4,5-trimethoxybenzamide	C17 H17 N O6	331.106	6.01	332.113	Full match	No results	No results	2.29259	1.19698	1.39555e-06	1	1.45904	up
Com_597_pos	Dacarbazine	C6 H10 N6 O	182.095	8.442	183.102	No results	Invalid mass	No results	1.97136	0.979188	1.51509e-06	1	1.47381	up
Com_10119_pos	4-Demethylepipodophyllotoxin	C21 H20 O8	400.115	7.075	401.122	No results	No results	Full match	2.80216	1.48654	1.5919e-06	1	1.46307	up
Com_5519_pos	Obscurolide A1	C15 H17 N O5	273.1	8.456	274.108	Invalid mass	No results	No results	0.385022	-1.37699	1.73209e-06	1	1.45913	down
Com_10818_pos	Salvianolic acid A	C26 H22 O10	494.122	8.431	495.13	No results	No results	Full match	0.369386	-1.4368	1.84441e-06	1	1.45512	down
Com_10294_pos	Glutathione	C10 H17 N3 O6 S	307.084	6.577	308.091	No results	No results	Full match	2.52306	1.33517	1.87367e-06	1	1.46826	up
Com_2331_pos	ENH	C15 H22 N6 O7	398.156	10.003	399.163	Full match	No results	No results	2.56082	1.35661	1.9898e-06	1	1.46766	up
Com_5400_pos	Tyramine	C8 H11 N O	137.084	2.576	138.092	No results	No results	Full match	0.405983	-1.30051	2.03601e-06	1	1.45759	down
Com_1447_pos	Caffeic aldehyde	C9 H8 O3	164.048	8.989	165.055	No results	No results	Full match	5.1346	2.36025	2.13709e-06	1	1.49282	up
Com_19809_pos	Taxifolin	C15 H12 O7	304.056	6.024	305.063	Invalid mass	No results	No results	2.9366	1.55415	2.40013e-06	1	1.4624	up
Com_13181_pos	NMH	C15 H24 N6 O5 S	422.137	4.606	423.144	Invalid mass	No results	No results	2.32285	1.2159	2.49122e-06	1	1.44886	up
Com_9870_pos	Methyl gallate	C8 H8 O5	184.037	6.633	185.045	No results	Full match	Full match	0.376869	-1.40786	2.62313e-06	1	1.45877	down
Com_10253_pos	3-[4-methyl-1-(2-methylpropanoyl)-3-oxocyclohexyl]butanoic acid	C15 H24 O4	306.122	9.185	307.129	Invalid mass	No results	No results	2.44637	1.29064	2.82259e-06	1	1.45075	up
Com_4884_pos	5-[4-(phenylsulfonyl)phenyl]-1H-pyrazole	C15 H12 N2 O2 S	306.041	4.095	307.048	Invalid mass	No results	No results	0.460215	-1.11962	3.12398e-06	1	1.44849	down
Com_8947_pos	3-Indoleacetonitrile	C10 H8 N2	156.069	8.094	157.076	Full match	No results	Full match	2.27941	1.18866	3.36576e-06	1	1.44608	up
Com_12828_pos	N-[4-(6-methyl-1,3-benzothiazol-2-yl)phenyl]benzamide	C21 H16 N2 O S	366.073	8.657	367.08	Invalid mass	No results	No results	3.46576	1.79317	3.64095e-06	1	1.4635	up
Com_1963_pos	5,8-dihydroxy-10-methyl-5,8,9,10-tetrahydro-2H-oxecin-2-one	C10 H14 O4	180.079	9.417	181.087	Invalid mass	No match	No match	2.18718	1.12907	3.98666e-06	1	1.44086	up
Com_7317_pos	Tricin 5-O-hexoside derivative	C24 H22 O14	534.102	9.681	535.109	No results	No results	Full match	0.517741	-0.949697	4.05367e-06	1	1.44358	down
Com_12838_pos	Jaceosidin	C17 H14 O7	330.074	9.429	331.081	No results	Full match	Full match	0.387324	-1.36839	4.33633e-06	1	1.44079	down
Com_16358_pos	Ganoderic acid C6	C30 H42 O8	530.287	14.816	531.294	No results	No results	Full match	2.666	1.41468	4.46471e-06	1	1.45901	up
Com_17962_pos	Inosine-5'-monophosphate	C10 H13 N4 O8 P	348.046	3.811	349.054	No results	No results	Full match	2.57843	1.36649	5.03545e-06	1	1.43973	up
Com_13892_pos	ethyl 2-(tert-butyl)-3-chloro-5-cyano-6-morpholinoisonicotinate	C17 H22 Cl N3 O3	351.133	5.726	352.14	Invalid mass	No results	No results	2.91267	1.54234	5.32441e-06	1	1.46962	up
Com_2804_pos	5,6-dimethoxyindan-1-one	C11 H12 O3	192.079	6.507	193.086	Full match	No results	Full match	1.91703	0.93887	5.3402e-06	1	1.43623	up
Com_4573_pos	6,7-Dimethoxy-4-Methylcoumarin	C12 H12 O4	220.074	2.128	221.081	No results	No results	Full match	2.40201	1.26424	5.50781e-06	1	1.43584	up
Com_1428_pos	Acetophenone	C8 H8 O	120.058	8.135	121.065	Full match	Full match	No results	0.500048	-0.999862	5.59265e-06	1	1.44081	down
Com_15795_pos	Rhein 8-Glucoside	C21 H18 O11	446.086	10.21	447.093	No results	No results	Full match	1.94053	0.956453	5.59591e-06	1	1.43578	up
Com_10239_pos	2-[2-(5-bromo-2-pyridyl)diaz-1-enyl]-5-(diethylamino)phenol	C15 H17 Br N4 O	348.064	6.627	349.072	Invalid mass	No results	No results	1.9411	0.956873	5.6269e-06	1	1.43632	up
Com_16920_pos	4-oxo-4-(5,6,7,8-tetrahydronaphthalen-1-ylamino)but-2-enoic acid	C14 H15 N O3	245.106	10.86	246.113	Full match	No results	No results	0.369365	-1.43688	5.65555e-06	1	1.44381	down
Com_10863_pos	3,14-dihydro-15-keto-tetranor Prostaglandin E2	C16 H26 O5	320.16	11.814	321.168	Invalid mass	No results	No results	1.79849	0.846784	6.98942e-06	1	1.43127	up
Com_119_pos	L-Dopa	C9 H11 N O4	197.069	1.936	198.076	Full match	Full match	Full match	0.390676	-1.35596	7.34571e-06	1	1.46149	down
Com_3847_pos	Robinin	C33 H40 O19	740.23	9.823	741.237	Invalid mass	No results	No results	0.476186	-1.0704	7.9676e-06	1	1.43699	down
Com_13917_pos	7-Ethylcamptothecin	C22 H20 N2 O4	376.14	9.1	377.147	No results	No results	Full match	0.498428	-1.00454	8.52016e-06	1	1.45638	down
Com_2045_pos	4-Ethylbenzaldehyde	C9 H10 O	134.073	9.782	135.081	Full match	No results	No results	0.40793	-1.29361	9.04211e-06	1	1.43914	down
Com_158_pos	Oleanic acid	C30 H48 O3	456.36	14.309	439.357	No results	No results	Full match	1.96193	0.972276	9.58002e-06	1	1.43527	up
Com_15357_pos	Linderalactone	C15 H16 O3	244.11	12.709	245.118	No results	Full match	Full match	2.32046	1.21441	1.00366e-05	1	1.43712	up
Com_10389_pos	4,6,8-trihydroxy-7-methoxy-3-methyl-3,4-dihydro-1H-2-benzopyran-1-one	C11 H12 O6	240.064	8.279	241.071	Full match	No results	No results	0.545624	-0.874022	1.01632e-05	1	1.43429	down
Com_5455_pos	4-methoxy-9-(2-methylbut-3-en-2-yl)-7H-furo[3,2-g]chromen-7-one	C17 H16 O4	284.103	12.71	285.11	Invalid mass	No results	No results	2.33211	1.22164	1.04795e-05	1	1.44195	up
Com_5330_pos	YQH	C20 H26 N6 O6	892.386	11.389	893.392	Invalid mass	No results	No results	7.20882	2.84976	1.06536e-05	1	1.48225	up
Com_6048_pos	18-尾-Glycyrrhetinic acid	C30 H46 O4	470.34	13.53	471.348	Full match	Full match	Full match	0.432517	-1.20917	1.18788e-05	1	1.42261	down
Com_2011_pos	Alternariol	C14 H10 O5	258.054	9.896	259.062	Invalid mass	No results	No results	2.15832	1.10991	1.21935e-05	1	1.42969	up
Com_21873_pos	Aloesin	C19 H22 O9	810.235	10.314	811.243	Invalid mass	No results	No results	3.72886	1.89874	1.40129e-05	1	1.48254	up
Com_11662_pos	O-Phospho-L-serine	C3 H8 N O6 P	185.009	1.322	186.016	No results	No results	Full match	2.95947	1.56534	1.41247e-05	1	1.42276	up
Com_12058_pos	alpha-Asarone	C12 H16 O3	208.11	15.007	209.117	No results	No results	Full match	2.20702	1.1421	1.45676e-05	1	1.42499	up
Com_8186_pos	5-(4-methylphenyl)-2-phenyl-6H-1,3-thiazin-6-one	C17 H13 N O S	279.075	2.599	280.082	Invalid mass	No results	No results	0.420266	-1.25062	1.49337e-05	1	1.45708	down
Com_11635_pos	FQH	C20 H26 N6 O5	468.162	11.524	469.169	Invalid mass	No results	No match	0.414889	-1.2692	1.49503e-05	1	1.41705	down
Com_20981_pos	N-Feruloylspermidine	C17 H27 N3 O3	321.206	6.389	322.213	No results	No results	Full match	1.56036	0.641883	1.78455e-05	1	1.41114	up
Com_959_pos	3,4-Dihydroxybenzaldehyde	C7 H6 O3	138.032	1.93	139.039	Full match	Full match	Full match	0.373887	-1.41932	1.84514e-05	1	1.4254	down
Com_1616_pos	Syringic acid	C9 H10 O5	198.053	6.979	199.06	Full match	Full match	Full match	0.583079	-0.778236	1.93009e-05	1	1.41189	down
Com_18947_pos	Rosmarinic acid	C18 H16 O8	377.109	6.555	378.117	Invalid mass	No results	No results	2.21883	1.1498	1.93209e-05	1	1.4088	up
Com_1735_pos	Adenosine 3'5'-cyclic monophosphate	C10 H12 N5 O6 P	329.053	2.247	330.06	Full match	Full match	Full match	1.97377	0.980957	1.96922e-05	1	1.44057	up
Com_137_pos	5-[(10Z)-14-(3,5-dihydroxyphenyl)tetradec-10-en-1-yl]benzene-1,3-diol	C26 H36 O4	412.259	15.69	413.266	Invalid mass	No results	No results	22.8772	4.51584	2.04794e-05	1	1.4761	up
Com_4349_pos	15-Deoxy-螖12,14-prostaglandin A1	C20 H30 O3	300.209	13.445	301.217	Invalid mass	No results	No match	1.54748	0.629922	2.05713e-05	1	1.41025	up
Com_13937_pos	ethyl 2,3-dioxo-1,2,3,4-tetrahydroquinoline-4-carboxylate	C12 H11 N O4	233.069	7.096	234.076	Full match	No results	No results	1.88445	0.914143	2.20842e-05	1	1.40737	up
Com_1183_pos	Benzamide	C7 H7 N O	121.053	1.921	122.06	Full match	No results	Full match	2.37281	1.24659	2.21256e-05	1	1.40542	up
Com_4409_pos	Isomucronulatol-7-O-glucoside	C23 H28 O10	464.167	11.023	465.174	No results	No results	Full match	2.04448	1.03173	2.32926e-05	1	1.40938	up
Com_1882_pos	Pantothenic acid	C9 H17 N O5	219.111	6.776	220.118	Full match	Full match	Full match	1.76059	0.816056	2.68597e-05	1	1.4049	up
Com_497_pos	1,N6-Etheno-2-Deoxy-Adenosine	C12 H13 N5 O3	275.101	7.081	276.108	No results	No results	Full match	0.567901	-0.816289	2.96423e-05	1	1.40264	down
Com_1305_pos	iP9G	C16 H23 N5 O5	365.169	10.355	366.177	No results	No results	Full match	0.615695	-0.699712	2.98142e-05	1	1.40295	down
Com_6169_pos	Isohomovanillic acid	C9 H10 O4	182.058	6.436	183.066	Full match	No results	Full match	1.7833	0.834546	3.05773e-05	1	1.40873	up
Com_5728_pos	4-fluoro-N-[4-(4-methylpiperazino)phenyl]benzenesulfonamide	C17 H20 F N3 O2 S	349.128	10.27	350.135	Invalid mass	No results	No results	1.85802	0.893768	3.27991e-05	1	1.39588	up
Com_2254_pos	Benzoic Acid	C7 H6 O2	122.037	6.625	123.044	No results	No results	Full match	1.75742	0.813455	3.40189e-05	1	1.40572	up
Com_4966_pos	1-Methyladenine	C6 H7 N5	149.07	7.752	337.104	No results	No results	Full match	0.43218	-1.21029	3.6449e-05	1	1.42951	down
Com_5242_pos	3-Hydroxyhippuric Acid	C9 H9 N O4	195.053	1.935	196.061	No results	No results	Full match	0.415942	-1.26555	3.73821e-05	1	1.42009	down
Com_9080_pos	2,3-di(acetyloxy)-3-cyano-1-[1,2-di(acetyloxy)ethyl]propyl acetate	C16 H21 N O10	387.117	6.436	388.124	Full match	No results	No results	0.440047	-1.18427	3.74278e-05	1	1.43214	down
Com_9701_pos	N-morpholino-N'-[(5-nitro-3-thienyl)carbonyl]urea	C10 H12 N4 O5 S	338.01	6.626	339.016	Invalid mass	No results	No results	1.59314	0.671872	3.82578e-05	1	1.39279	up
Com_3458_pos	O1-(2,6-dichlorobenzyl)-4-methoxybenzene-1-carbohydroximamide	C15 H14 Cl2 N2 O2	324.046	6.414	325.054	Invalid mass	No results	No results	1.92888	0.947765	3.87655e-05	1	1.40282	up
Com_13164_pos	Norfludiazepam	C15 H10 Cl F N2 O	288.046	12.037	289.053	Full match	No results	No results	0.420694	-1.24916	4.07343e-05	1	1.39081	down
Com_22205_pos	N-(3-Indolylacetyl)-L-Alanine	C13 H14 N2 O3	246.101	7.873	247.108	No results	No results	Full match	2.16438	1.11395	4.38282e-05	1	1.43694	up
Com_4154_pos	Dehydrodiisoeugenol	C20 H22 O4	326.152	9.395	327.16	No results	No results	Full match	0.378063	-1.4033	4.85078e-05	1	1.3995	down
Com_16638_pos	(2,6-dimethylmorpholino)(1-methyl-5-nitro-1H-pyrazol-4-yl)methanone	C11 H16 N4 O4	306.072	7.905	307.079	Invalid mass	No results	No results	3.03701	1.60265	4.91046e-05	1	1.42273	up
Com_4691_pos	N4-(4-chloro-2,5-dimethoxyphenyl)morpholine-4-carbothioamide	C13 H17 Cl N2 O3 S	338.042	7.711	339.049	Invalid mass	No results	No results	1.88661	0.915798	5.18787e-05	1	1.39753	up
Com_8765_pos	Cytidine-5'-monophosphate	C9 H14 N3 O8 P	323.052	1.492	324.059	No results	No results	Full match	1.68388	0.751791	5.66005e-05	1	1.37977	up
Com_3553_pos	Pinoresinol Diglucoside	C32 H42 O16	682.246	7.553	683.253	No results	No results	Full match	1.85284	0.88974	5.80573e-05	1	1.38931	up
Com_17675_pos	Zeatin-7-N-glucoside	C16 H23 N5 O6	381.164	6.473	382.171	Full match	No results	Full match	0.326264	-1.61589	5.97968e-05	1	1.44599	down
Com_8497_pos	4-(3,4-dihydro-2H-1,5-benzodioxepin-7-ylamino)-4-oxobutanoic acid	C13 H15 N O5	247.085	6.809	248.092	Invalid mass	No results	No results	0.460004	-1.12028	6.20755e-05	1	1.42177	down
Com_5574_pos	Bufalin	C24 H34 O4	386.246	13.449	387.253	No results	Full match	Full match	1.6334	0.707879	6.52368e-05	1	1.38814	up
Com_12020_pos	Galangin	C15 H10 O5	270.053	10.211	271.061	Full match	Full match	Full match	2.34019	1.22662	6.55946e-05	1	1.4035	up
Com_8881_pos	8-Chlro-1-tetrahydronorharmanone	C11 H9 Cl N2 O	220.041	5.911	221.048	No results	No results	Full match	0.480408	-1.05767	6.86096e-05	1	1.37949	down
Com_19115_pos	Dehydroevodiamine	C19 H15 N3 O	301.123	7.493	302.13	No results	No results	Full match	0.404201	-1.30686	7.37705e-05	1	1.43022	down
Com_1249_pos	Pomolic acid beta-D-glucopyranosyl ester	C36 H58 O9	634.406	15.058	635.413	No results	No results	Full match	0.656348	-0.607468	7.89014e-05	1	1.41093	down
Com_7623_pos	3-hydroxy-3,4-bis[(4-hydroxy-3-methoxyphenyl)methyl]oxolan-2-one	C20 H22 O7	412.099	8.282	413.106	Invalid mass	No results	No results	0.248009	-2.01153	8.13877e-05	1	1.40931	down
Com_7413_pos	(2R,3S,4S,5R,6R)-2-(hydroxymethyl)-6-(2-phenylethoxy)oxane-3,4,5-triol	C14 H20 O6	284.124	7.838	285.131	Invalid mass	No results	No results	1.69377	0.76024	8.60561e-05	1	1.38221	up
Com_12919_pos	Erianin	C18 H22 O5	318.147	10.249	319.154	No results	No results	Full match	2.1813	1.12518	9.36225e-05	1	1.36346	up
Com_4159_pos	5-(2,5-dihydroxyhexyl)oxolan-2-one	C10 H18 O4	224.105	7.139	225.112	Invalid mass	No results	No match	1.63524	0.709505	9.41649e-05	1	1.37012	up
Com_2676_pos	Valerophenone	C11 H14 O	162.105	10.469	163.112	Full match	No results	No results	1.63713	0.711166	9.90955e-05	1	1.3629	up
Com_12349_pos	1-[(3S)-3-(1,3-Benzothiazol-2-yl)-1-pyrrolidinyl]-2-phenoxyethanone	C19 H18 N2 O2 S	320.096	4.098	321.103	Invalid mass	No results	No results	0.478624	-1.06304	0.000103355	1	1.40171	down
Com_4464_pos	4-[5-(4-chlorophenyl)-1,3,4-oxadiazol-2-yl]morpholine	C12 H12 Cl N3 O2	265.059	2.156	266.066	Invalid mass	No results	No results	0.542135	-0.883275	0.000105904	1	1.37509	down
Com_4231_pos	Vitexin	C21 H20 O10	432.106	9.13	433.114	Full match	Full match	Full match	6.56177	2.71409	0.000106955	1	1.37055	up
Com_9666_pos	N-[4-(benzyloxy)phenyl]-N'-[2-chloro-6-(4-methoxyphenoxy)benzyl]urea	C28 H25 Cl N2 O4	510.136	9.274	511.142	Invalid mass	No results	No results	0.582188	-0.780442	0.000107711	1	1.36816	down
Com_879_pos	Hypoxanthine-9-beta-D-Arabinofuranoside	C10 H12 N4 O5	268.08	1.447	291.069	No results	No results	Full match	1.60692	0.684301	0.000112455	1	1.36924	up
Com_11354_pos	Dihydrokaempferol	C15 H12 O6	288.065	8.736	289.072	No results	No results	Full match	2.01746	1.01254	0.00011262	1	1.35971	up
Com_1637_pos	Biotin	C10 H16 N2 O3 S	244.085	9.225	245.093	Invalid mass	No results	No results	1.67409	0.743378	0.000112796	1	1.36114	up
Com_19155_pos	N-Acetylneuraminic acid	C11 H19 N O9	331.091	5.567	332.098	Invalid mass	No results	No results	0.537322	-0.896142	0.000114035	1	1.36217	down
Com_2921_pos	ethyl 3-hydroxy-4,6-dimethoxy-2-oxoindoline-3-carboxylate	C13 H15 N O6	281.09	5.263	282.098	Full match	No results	No results	2.08589	1.06066	0.000121598	1	1.42886	up
Com_3433_pos	N1-(4-methylidene-3-thia-1-azaspiro[4.5]dec-2-yliden)-2-chloroaniline	C15 H17 Cl N2 S	292.077	1.323	293.084	Invalid mass	No results	No results	0.618301	-0.693618	0.000127032	1	1.36762	down
Com_16303_pos	Irisflorentin	C20 H18 O8	386.1	10.1	387.107	No results	No results	Full match	2.67314	1.41854	0.000130371	1	1.39995	up
Com_352_pos	1,2-Benzenedicarboxylic acid	C8 H6 O4	166.027	15.68	167.034	No results	No results	Full match	8.68547	3.1186	0.000137133	1	1.42527	up
Com_10249_pos	Cefditoren pivoxil	C25 H28 N6 O7 S3	620.118	9.623	621.125	Full match	No results	No results	0.491588	-1.02448	0.000137712	1	1.35517	down
Com_5565_pos	Aflatoxin M1	C17 H12 O7	350.044	10.161	351.052	Invalid mass	No results	No results	0.601376	-0.73366	0.000142614	1	1.36454	down
Com_8017_pos	Linarin	C28 H32 O14	592.18	7.912	593.187	No results	No results	Full match	1.75501	0.811482	0.000152736	1	1.35131	up
Com_3955_pos	Lithospermoside	C14 H19 N O8	329.111	7.014	330.119	No results	No results	Full match	1.78765	0.838068	0.000160495	1	1.35434	up
Com_11343_pos	1-phenyl-3-{[5-(trifluoromethyl)-2-pyridyl]thio}prop-2-en-1-one	C15 H10 F3 N O S	346.997	2.557	348.004	Invalid mass	No results	No results	1.88833	0.917111	0.000161707	1	1.34675	up
Com_10315_pos	N-[5-methyl-2-(1H-pyrrol-1-yl)phenyl]-3-(trifluoromethyl)benzamide	C19 H15 F3 N2 O	344.109	8.985	345.116	Invalid mass	No results	No results	0.465935	-1.1018	0.000191683	1	1.41604	down
Com_6070_pos	Panaxydol	C17 H24 O2	260.178	14.308	261.185	No results	No results	Full match	1.78233	0.833765	0.000195709	1	1.36688	up
Com_8913_pos	Lithocholic Acid	C24 H40 O3	414.254	14.524	415.261	Invalid mass	No results	No results	0.395019	-1.34001	0.000198203	1	1.34374	down
Com_13115_pos	Limonin	C26 H30 O8	492.175	5.935	493.183	Invalid mass	No results	No results	1.60913	0.686281	0.000200963	1	1.33714	up
Com_13479_pos	6-Acetylmorphine	C19 H21 N O4	327.147	10.679	328.155	Full match	No results	Full match	0.467131	-1.0981	0.000207593	1	1.35876	down
Com_236_pos	4'-Methoxyacetophenone	C9 H10 O2	150.068	8.158	151.076	Full match	No results	Full match	2.10741	1.07547	0.000216709	1	1.36453	up
Com_7327_pos	Paederoside	C18 H22 O11 S	446.087	8.449	447.094	No results	No results	Full match	1.59888	0.677059	0.000221548	1	1.33933	up
Com_2741_pos	6-benzyl-4-oxo-1,4-dihydropyridine-3-carboxamide	C13 H12 N2 O2	250.069	1.456	251.076	Invalid mass	No results	No results	2.71284	1.4398	0.000234682	1	1.39678	up
Com_12972_pos	(2R,3S,4S,5R,6R)-2-(hydroxymethyl)-6-(propan-2-yloxy)oxane-3,4,5-triol	C9 H18 O6	222.113	7.963	223.12	Invalid mass	No results	No results	1.55052	0.632753	0.000237237	1	1.34328	up
Com_1721_pos	4-Ethylphenol	C8 H10 O	122.073	8.654	123.081	No results	No results	Full match	0.512284	-0.964985	0.000250865	1	1.37789	down
Com_3597_pos	Histamine	C5 H9 N3	111.08	1.138	112.087	No results	No results	Full match	1.84653	0.884815	0.000256316	1	1.36036	up
Com_9459_pos	Eurycomanone	C20 H24 O9	408.14	8.297	409.147	No results	Invalid mass	No results	0.549308	-0.864313	0.000276273	1	1.33924	down
Com_15753_pos	Glu-Glu	C10 H14 N2 O7	274.08	1.462	275.088	No results	No results	Full match	0.614382	-0.702791	0.000276959	1	1.33352	down
Com_5619_pos	(2R)-5-hydroxy-7-methoxy-2-phenyl-3,4-dihydro-2H-1-benzopyran-4-one	C16 H14 O4	270.09	7.407	271.097	Full match	No results	Full match	1.63148	0.706182	0.000277168	1	1.32316	up
Com_8650_pos	1,7-bis(3,4-dihydroxyphenyl)heptan-3-one	C19 H22 O5	352.128	2.292	353.135	Invalid mass	No results	No results	0.530192	-0.915413	0.000277697	1	1.36055	down
Com_9308_pos	Chrysin 7-O-beta-gentiobioside	C27 H30 O14	578.164	10.893	579.171	No results	No results	Full match	0.328142	-1.60761	0.000287889	1	1.41389	down
Com_11157_pos	1,3-dimethyl-6-(trifluoromethyl)-1H-pyrazolo[3,4-b]pyridin-4-ol	C9 H8 F3 N3 O	253.041	6.656	254.048	Invalid mass	No results	No results	2.06847	1.04856	0.000290773	1	1.3765	up
Com_12261_pos	Pinocembrin	C15 H12 O4	256.074	11.201	257.081	Full match	Full match	Full match	1.72289	0.784834	0.000297534	0.972222	1.32927	up
Com_10034_pos	Wilforlide A	C30 H46 O3	454.345	10.417	455.352	No results	No results	Full match	2.1367	1.09538	0.000303911	1	1.36556	up
Com_5452_pos	Khasianine	C39 H63 N O11	721.441	13.448	722.448	No results	No results	Full match	1.69545	0.761669	0.000304616	1	1.34441	up
Com_5550_pos	3-O-p-coumaroyl quinic acid O-hexoside	C22 H28 O13	500.151	9.436	501.16	No results	No results	Full match	1.75108	0.808249	0.000319506	1	1.34975	up
Com_3827_pos	Kinetin 9-riboside	C15 H17 N5 O5	347.122	3.339	348.129	No results	No results	Full match	1.85738	0.893268	0.00032487	1	1.34885	up
Com_10382_pos	Quercetin-3,4'-O-di-beta-glucopyranoside	C27 H30 O17	626.147	8.153	627.154	No results	No results	Full match	0.505494	-0.984235	0.00032734	1	1.36154	down
Com_4418_pos	4-oxo-5-phenylpentanoic acid	C11 H12 O3	174.068	8.422	175.076	Invalid mass	No results	No match	1.67485	0.744032	0.000330795	0.972222	1.31733	up
Com_1496_pos	4-Phenylbutyric acid	C10 H12 O2	164.084	7.628	165.091	Full match	No results	Full match	0.661316	-0.596588	0.000331397	1	1.31969	down
Com_1944_pos	Monoolein	C21 H40 O4	356.293	14.936	357.301	Full match	No results	Full match	1.62968	0.704592	0.000334413	1	1.3628	up
Com_12075_pos	Alkannin	C16 H16 O5	288.104	8.163	289.111	No results	Invalid mass	No results	1.84106	0.880534	0.00034335	1	1.39315	up
Com_3161_pos	1,7-bis(4-hydroxyphenyl)heptan-3-one	C19 H22 O3	280.143	6.144	281.15	Invalid mass	No results	No results	0.524045	-0.932237	0.000368201	0.972222	1.31345	down
Com_14284_pos	4-methoxyphenyl 3,5-dimethyl-1-phenyl-1H-pyrazole-4-carboxylate	C19 H18 N2 O3	344.11	6.016	345.117	Invalid mass	No results	No results	1.95342	0.966005	0.000368834	1	1.34143	up
Com_12080_pos	Gossypol	C30 H30 O8	518.195	9.446	536.229	No results	No results	Full match	3.43798	1.78156	0.000380049	1	1.37884	up
Com_10526_pos	Nodakenin	C20 H24 O9	408.141	11.212	409.148	No results	No results	Full match	0.580206	-0.785364	0.000399306	1	1.31009	down
Com_3353_pos	2-(cyclopropylcarbonyl)-3-(4-fluoroanilino)acrylonitrile	C13 H11 F N2 O	268.042	1.434	269.049	Invalid mass	No results	No results	0.604226	-0.72684	0.000417965	1	1.30718	down
Com_19088_pos	CYM-5442	C23 H27 N3 O4	818.408	11.444	819.416	Invalid mass	No results	No results	2.34077	1.22698	0.000431707	1	1.36157	up
Com_6154_pos	Testosterone	C19 H28 O2	288.209	13.451	289.216	Full match	No results	No results	2.22568	1.15425	0.000435519	1	1.38843	up
Com_3610_pos	Triethyl citrate	C12 H20 O7	276.121	9.135	277.129	No results	No results	Full match	1.57022	0.650966	0.000503423	1	1.2971	up
Com_13602_pos	beta-Acetoxyisovalerylalkannin	C23 H26 O8	430.164	10.242	431.172	No results	No results	Full match	0.605494	-0.723816	0.000513279	1	1.30551	down
Com_299_pos	Sugiol	C20 H28 O2	300.208	15.172	601.424	No results	No results	Full match	0.386731	-1.3706	0.000522969	1	1.29868	down
Com_13396_pos	Methyl palmitate	C17 H34 O2	270.256	14.817	271.264	Full match	No results	Full match	1.58711	0.666405	0.000528471	0.972222	1.31183	up
Com_10412_pos	N-Sinapoylputrescine	C15 H22 N2 O4	294.158	7.509	295.166	No results	No results	Full match	0.456197	-1.13227	0.000551397	1	1.37281	down
Com_529_pos	Ajugol	C15 H24 O9	348.143	10.355	349.15	No results	No results	Full match	0.649371	-0.622886	0.000551856	1	1.30038	down
Com_5720_pos	Astilbin	C21 H22 O11	450.115	9.543	451.123	Full match	No results	Full match	1.94317	0.958415	0.00055705	1	1.37785	up
Com_3312_pos	13-HPODE	C18 H32 O4	312.23	12.312	313.237	No results	No results	Full match	2.21841	1.14953	0.000567934	1	1.32435	up
Com_8606_pos	Albendazole-2-aminosulfone	C10 H13 N3 O2 S	217.095	8.799	218.103	Invalid mass	No results	No results	0.631706	-0.662675	0.000581568	1	1.31025	down
Com_2774_pos	4-OHE2-1-N3Ade	C23 H27 N5 O3	421.21	10.857	422.218	Full match	No results	No results	0.511568	-0.967002	0.000622684	1	1.30876	down
Com_21621_pos	N1-{[5-(2,4-difluorophenyl)-2-furyl]methyl}benzene-1-sulfonamide	C17 H13 F2 N O3 S	371.04	6.696	372.047	Invalid mass	No results	No results	0.484879	-1.0443	0.000624657	0.972222	1.29418	down
Com_3974_pos	trans-3-Indoleacrylic acid	C11 H9 N O2	187.064	9.223	188.071	No results	No results	Full match	1.55568	0.637548	0.000676446	1	1.27977	up
Com_11170_pos	ethyl 3-[2-(tert-butyl)-4-(1,3-thiazol-2-yl)phenyl]-2-cyanoacrylate	C19 H20 N2 O2 S	388.128	10.971	389.135	Invalid mass	No results	No results	1.82053	0.864361	0.000683534	1	1.31293	up
Com_8101_pos	N-[2,5-bis(2,2,2-trifluoroethoxy)benzoyl]-N'-(4-methoxyphenyl)urea	C19 H16 F6 N2 O5	466.088	8.412	467.096	Invalid mass	No results	No results	0.472543	-1.08148	0.000685089	1	1.34672	down
Com_9304_pos	13,14-dihydro-15-keto-tetranor Prostaglandin E2	C16 H26 O5	320.16	11.969	321.168	Invalid mass	No results	No results	1.52365	0.607534	0.000696797	1	1.28011	up
Com_2541_pos	Antiarol	C9 H12 O4	184.074	5.977	185.081	No results	No results	Full match	1.57209	0.652686	0.00070385	1	1.30456	up
Com_4837_pos	Isosinensetin	C20 H20 O7	372.121	8.219	373.128	No results	No results	Full match	1.75688	0.813013	0.000710427	1	1.2775	up
Com_6942_pos	3-[(5-nitropyridin-2-yl)oxy]-1H-indazole	C12 H8 N4 O3	256.056	6.812	257.064	Invalid mass	No results	No results	0.592669	-0.754701	0.000765532	0.972222	1.28351	down
Com_3124_pos	1-[4-hydroxy-3-(3-methylbut-2-en-1-yl)phenyl]ethan-1-one	C13 H16 O2	204.115	11.043	205.123	Full match	No results	No results	1.51524	0.599543	0.000773639	1	1.27704	up
Com_18279_pos	7-(3,4-dihydroxyphenyl)-5-hydroxy-1-(4-hydroxyphenyl)heptan-3-one	C19 H22 O5	352.129	12.21	353.137	Invalid mass	No results	No results	0.427458	-1.22615	0.000799306	1	1.34662	down
Com_7525_pos	Methylophiopogonanone A	C19 H18 O6	342.111	9.6	343.118	No results	No results	Full match	1.62062	0.696543	0.000800676	1	1.27285	up
Com_17825_pos	Baohuoside II	C26 H28 O10	500.168	11.706	501.176	No results	No results	Full match	2.32622	1.21799	0.000804192	1	1.34106	up
Com_10183_pos	4,5-Dicaffeoylquinic acid	C25 H24 O12	498.115	11.733	499.122	Invalid mass	No results	No results	1.58515	0.664623	0.000879503	1	1.28568	up
Com_1587_pos	Dihydromethysticin	C15 H16 O5	276.1	8.706	277.107	Full match	No results	Full match	1.50388	0.588688	0.000972181	0.972222	1.26239	up
Com_5101_pos	(12Z)-9,10,11-trihydroxyoctadec-12-enoic acid	C18 H34 O5	347.267	12.31	348.275	Invalid mass	No results	No match	1.59466	0.67325	0.000982166	1	1.31666	up
Com_16119_pos	Nortanshinone	C17 H12 O4	280.074	8.51	281.081	No results	No results	Full match	1.61692	0.693252	0.00104614	0.972222	1.27371	up
Com_3032_pos	Canthaxanthin	C40 H52 O2	564.398	14.69	565.405	No results	No results	Full match	0.391097	-1.3544	0.00105178	1	1.31854	down
Com_12592_pos	3-hydroxy-1,5-diphenylpentan-1-one	C17 H18 O2	276.111	7.765	277.119	Invalid mass	No results	No results	1.73578	0.795582	0.00114788	0.972222	1.28463	up
Com_12633_pos	Phlorizin	C21 H24 O10	458.12	7.142	459.127	Invalid mass	No results	No match	1.9901	0.992841	0.0011811	0.944444	1.24988	up
Com_17673_pos	Aflatoxin G1	C17 H12 O7	328.06	6.943	329.067	Full match	No results	No results	1.68891	0.75609	0.00120101	0.944444	1.25543	up
Com_21504_pos	Daphnoretin	C19 H12 O7	352.057	6.729	353.064	No results	No results	Full match	1.78821	0.83852	0.00121224	1	1.27152	up
Com_1578_pos	4-methoxy-6-(prop-2-en-1-yl)-2H-1,3-benzodioxole	C11 H12 O3	192.079	8.411	193.086	Full match	No results	Full match	1.54762	0.630048	0.00129695	0.972222	1.25251	up
Com_17610_pos	DHZROG	C21 H33 N5 O10	515.224	6.626	516.231	No results	No results	Full match	1.63884	0.712673	0.0013263	1	1.24879	up
Com_6785_pos	2,4-diaziran-1-yl-6-(1-phenyl-1H-pyrrol-2-yl)-1,3,5-triazine	C17 H16 N6	304.143	6.77	305.15	Full match	No results	No match	1.56926	0.650082	0.00134277	1	1.24709	up
Com_20564_pos	C-hexosyl-luteolin O-p-coumaroylhexoside	C36 H36 O18	756.187	7.378	757.194	No results	No results	Full match	1.76587	0.820378	0.00138337	1	1.23913	up
Com_887_pos	4-(2,3-dihydro-1,4-benzodioxin-6-yl)-1,2-diphenylbut-2-ene-1,4-dione	C24 H18 O4	370.125	10.356	371.132	Invalid mass	No results	No match	0.655912	-0.608427	0.00145701	0.972222	1.25101	down
Com_15061_pos	Tanshindiol C	C18 H16 O5	312.1	9	313.108	No results	No results	Full match	0.529811	-0.916449	0.00146715	0.972222	1.24919	down
Com_16533_pos	N-[4-(aminosulfonyl)phenyl]-2-chloro-6-fluorobenzamide	C13 H10 Cl F N2 O3 S	328.008	1.926	329.015	Full match	No results	No results	2.08008	1.05664	0.00153743	1	1.26934	up
Com_22635_pos	N'2-(2-furylcarbonyl)-3-chloro-4-methylthiophene-2-carbohydrazide	C11 H9 Cl N2 O3 S	265.991	6.625	266.998	Invalid mass	No results	No results	1.687	0.754457	0.00165687	1	1.26176	up
Com_8128_pos	4-(tert-Butyl)phenyl N-[4-(1,2,3-thiadiazol-4-yl)benzoyl]carbamate	C20 H19 N3 O3 S	381.112	7.773	382.119	Invalid mass	No results	No results	0.653603	-0.613514	0.00175703	1	1.25977	down
Com_15607_pos	Phe-Phe	C18 H20 N2 O3	312.147	9.254	313.155	No results	No results	Full match	0.648275	-0.625322	0.00178349	0.972222	1.227	down
Com_7740_pos	Maslinic acid	C30 H48 O4	472.356	14.247	473.364	Full match	No results	Full match	0.656468	-0.607203	0.00180294	1	1.33215	down
Com_12170_pos	Linustatin	C16 H27 N O11	426.187	7.312	427.194	Invalid mass	No results	No match	1.62211	0.697874	0.00185236	1	1.30913	up
Com_2102_pos	Cinnamaldehyde	C9 H8 O	132.058	13.447	115.054	No results	No results	Full match	1.5776	0.657733	0.00201251	0.944444	1.21709	up
Com_8981_pos	Lycoperodine	C12 H12 N2 O2	216.09	7.998	217.098	No results	No results	Full match	1.53562	0.618818	0.00202863	0.944444	1.22988	up
Com_7766_pos	Protodioscin	C51 H84 O22	1048.55	13.444	1049.56	No results	No results	Full match	0.519515	-0.944763	0.00211282	1	1.22543	down
Com_14693_pos	Demethoxycurcumin	C20 H18 O5	338.115	8.248	339.123	No results	Full match	Full match	1.82778	0.87009	0.00225395	1	1.22806	up
Com_16264_pos	Rhapontigenin 3'-O-glucoside	C21 H24 O9	420.14	11.067	421.147	No results	No results	Full match	0.666613	-0.585078	0.00229629	0.944444	1.23059	down
Com_6718_pos	Corilagin	C27 H22 O18	634.078	9.031	635.085	No results	No results	Full match	0.602262	-0.731537	0.00230768	1	1.22227	down
Com_9331_pos	8,8-dimethyl-2-phenyl-4H,8H-pyrano[2,3-h]chromen-4-one	C20 H16 O3	304.114	3.849	305.121	Invalid mass	No results	No results	0.603879	-0.727669	0.00248795	1	1.22133	down
Com_22912_pos	Dinophysistoxin-1	C45 H70 O13	840.466	14.284	841.473	Invalid mass	No results	No results	0.499739	-1.00075	0.00250297	1	1.20315	down
Com_17201_pos	N'-[6-(tert-butyl)thieno[3,2-d]pyrimidin-4-yl]-4-methylbenzohydrazide	C18 H20 N4 O S	362.118	13.138	363.126	Invalid mass	No results	No results	0.643556	-0.635862	0.00260522	1	1.22127	down
Com_12698_pos	IAA-Glu	C15 H16 N2 O5	304.106	8.932	305.114	No results	No results	Full match	1.98408	0.988473	0.00289243	1	1.23892	up
Com_8459_pos	Tenuifoliside A	C31 H38 O17	682.211	8.996	683.217	No results	No results	Full match	0.602431	-0.731131	0.00296214	1	1.22233	down
Com_2713_pos	Olivetol	C11 H16 O2	180.115	15.133	181.122	No results	No results	Full match	0.485242	-1.04322	0.00301205	0.916667	1.19178	down
Com_12597_pos	Vitamin B12	C63 H88 Co N14 O14 P	1354.57	1.251	678.292	No results	No results	Full match	1.95678	0.968482	0.0033094	0.972222	1.22805	up
Com_21353_pos	N8-Acetylspermidine	C9 H23 Cl2 N3 O	259.121	7.706	260.128	No results	No results	Full match	0.58124	-0.782794	0.00359199	0.944444	1.17656	down
Com_22371_pos	Tricin 4'-O-(syringyl alcohol) ether	C26 H24 O10	496.136	10.246	497.143	No results	No results	Full match	2.56397	1.35838	0.00377776	1	1.2388	up
Com_11199_pos	Salvianolic acid D	C20 H18 O10	418.092	7.938	419.099	No results	No results	Full match	1.638	0.711935	0.00389514	0.944444	1.17374	up
Com_15509_pos	C-pentosyl-luteolin-C-hexoside	C26 H28 O15	580.143	10.011	581.15	No results	No results	Full match	1.94381	0.958888	0.00430525	0.972222	1.18966	up
Com_16998_pos	Neohesperidin	C28 H34 O15	610.189	9.974	611.195	No results	No results	Full match	0.508228	-0.976451	0.00430905	0.944444	1.17415	down
Com_1446_pos	Isorhapontigenin	C15 H14 O4	258.09	8.412	259.097	Full match	Full match	Full match	2.15006	1.10437	0.00436433	0.888889	1.23159	up
Com_9546_pos	2,4-dihydroxyheptadec-16-en-1-yl acetate	C19 H36 O4	350.244	15.025	351.252	Invalid mass	No results	No match	1.85665	0.892702	0.00449002	0.916667	1.15404	up
Com_14860_pos	(-)-Catechin Gallate	C22 H18 O10	442.091	10.138	443.097	No results	No results	Full match	0.65963	-0.60027	0.00499077	0.944444	1.1539	down
Com_11351_pos	ladanein	C17 H14 O6	314.079	10.163	315.087	No results	No results	Full match	0.650568	-0.620228	0.00563719	0.944444	1.16051	down
Com_15087_pos	Gatifloxacin	C19 H22 F N3 O4	397.135	8.122	398.142	Invalid mass	No results	No results	1.6125	0.6893	0.00630531	0.916667	1.12727	up
Com_15637_pos	Andrographolide	C20 H30 O5	350.207	12.458	351.214	Invalid mass	No results	No results	1.64885	0.721462	0.00693152	0.916667	1.12055	up
Com_593_pos	N-Acetyl-DL-glutamic acid	C7 H11 N O5	189.064	1.861	190.071	Full match	No results	Full match	1.55787	0.639573	0.00701008	1	1.17621	up
Com_14038_pos	Senecionine	C18 H25 N O5	335.177	10.588	336.184	Invalid mass	No results	No results	1.63281	0.707356	0.00754572	0.861111	1.12526	up
Com_5479_pos	TQH	C15 H24 N6 O6	384.176	12.035	385.184	Full match	No results	No results	0.504438	-0.987252	0.00797791	0.916667	1.12721	down
Com_6037_pos	Diosbulbin B	C19 H20 O6	344.124	9.791	689.256	No results	No results	Full match	0.539459	-0.890414	0.0081109	1	1.16659	down
Com_12337_pos	Syringetin	C17 H14 O8	346.07	9.191	347.078	No results	No results	Full match	0.315175	-1.66578	0.00821288	0.972222	1.15422	down
Com_19123_pos	Picrotoxinin	C15 H16 O6	292.095	6.629	293.103	No results	No results	Full match	1.67976	0.748258	0.00883126	0.944444	1.0946	up
Com_3620_pos	(5Z)-3-aminonon-5-enoic acid	C9 H17 N O2	171.126	13.971	172.133	Full match	No results	No results	1.85022	0.887699	0.00888775	0.888889	1.10386	up
Com_10672_pos	DL-threitol	C4 H10 O4	122.058	1.459	123.065	No results	No results	Full match	1.55283	0.634898	0.00907584	0.916667	1.09727	up
Com_5660_pos	Catechin	C15 H14 O6	312.063	10.827	313.07	Invalid mass	No results	No results	0.487374	-1.0369	0.0095107	1	1.17188	down
Com_21074_pos	7-Epitaxol	C47 H51 N O14	853.327	8.716	854.334	No results	No results	Full match	1.81324	0.85857	0.00968139	0.916667	1.09324	up
Com_9295_pos	2'-Deoxyadenosine	C10 H13 N5 O3	273.085	4.408	274.093	Invalid mass	No results	No results	0.596194	-0.746145	0.0104639	0.888889	1.0883	down
Com_6409_pos	2-{[2-(3-cyano-2-pyridinyl)hydrazino]carbonyl}benzoic acid	C14 H10 N4 O3	282.074	8.858	283.082	Full match	No results	No results	1.63728	0.711297	0.0106426	0.916667	1.07848	up
Com_9787_pos	Cistanoside F	C21 H28 O13	488.154	9.715	489.161	No results	No results	Full match	1.56669	0.647717	0.011121	0.916667	1.09112	up
Com_5286_pos	Artemisinin	C15 H22 O5	282.147	10.47	283.154	Full match	No results	Full match	1.5172	0.601408	0.011901	0.861111	1.121	up
Com_19955_pos	UR-144 N-(5-Bromopentyl) analog	C21 H28 Br N O	411.117	6.043	412.124	Invalid mass	No results	No results	1.66184	0.732783	0.0120299	0.861111	1.0768	up
Com_5406_pos	Rottlerin	C30 H28 O8	534.192	9.949	535.198	Invalid mass	No results	No results	0.555714	-0.847585	0.0140006	1	1.14848	down
Com_3491_pos	N-(9-oxodecyl)acetamide	C12 H23 N O2	213.173	13.758	214.18	Full match	No results	No results	1.76953	0.823363	0.0144901	0.861111	1.05408	up
Com_6113_pos	Aloenin	C19 H22 O10	410.121	8.833	411.128	No results	Full match	No results	1.57093	0.651618	0.0172867	0.888889	1.02734	up
Com_10279_pos	1-(4-ethoxyphenyl)-5-(prop-2-ynylthio)-1H-1,2,3,4-tetraazole	C12 H12 N4 O S	260.07	7.226	261.077	Invalid mass	No results	No results	1.90435	0.929302	0.0175774	0.888889	1.03645	up
Com_4739_pos	N-Acetylglucosamine	C8 H15 N O6	221.09	1.461	222.097	No results	No results	Full match	1.57234	0.652909	0.0213784	0.916667	1.04628	up
Com_14414_pos	WLH	C23 H30 N6 O4	908.474	14.372	909.48	Invalid mass	No results	No results	0.587163	-0.768166	0.0227833	0.861111	1.04726	down
Com_9799_pos	Schisandrin C	C22 H24 O6	384.158	9.054	385.166	No results	No results	Full match	1.93167	0.949851	0.0235942	0.861111	1.04445	up
Com_5009_pos	Przewaquinone A	C19 H18 O4	310.119	10.349	311.127	No results	No results	Full match	0.595329	-0.748242	0.0325539	0.972222	1.01107	down

## Sheet: LS vs. HS_neg
Differential metabolites in Haloxylon ammodendron under negative ion mode
ID	Name	Formula	Molecular Weight	RT [min]	m/z	mzCloud_Results	mzVault_Results	MassList_Results	FC	log2FC	Pvalue	ROC	VIP	Up/Down
Com_106_neg	Chikusetsu saponin IVa	C42 H66 O14	794.446	12.425	793.439	No results	Full match	Full match	15.9116	3.992	6.07004e-19	1	1.30982	up
Com_5840_neg	N1-(4-bromophenyl)-2-[4-(tert-butyl)phenoxy]propanamide	C19 H22 Br N O2	375.084	7.474	374.077	Full match	No results	No results	0.080021	-3.64348	1.73248e-15	1	1.3092	down
Com_957_neg	Palmaturbine	C20 H20 N O4	338.141	9.967	337.133	No results	No results	Full match	13.6803	3.77402	3.63102e-15	1	1.30893	up
Com_51_neg	Liriopemuscaribaily saponins C	C44 H70 O17	870.462	11.768	434.224	No results	No results	Full match	6.28045	2.65087	9.92267e-15	1	1.30919	up
Com_1360_neg	(3R)-4,4-Dimethyl-2-oxotetrahydro-3-furanyl beta-D-glucopyranoside	C12 H20 O8	338.122	6.009	337.115	Invalid mass	No results	No results	2.65488	1.40865	3.48066e-14	1	1.30865	up
Com_2756_neg	6-Thioinosine-phosphate	C10 H13 N4 O7 P S	364.029	7.069	363.022	Invalid mass	No results	No results	2.85519	1.51359	5.23807e-14	1	1.3083	up
Com_998_neg	methylChrysoeriol C-hexoside	C23 H24 O11	476.133	9.479	475.125	No results	No results	Full match	0.275765	-1.85849	5.35935e-14	1	1.30875	down
Com_987_neg	Polygalaxanthone 鈪?C23 H26 O12	494.143	9.479	493.138	No results	No results	Full match	3.44246e+07	-1.84368	7.88183e-14	1	1.30866	down
Com_1839_neg	Pratensein-7-O-glucoside	C22 H22 O11	462.118	5.712	461.111	No results	No results	Full match	2.40346	1.26512	1.17738e-13	1	1.30771	up
Com_3551_neg	Synephrine	C9 H13 N O2	167.095	2.14	166.088	No results	No results	Full match	37.3851	5.22439	1.2703e-12	1	1.30753	up
Com_574_neg	1,3,5-Trimethoxybenzene	C9 H12 O3	168.079	7.429	167.072	No results	No results	Full match	2.2539	1.17242	1.31361e-12	1	1.3063	up
Com_8662_neg	Protostemonine	C25 H31 N O6	441.213	11.828	440.206	No results	No results	Full match	0.0715876	-3.80415	1.56035e-12	1	1.30787	down
Com_2411_neg	Methyl-4-hydroxy-3-methoxybenzoate	C9 H10 O4	182.059	8.287	181.051	No results	Full match	Full match	2.90883	1.54044	2.30575e-12	1	1.30728	up
Com_2190_neg	Sattabacin	C13 H18 O2	206.131	8.685	205.124	No results	No results	Full match	0.478369	-1.0638	7.18346e-12	1	1.30509	down
Com_8199_neg	Lanatoside C	C49 H76 O20	984.494	11.053	491.24	No results	No results	Full match	14.1169	3.81935	8.65976e-12	1	1.30496	up
Com_194_neg	Momordin Ic	C41 H64 O13	764.436	13.376	763.429	No results	Full match	Full match	4.01324	2.00477	2.28799e-11	1	1.3057	up
Com_10750_neg	Dodecanedioic acid	C12 H22 O4	230.152	8.608	229.145	Full match	No results	Full match	7.4966	2.90624	3.7247e-11	1	1.30567	up
Com_11770_neg	N,5-Bis(3-nitrophenyl)oxazol-2-amine	C15 H10 N4 O5	326.067	5.684	325.06	Invalid mass	No results	No results	3.18039	1.6692	4.54353e-11	1	1.30549	up
Com_888_neg	4-Hydroxyphenylpyruvic acid	C9 H8 O4	180.043	9.566	179.035	Full match	Full match	Full match	3.61683	1.85472	4.71668e-11	1	1.30761	up
Com_5656_neg	Gallocatechin gallate	C22 H18 O11	458.087	9.261	457.079	No results	No results	Full match	0.261118	-1.93723	5.08861e-11	1	1.30842	down
Com_1020_neg	Purpurin	C14 H8 O5	256.038	8.884	255.03	No results	No results	Full match	0.588466	-0.764969	5.35065e-11	1	1.30278	down
Com_4063_neg	s7p	C7 H13 Ba O10 P	425.928	1.259	424.921	No results	No results	Full match	0.108544	-3.20364	6.52771e-11	1	1.30331	down
Com_1932_neg	2-(acetylamino)-3-[4-(acetylamino)phenyl]acrylic acid	C13 H14 N2 O4	262.096	2.277	261.089	Full match	No results	No results	2.6043	1.3809	7.89826e-11	1	1.30569	up
Com_19972_neg	(+)-Anwulignan	C20 H24 O4	328.168	11.132	327.16	No results	No results	Full match	5.64201	2.49621	1.03456e-10	1	1.30282	up
Com_5600_neg	Naringenin	C15 H12 O5	272.069	10.826	271.062	Full match	Full match	Full match	4.80744	2.26527	1.1687e-10	1	1.30796	up
Com_79_neg	Ophiopogonin D	C44 H70 O16	854.467	12.426	426.226	No results	No results	Full match	10.1165	3.33864	2.09702e-10	1	1.30897	up
Com_17571_neg	S-Sulfo-L-cysteine	C3 H7 N O5 S2	200.977	1.288	199.97	No results	No results	Full match	3.17646	1.66742	2.77896e-10	1	1.2995	up
Com_2055_neg	3-Indoxyl sulphate	C8 H7 N O4 S	213.01	6.325	212.003	Full match	Full match	No results	2.15508	1.10774	2.89631e-10	1	1.30085	up
Com_155_neg	N-Feruloyltyramine	C18 H19 N O4	313.132	10.124	312.124	No results	No results	Full match	0.649848	-0.621826	3.67655e-10	1	1.30057	down
Com_1728_neg	Galacturonic acid	C6 H10 O7	388.087	6.833	193.036	Invalid mass	No results	No results	0.495586	-1.01279	3.99267e-10	1	1.29982	down
Com_12226_neg	N-Coumaroyltyramine	C17 H17 N O3	283.121	10.028	282.114	No results	No results	Full match	0.359584	-1.4756	5.25031e-10	1	1.29806	down
Com_2309_neg	AICA ribonucleotide	C9 H15 N4 O8 P	338.068	7.064	337.06	Invalid mass	No results	No results	1.99634	0.997357	5.34556e-10	1	1.29911	up
Com_521_neg	Asperulosid	C18 H22 O11	414.117	5.714	413.11	No results	No results	Full match	2.26959	1.18243	5.89879e-10	1	1.30343	up
Com_1870_neg	Aldosterone	C21 H28 O5	360.187	12.175	359.179	Invalid mass	No results	No results	0.388533	-1.36389	6.14273e-10	1	1.30387	down
Com_54_neg	Miquelianin	C21 H18 O13	478.075	8.883	477.068	Full match	Full match	No results	0.605842	-0.722987	7.56668e-10	1	1.30126	down
Com_706_neg	D-(+)-Mannose	C6 H12 O6	180.064	6.66	179.056	Full match	Not the top hit	Full match	1.72314	0.785041	7.8517e-10	1	1.30501	up
Com_60_neg	Allantoin	C4 H6 N4 O3	158.044	1.417	157.037	No results	Full match	Full match	0.626324	-0.67502	1.29322e-09	1	1.29787	down
Com_918_neg	Kinsenoside	C10 H16 O8	264.085	8.056	263.078	No results	No results	Full match	1.88783	0.916731	1.30015e-09	1	1.29547	up
Com_5233_neg	Acetylcysteine	C5 H9 N O3 S	163.031	7.283	162.023	No results	No results	Full match	0.191432	-2.3851	1.31585e-09	1	1.30595	down
Com_1448_neg	Jasmonic acid	C12 H18 O3	210.126	9.806	209.119	Full match	Full match	Full match	0.518712	-0.946995	1.70073e-09	1	1.30386	down
Com_309_neg	Ferulic acid O-hexoside	C16 H20 O9	356.111	7.983	355.104	No results	No results	Full match	1.55155	0.633712	2.13471e-09	1	1.29544	up
Com_3137_neg	LPA 18:2	C21 H39 O7 P	434.244	14.362	433.237	No results	Full match	No results	0.209883	-2.25234	2.43876e-09	1	1.2992	down
Com_21_neg	Picfeltarraenin IB	C42 H64 O14	838.436	12.162	837.428	No results	Invalid mass	No results	0.550853	-0.86026	2.64363e-09	1	1.30177	down
Com_3144_neg	Aucubin	C15 H22 O9	346.127	4.387	345.12	No results	No results	Full match	2.87	1.52105	2.88215e-09	1	1.30385	up
Com_3098_neg	myricetin 3-O-beta-D-galactopyranoside	C21 H20 O13	480.095	7.801	479.087	Invalid mass	No results	No results	0.462495	-1.11249	2.91166e-09	1	1.30383	down
Com_12913_neg	Rifampicin	C43 H58 N4 O12	822.404	11.342	821.397	Full match	No results	No match	11.9271	3.57617	3.67293e-09	1	1.3021	up
Com_4574_neg	L-Stepholidine	C19 H21 N O4	327.147	11.344	326.14	No results	Full match	Full match	0.233114	-2.10089	3.81254e-09	1	1.30704	down
Com_9680_neg	(+/-)-Cannabichromeorcin	C17 H22 O2	258.164	11.129	257.157	Invalid mass	No results	No results	7.92552	2.98651	4.39014e-09	1	1.30561	up
Com_6504_neg	Catechol	C6 H6 O2	110.037	6.109	109.03	No results	No results	Full match	2.04366	1.03116	4.39537e-09	1	1.29411	up
Com_5798_neg	Eleutheroside E	C34 H46 O18	742.27	8.745	741.263	No results	Full match	Full match	1.83097	0.872612	8.00738e-09	1	1.28899	up
Com_3141_neg	Plantagoside	C21 H22 O12	466.109	7.895	465.102	No results	No results	Full match	1.54076	0.623639	9.2195e-09	1	1.29895	up
Com_4110_neg	Oxypaeoniflorin	C23 H28 O12	496.159	8.19	495.152	No results	Full match	No results	3.1456	1.65333	1.10589e-08	1	1.30401	up
Com_2324_neg	trans-Cinnamic acid	C9 H8 O2	148.053	7.478	147.046	Full match	No results	Full match	0.576522	-0.794552	1.25249e-08	1	1.29187	down
Com_4963_neg	Estriol 17-sulfate	C18 H24 O6 S	368.132	3.305	367.125	Invalid mass	No results	No results	1.54532	0.627908	1.25886e-08	1	1.28791	up
Com_9933_neg	2-Ethyl-3-hydroxy-4H-pyran-4-one	C7 H8 O3	140.047	8.018	139.04	No results	No results	Full match	3.04109	1.60459	1.28666e-08	1	1.28857	up
Com_2286_neg	2-(1H-1,2,3-benzotriazol-1-yl)-N-(2,3-dihydro-1H-inden-2-yl)acetamide	C17 H16 N4 O	292.135	9.764	291.128	Invalid mass	No results	No results	1.62303	0.698688	1.34432e-08	1	1.29303	up
Com_23976_neg	4-[4-(trifluoromethyl)phenyl]-1,2,3-thiadiazol-5-amine	C9 H6 F3 N3 S	490.046	3.464	244.016	Invalid mass	No results	No results	0.293852	-1.76684	1.42952e-08	1	1.29055	down
Com_9394_neg	Casticin	C19 H18 O8	374.101	8.175	373.093	No results	No results	Full match	0.480152	-1.05844	1.60084e-08	1	1.29678	down
Com_2654_neg	7-O-Methylmangiferin	C20 H20 O11	436.101	9.304	435.094	No results	No results	Full match	1.6824	0.750517	1.64351e-08	1	1.29911	up
Com_336_neg	PA (18:3/18:3)	C39 H65 O8 P	692.443	16.562	691.436	No results	Full match	No results	0.124399	-3.00695	1.7819e-08	1	1.29149	down
Com_4567_neg	Phenylacetaldehyde	C8 H8 O	120.058	9.067	119.051	Full match	No results	No results	2.03686	1.02634	1.99031e-08	1	1.29794	up
Com_11243_neg	5,7-Dihydroxy-2-(3-hydroxy-4-methoxyphenyl)chroman-4-one	C16 H14 O6	302.079	10.839	301.072	Full match	Full match	Full match	1.64544	0.718476	2.07559e-08	1	1.29384	up
Com_809_neg	Orcinol gentiobioside	C19 H28 O12	448.159	6.832	447.151	No results	Full match	Full match	2.38586	1.25451	2.16826e-08	1	1.29909	up
Com_1439_neg	Scutellarin	C21 H18 O12	231.04	9.252	230.033	No results	Invalid mass	No results	0.276359	-1.85539	2.79139e-08	1	1.30467	down
Com_16506_neg	Abscisic Acid	C15 H20 O4	264.137	9.122	263.129	No results	No results	Full match	0.533854	-0.905484	3.18944e-08	1	1.2869	down
Com_412_neg	N-benzyl-N-isopropyl-N'-[4-(trifluoromethoxy)phenyl]urea	C18 H19 F3 N2 O2	352.138	7.698	351.13	Invalid mass	No results	No results	3.16775	1.66346	3.43757e-08	1	1.30319	up
Com_271_neg	D-(+)-Arabitol	C5 H12 O5	152.069	1.4	151.061	Full match	Full match	Full match	0.630101	-0.666345	4.20912e-08	1	1.29753	down
Com_7749_neg	N-benzyl-3-(4-chlorophenyl)-4,5-dihydro-5-isoxazolecarboxamide	C17 H15 Cl N2 O2	314.087	1.951	313.079	Invalid mass	No results	No results	1.81264	0.858095	4.72395e-08	1	1.28341	up
Com_6497_neg	methyl 2-[(2-acetyl-3-oxo-1-butenyl)amino]acetate	C9 H13 N O4	199.085	3.379	198.078	Full match	No results	No results	1.80376	0.851006	4.98712e-08	1	1.30441	up
Com_4209_neg	Protocatechuic acid	C7 H6 O4	154.027	2.802	153.02	Full match	Full match	Full match	1.51199	0.596451	6.36774e-08	1	1.29195	up
Com_1738_neg	Erucic acid	C22 H42 O2	338.319	16.084	337.312	Full match	No results	Full match	0.441111	-1.18079	9.58252e-08	1	1.28435	down
Com_7496_neg	4,5-diphenyl-2,3-dihydro-1H-pyrazolo[3,4-c]pyridazin-3-one	C17 H12 N4 O	288.104	9.593	287.096	Invalid mass	No results	No results	0.650057	-0.621362	9.67582e-08	1	1.27763	down
Com_11131_neg	Asp-phe	C13 H16 N2 O5	280.106	7.52	279.099	No results	No results	Full match	2.43271	1.28256	9.9961e-08	1	1.27508	up
Com_269_neg	Camelliaside A	C33 H40 O20	756.212	9.319	755.205	No results	No results	Full match	2.96735	1.56918	1.05726e-07	1	1.27879	up
Com_20494_neg	Nomilin	C28 H34 O9	514.223	11.805	513.215	No results	No results	Full match	4.04999	2.01792	1.13604e-07	1	1.30229	up
Com_1128_neg	N-Acetyl-DL-tryptophan	C13 H14 N2 O3	246.101	4.118	245.094	Full match	Full match	Full match	1.55114	0.633327	1.20973e-07	1	1.29284	up
Com_12571_neg	13,14-dihydro-15-keto Prostaglandin D1	C20 H34 O5	780.43	10.907	389.208	Invalid mass	No results	No results	10.2031	3.35093	1.45348e-07	1	1.29541	up
Com_11975_neg	Lysopa 18:0	C21 H43 O7 P	438.275	14.775	437.267	No results	No results	Full match	0.619697	-0.690365	1.54795e-07	1	1.27341	down
Com_593_neg	cis-5,8,11,14,17-Eicosapentaenoic acid	C20 H30 O2	302.225	14.817	301.217	Full match	No results	Full match	0.613092	-0.705825	1.62218e-07	1	1.29325	down
Com_2201_neg	Gentiopicrin	C16 H20 O9	356.111	2.926	355.104	No results	Full match	Full match	1.75753	0.813547	1.6578e-07	1	1.27744	up
Com_10504_neg	Polygalaxanthon VIII	C25 H28 O15	568.144	7.544	283.065	No results	No results	Full match	0.430268	-1.21669	1.79881e-07	1	1.28246	down
Com_4119_neg	PA (15:1/18:3)	C36 H63 O8 P	654.427	16.58	653.42	No results	Full match	No results	0.17469	-2.51713	1.93892e-07	1	1.27688	down
Com_5795_neg	Neodiosmin	C28 H32 O15	608.175	10.151	607.168	No results	No results	Full match	2.06268	1.04452	2.04817e-07	1	1.30226	up
Com_11659_neg	Methylophiopogonone A	C19 H16 O6	340.096	7.981	339.089	No results	No results	Full match	0.342313	-1.54661	3.49694e-07	1	1.26807	down
Com_15013_neg	Farnesyl pyrophosphate	C15 H28 O7 P2	382.13	10.874	381.123	Full match	No results	No results	12.1058	3.59763	3.66832e-07	1	1.30047	up
Com_7934_neg	2-Methylbutyl beta-D-glucopyranoside	C11 H22 O6	204.137	8.783	249.135	Invalid mass	No results	No results	0.472734	-1.0809	4.12565e-07	1	1.28025	down
Com_9274_neg	N-(2-chloro-6-methylphenyl)-N'-(1,2-diphenylethyl)thiourea	C22 H21 Cl N2 S	380.115	9.789	379.107	Invalid mass	No results	No results	10.5087	3.39351	4.25271e-07	1	1.30209	up
Com_12334_neg	尾-D-Fructose 6-phosphate	C6 H13 O9 P	520.056	7.232	519.049	Invalid mass	No results	No results	1.88909	0.91769	4.33445e-07	1	1.28425	up
Com_5753_neg	20-Hydroxy prostaglandin F2伪	C20 H34 O6	812.42	10.711	405.203	Invalid mass	No results	No results	12.0132	3.58655	4.57625e-07	1	1.30208	up
Com_3977_neg	Stylopine	C19 H17 N O4	323.115	10.197	322.108	No results	No results	Full match	0.207257	-2.27051	4.81895e-07	1	1.29846	down
Com_17654_neg	N-Acetyltryptamine	C12 H14 N2 O	202.111	4.12	201.104	No results	No results	Full match	1.72732	0.788537	4.94005e-07	1	1.27042	up
Com_3507_neg	Carminic acid	C22 H20 O13	492.095	9.034	491.087	Invalid mass	No results	No results	4.36651	2.12648	5.39679e-07	1	1.29734	up
Com_11104_neg	N-{6-[4-(tert-butyl)phenoxy]-3-pyridinyl}-4-(trifluoromethyl)benzamide	C23 H21 F3 N2 O2	414.157	10.928	413.149	Full match	No results	No results	0.210012	-2.25145	5.51771e-07	1	1.26883	down
Com_5068_neg	TBHQ	C10 H14 O2	166.1	8.046	165.092	No results	No results	Full match	1.51227	0.59672	5.70133e-07	1	1.28048	up
Com_17255_neg	Dicoumarol	C19 H12 O6	336.062	3.846	335.054	No results	No results	Full match	1.77211	0.825466	6.2069e-07	1	1.27332	up
Com_8047_neg	Sulfosalicylic acid	C7 H6 O6 S	217.989	1.346	216.982	No results	No results	Full match	0.656635	-0.606836	6.7874e-07	1	1.26102	down
Com_11719_neg	Thromoboxane B1	C20 H36 O6	408.229	14.468	407.221	Invalid mass	No match	No results	0.255165	-1.9705	7.18915e-07	1	1.27166	down
Com_11451_neg	Tricin O-malonylhexoside	C26 H26 O15	578.129	9.46	577.121	No results	No results	Full match	1.96117	0.971712	7.44825e-07	1	1.28831	up
Com_766_neg	Coniferyl alcohol	C10 H12 O3	180.079	7.36	179.072	No results	Full match	Full match	0.466774	-1.0992	7.76587e-07	1	1.30119	down
Com_7873_neg	Oleuropein	C25 H32 O13	540.186	9.867	1079.36	No results	No results	Full match	3.806	1.92827	8.00054e-07	1	1.26312	up
Com_20108_neg	Oxyresveratrol	C14 H12 O4	244.074	10.968	243.067	No results	No results	Full match	1.63594	0.71012	8.15441e-07	1	1.26867	up
Com_10540_neg	N'-(4-methoxybenzoyl)-2-[(1-naphthylmethyl)thio]acetohydrazide	C21 H20 N2 O3 S	380.115	9.65	379.107	Invalid mass	No results	No results	2.66313	1.41313	8.30881e-07	1	1.29302	up
Com_14621_neg	3-[4-(tert-butyl)anilino]-2-(3-thienylcarbonyl)acrylonitrile	C18 H18 N2 O S	310.119	4.15	309.112	Invalid mass	No results	No match	1.50819	0.592822	8.51798e-07	1	1.25699	up
Com_10127_neg	Sec-O-Glucosylhamaudol	C21 H26 O10	438.153	7.127	437.146	No results	No results	Full match	0.552901	-0.854906	8.83292e-07	1	1.27016	down
Com_18427_neg	JWH 250 N-pentanoic acid metabolite	C22 H23 N O4	401.133	6.086	400.125	Invalid mass	No results	No results	2.55148	1.35134	8.92985e-07	1	1.27663	up
Com_667_neg	Caffeic acid O-glucoside	C15 H18 O9	342.096	2.611	341.088	No results	No results	Full match	2.32895	1.21968	9.27815e-07	1	1.26891	up
Com_6298_neg	Harpagide	C15 H24 O10	364.137	8.678	363.13	No results	No results	Full match	3.40996	1.76976	9.51362e-07	1	1.25716	up
Com_19813_neg	Gly-Tyr-Ala	C14 H19 N3 O5	309.133	7.336	308.126	No results	No results	Full match	2.02115	1.01518	1.0054e-06	1	1.25684	up
Com_20169_neg	Astragalus polyphenols	C20 H22 O9	406.128	7.537	405.12	No results	No results	Full match	1.65122	0.723533	1.04713e-06	1	1.26481	up
Com_1294_neg	Yuheinoside	C16 H24 O9	360.143	8.181	359.136	No results	No results	Full match	2.62757	1.39373	1.06536e-06	1	1.29304	up
Com_12354_neg	Aminophylline	C16 H24 N10 O4	420.2	6.392	419.193	No results	No results	Full match	0.322259	-1.63371	1.09656e-06	1	1.29034	down
Com_6925_neg	13,14-dihydro-15-keto-tetranor Prostaglandin F1尾	C16 H28 O5	300.194	9.872	299.186	Full match	No results	No results	3.74195	1.90379	1.15658e-06	1	1.29413	up
Com_9925_neg	Levodopa	C9 H11 N O4	197.069	1.431	196.062	No results	No results	Full match	0.495557	-1.01288	1.22323e-06	1	1.26201	down
Com_12425_neg	5,6-dimethyl-3-[5-(trifluoromethyl)pyridin-2-yl]-1,2,4-triazine	C11 H9 F3 N4	254.083	2.599	253.076	Invalid mass	No results	No results	3.38949	1.76107	1.30911e-06	1	1.28104	up
Com_905_neg	Androsin	C15 H20 O8	328.116	7.477	327.109	No results	No results	Full match	0.524096	-0.932098	1.39176e-06	1	1.29464	down
Com_6175_neg	Nitidine	C21 H18 N O4	348.124	7.263	347.117	No results	No results	Full match	1.52869	0.612292	1.75799e-06	1	1.27336	up
Com_9572_neg	D-beta-Homophenylalanine	C10 H13 N O2	179.095	1.822	178.087	No results	No results	Full match	0.432536	-1.20911	1.8836e-06	1	1.26696	down
Com_4248_neg	Wulignan A1	C20 H22 O5	342.147	8.864	341.14	No results	No results	Full match	12.3023	3.62086	1.94617e-06	1	1.29836	up
Com_22402_neg	8,12-iso-iPF2伪-VI	C20 H34 O5	390.216	10.906	389.209	Invalid mass	No results	No results	7.74845	2.95391	2.01518e-06	1	1.27718	up
Com_9870_neg	D-Mannose 6-phosphate	C6 H13 O9 P	260.028	7.395	259.021	Invalid mass	No results	No results	2.91126	1.54165	2.01601e-06	1	1.29405	up
Com_6403_neg	ADP-ribose	C15 H23 N5 O14 P2	559.072	9.25	558.065	No results	No results	Full match	0.161132	-2.63368	2.21276e-06	1	1.29535	down
Com_6788_neg	MGDG (8:0/18:3)	C35 H60 O10	700.44	15.662	699.432	No results	Invalid mass	No results	0.435385	-1.19964	2.35597e-06	1	1.24431	down
Com_4830_neg	Oleoyl-L-伪-lysophosphatidic acid	C21 H41 O7 P	436.26	14.656	435.252	Full match	Full match	No results	0.229725	-2.12202	2.36169e-06	1	1.24933	down
Com_1021_neg	Methyl linoleate	C19 H34 O2	294.256	15.005	293.249	No results	No results	Full match	0.171372	-2.54479	2.37538e-06	1	1.29122	down
Com_5252_neg	Luteolin	C15 H10 O6	286.048	8.844	285.041	Full match	Full match	Full match	0.227301	-2.13733	2.38929e-06	1	1.29672	down
Com_4937_neg	12-Oxo phytodienoic acid	C18 H28 O3	292.204	12.662	291.197	Full match	No results	No results	0.554106	-0.851767	2.41356e-06	1	1.27018	down
Com_1287_neg	(卤)9-HpODE	C18 H32 O4	624.461	15.808	623.454	Invalid mass	No results	No results	0.371349	-1.42915	2.51118e-06	1	1.26919	down
Com_23494_neg	C-hexosyl-apigenin O-feruloylhexoside	C37 H38 O18	770.208	10.039	769.201	No results	No results	Full match	0.268661	-1.89614	3.63932e-06	1	1.24556	down
Com_14639_neg	7-(4-methylpiperazino)pyrimido[4,5-d]pyrimidine-2,4(1H,3H)-dithione	C11 H14 N6 S2	294.074	10.485	293.067	Invalid mass	No results	No results	1.76343	0.818382	3.67524e-06	1	1.26392	up
Com_1569_neg	Tubuloside A	C37 H48 O21	828.271	8.4	827.264	No results	No results	Full match	2.27248	1.18426	3.69794e-06	1	1.28424	up
Com_3424_neg	PA (15:1/18:2)	C36 H65 O8 P	656.444	14.968	655.437	No results	Full match	No results	0.0902033	-3.47068	4.28421e-06	1	1.25588	down
Com_27465_neg	Aristolochic acids	C17 H11 N O7	341.055	6.37	340.047	No results	No results	Full match	0.399479	-1.32381	4.47579e-06	1	1.23886	down
Com_13216_neg	1-methyl-N-(4-piperidinophenyl)-1H-imidazole-4-sulfonamide	C15 H20 N4 O2 S	320.13	10.852	319.122	Full match	No results	No results	3.0334	1.60094	4.5303e-06	1	1.27889	up
Com_16787_neg	尾-Estradiol 3,17-disulfate	C18 H24 O8 S2	432.09	10.072	431.083	Full match	No results	No results	2.67558	1.41985	4.77867e-06	1	1.28625	up
Com_21818_neg	Chlorogenic acid	C16 H18 O9	354.099	9.221	353.092	Invalid mass	No results	No results	0.267303	-1.90345	6.54176e-06	1	1.23779	down
Com_8516_neg	Jionoside A1	C36 H48 O20	800.275	7.991	799.268	No results	No results	Full match	2.15827	1.10988	7.08149e-06	1	1.26515	up
Com_5835_neg	Calceolarioside B	C23 H26 O11	478.148	9.672	477.141	No results	No results	Full match	0.484842	-1.04441	7.32671e-06	1	1.23871	down
Com_9004_neg	S-Lactoyglutathione	C13 H21 N3 O8 S	379.106	8.288	378.099	No results	No results	Full match	1.56526	0.646404	7.58392e-06	1	1.22889	up
Com_456_neg	Saikosaponin B2	C42 H68 O13	780.468	15.119	779.46	No results	No results	Full match	0.43588	-1.198	7.66916e-06	1	1.22821	down
Com_7337_neg	trans-3,5-Dimethoxy-4-hydroxycinnamaldehyde	C11 H12 O4	208.074	7.937	207.067	No results	No results	Full match	0.528911	-0.918902	7.95775e-06	1	1.25211	down
Com_7741_neg	Acetylharpagide	C17 H26 O11	406.148	7.816	405.141	No results	No results	Full match	1.68433	0.752173	8.74754e-06	1	1.26463	up
Com_5297_neg	N-Sinapoylagmatine	C16 H24 N4 O4	336.179	8.086	335.172	No results	No results	Full match	0.603507	-0.728558	9.31449e-06	1	1.2513	down
Com_21754_neg	C-hexosyl-chrysoeriol O-feruloylhexoside	C38 H40 O19	800.216	9.8	399.101	No results	No results	Full match	0.250456	-1.99737	9.56939e-06	1	1.28704	down
Com_18914_neg	OxPG (18:1-20:5+1O(1Cyc))	C44 H73 O11 P	808.499	16.206	807.491	No results	Invalid mass	No results	0.265159	-1.91507	1.04827e-05	1	1.265	down
Com_2548_neg	11(Z),14(Z)-Eicosadienoic Acid	C20 H36 O2	308.272	15.211	307.265	Full match	No results	No results	0.450224	-1.15128	1.12435e-05	1	1.22905	down
Com_5301_neg	Ptaquiloside	C20 H30 O8	398.195	7.793	397.187	No results	No results	Full match	1.56028	0.641801	1.1604e-05	1	1.24591	up
Com_1419_neg	2-Aminoadipic acid	C6 H11 N O4	161.069	1.514	160.062	No results	No results	Full match	1.87384	0.906	1.28734e-05	1	1.25943	up
Com_8493_neg	13Z,16Z-Docosadienoic Acid	C22 H40 O2	336.303	15.697	335.296	Full match	No results	No results	0.259319	-1.9472	1.30802e-05	1	1.2683	down
Com_12577_neg	Parishin E	C19 H24 O13	460.123	6.821	459.115	No results	No results	Full match	2.09796	1.06899	1.31018e-05	1	1.23902	up
Com_13910_neg	Coptisine	C19 H14 N O4	320.093	8.724	319.086	No results	No results	Full match	1.81799	0.862348	1.39093e-05	1	1.23678	up
Com_10150_neg	N-Caffeoylagmatine	C14 H20 N4 O3	292.153	8.785	291.145	No results	No results	Full match	0.466653	-1.09958	1.61823e-05	1	1.21531	down
Com_2828_neg	Angoroside C	C36 H48 O19	784.281	8.399	783.273	No results	No results	Full match	2.21416	1.14676	1.86005e-05	1	1.26997	up
Com_6430_neg	Arctigenin-4'-O-beta-Gentiobioside	C33 H44 O16	696.263	8.723	695.254	No results	No results	Full match	1.6131	0.689838	2.03944e-05	1	1.2148	up
Com_21030_neg	Sarsasapogenin	C27 H44 O3	416.33	14.106	415.322	No results	No results	Full match	0.504641	-0.986671	2.20461e-05	1	1.23526	down
Com_5269_neg	Arbutin	C12 H16 O7	272.09	2.674	271.083	Full match	Full match	Full match	0.618814	-0.692422	2.85745e-05	1	1.27169	down
Com_22206_neg	Eriodictyol O-malonylhexoside	C24 H24 O14	536.116	7.761	535.108	No results	No results	Full match	0.481544	-1.05426	3.01178e-05	1	1.19921	down
Com_21935_neg	Vaccarin	C32 H38 O19	726.203	8.61	725.197	No results	No results	Full match	2.11191	1.07855	3.18536e-05	1	1.25028	up
Com_6779_neg	Oridonin	C20 H28 O6	364.188	13.033	363.181	No results	No results	Full match	2.38751	1.25551	3.24801e-05	1	1.26107	up
Com_601_neg	11(E)-Eicosenoic Acid	C20 H38 O2	310.288	15.542	309.28	Full match	No results	No results	0.377222	-1.40652	3.4133e-05	1	1.23475	down
Com_645_neg	trans-10-Heptadecenoic Acid	C17 H32 O2	268.241	14.804	267.233	Full match	No results	No results	0.602206	-0.731671	3.51046e-05	1	1.26532	down
Com_3269_neg	Salidroside	C14 H20 O7	300.121	7.295	299.114	No results	Full match	Full match	2.04703	1.03353	3.57009e-05	1	1.2058	up
Com_6511_neg	LPA 16:0	C19 H39 O7 P	410.243	14.623	409.236	No results	Full match	Full match	0.159927	-2.64452	3.69428e-05	1	1.22145	down
Com_6014_neg	N-Acetyl-L-Tyrosine	C11 H13 N O4	223.085	1.519	222.078	No results	No results	Full match	0.526142	-0.926477	3.766e-05	1	1.21933	down
Com_22998_neg	N-(2-oxo-3-azepanyl)benzenesulfonamide	C12 H16 N2 O3 S	268.083	4.12	267.076	Invalid mass	No results	No results	1.81479	0.859806	3.80425e-05	1	1.20458	up
Com_23595_neg	Protoporphyrin IX	C34 H34 N4 O4	562.258	14.23	561.251	Full match	No results	No results	0.440144	-1.18395	3.84885e-05	1	1.22092	down
Com_6078_neg	Chrysin	C15 H10 O4	254.058	10.555	253.051	Full match	No results	Full match	3.02206	1.59553	3.86832e-05	1	1.26863	up
Com_11388_neg	D-Xylulose	C5 H10 O5	150.053	14.469	149.046	No results	No results	Full match	0.659245	-0.601114	4.04643e-05	1	1.19222	down
Com_5541_neg	8Z,11Z,14Z-Eicosatrienoic acid	C20 H34 O2	306.256	14.901	305.249	Full match	No results	No results	0.434237	-1.20344	5.54998e-05	1	1.26627	down
Com_19918_neg	FAHFA (2:0/22:1)	C24 H44 O4	396.324	15.485	395.317	No results	Full match	No results	0.400232	-1.32109	5.59244e-05	1	1.21981	down
Com_6384_neg	4-O-p-Coumaroylquinic acid	C16 H18 O8	338.101	9.881	337.093	No results	No results	Full match	0.648672	-0.624439	6.48244e-05	1	1.18539	down
Com_12237_neg	FAHFA (18:2/20:4)	C38 H62 O4	582.463	14.717	581.456	No results	Full match	No results	0.566593	-0.819616	6.59586e-05	1	1.18437	down
Com_7692_neg	N-[(-)-Jasmonoyl]-(L)-Isoleucine	C18 H29 N O4	323.21	11.681	322.203	No results	No results	Full match	0.615896	-0.699241	7.09797e-05	1	1.23214	down
Com_5031_neg	Sanguinarine	C20 H14 N O4	332.092	9.25	663.177	No results	No results	Full match	0.391349	-1.35347	7.59072e-05	1	1.22723	down
Com_3155_neg	Ligustroflavone	C33 H40 O18	724.223	9.528	723.216	No results	No results	Full match	0.529965	-0.91603	8.17807e-05	1	1.18561	down
Com_6714_neg	MGDG (16:3/18:3)	C43 H70 O10	806.52	16.64	805.512	No results	Invalid mass	No results	0.464831	-1.10522	8.94125e-05	1	1.17436	down
Com_5409_neg	Trehalose	C12 H22 O11	402.137	8.877	401.13	No results	Invalid mass	No results	1.93814	0.954673	9.38922e-05	1	1.25868	up
Com_2290_neg	Citric acid	C6 H8 O7	192.023	15.237	191.016	Invalid mass	Invalid mass	No results	0.414692	-1.26989	9.62865e-05	1	1.19764	down
Com_21420_neg	11-Dehydro thromboxane B2	C20 H32 O6	404.194	10.287	403.186	Invalid mass	No results	No results	1.70387	0.768818	9.63756e-05	1	1.17061	up
Com_18426_neg	4',7-Di-O-methylnaringenin	C17 H16 O5	300.1	10.587	299.093	No results	Full match	Full match	0.473235	-1.07937	0.000122157	1	1.2379	down
Com_10977_neg	PMeOH (18:2-18:3)	C40 H69 O8 P	708.469	16.797	707.462	No results	Invalid mass	No results	0.0207364	-5.59169	0.000126979	1	1.25463	down
Com_8056_neg	GlcADG (18:1-18:3)	C45 H76 O11	792.541	15.837	791.533	No results	Full match	No results	0.348881	-1.51919	0.000137432	1	1.22169	down
Com_1490_neg	p-Aminocinnamic acid	C9 H9 N O2	163.064	1.53	162.056	No results	No results	Full match	0.326354	-1.61549	0.000145183	1	1.23366	down
Com_26431_neg	3-Hydroxy-9,10-Dimethoxypterocarpan	C17 H16 O5	300.1	12.051	299.093	No results	No results	Full match	0.562408	-0.83031	0.000153698	1	1.22714	down
Com_7231_neg	Geniposidic acid	C16 H22 O10	374.122	7.716	373.115	Full match	No results	Full match	3.33509	1.73772	0.000189085	1	1.16999	up
Com_20_neg	Elaidic acid	C18 H34 O2	282.256	15.045	281.249	Full match	No results	Full match	0.612872	-0.706343	0.000196576	1	1.22532	down
Com_2695_neg	PEtOH (13:1-18:2)	C36 H65 O8 P	656.451	15.346	655.444	No results	Invalid mass	No results	0.533012	-0.907761	0.000211448	1	1.20012	down
Com_10490_neg	尾-Muricholic acid	C24 H40 O5	454.297	15.089	453.289	Invalid mass	No results	No results	0.554994	-0.849455	0.000216843	1	1.19857	down
Com_575_neg	4-Hydroxybenzaldehyde	C7 H6 O2	122.037	8.188	121.03	Full match	Full match	Full match	1.50646	0.591167	0.000228557	1	1.16251	up
Com_3031_neg	Astragaloside IV	C41 H68 O14	784.463	14.719	783.456	No results	No results	Full match	0.57167	-0.806744	0.000238112	1	1.169	down
Com_7747_neg	Icariin	C33 H40 O15	676.238	8.767	675.229	No results	No results	Full match	2.73396	1.45099	0.000251012	1	1.2224	up
Com_10568_neg	Tricin 4'-O-(beta-guaiacylglyceryl) ether 5-O-hexoside	C33 H36 O16	688.2	8.758	687.191	No results	No results	Full match	0.520494	-0.942046	0.000255347	1	1.17301	down
Com_24526_neg	Rebaudioside A	C44 H70 O23	966.429	11.487	965.422	No results	No results	Full match	0.153942	-2.69954	0.000257658	1	1.2352	down
Com_1090_neg	N-Oleoyl Glycine	C20 H37 N O3	339.278	14.91	338.271	No results	No results	Full match	0.512133	-0.965409	0.00027735	1	1.19507	down
Com_10993_neg	Rhaponticin	C21 H24 O9	420.141	7.607	419.134	No results	Full match	Full match	2.1021	1.07183	0.000277592	1	1.14363	up
Com_7773_neg	(2E)-4-Hydroxy-3,7-dimethyl-2,6-octadien-1-yl beta-D-glucopyranoside	C16 H28 O7	378.189	8.5	377.182	Invalid mass	No results	No results	0.316243	-1.6609	0.000315187	1	1.22471	down
Com_4509_neg	Tenuifolin	C36 H56 O12	680.378	12.853	679.373	No results	No results	Full match	1.94665	0.960995	0.000318543	1	1.198	up
Com_2098_neg	Eriodictyol-7-O-glucoside	C21 H22 O11	450.117	9.246	449.11	No results	No results	Full match	8.63818	3.11073	0.000321787	1	1.21758	up
Com_8793_neg	Purpureaside C	C35 H46 O20	786.26	8.212	785.25	No results	No results	Full match	2.80445	1.48772	0.000332842	1	1.22059	up
Com_13952_neg	FAHFA (2:0/18:0)	C20 H38 O4	342.278	15.251	341.27	No results	Full match	No results	0.426247	-1.23024	0.000381493	1	1.15983	down
Com_8184_neg	LPA 16:1	C19 H37 O7 P	408.228	14.385	407.221	No results	Full match	No results	0.382821	-1.38526	0.000384536	1	1.12737	down
Com_13488_neg	PA (16:0/15:1)	C34 H65 O8 P	632.45	15.464	631.442	No results	Invalid mass	No results	0.311512	-1.68264	0.000391313	1	1.14377	down
Com_341_neg	Arachidic acid	C20 H40 O2	312.303	15.962	311.296	Full match	No results	Full match	0.510601	-0.969731	0.000398529	1	1.19169	down
Com_20509_neg	4,5-DCQA Isochlorogenic acid C	C25 H24 O12	516.128	10.08	515.121	No results	No results	Full match	0.462394	-1.1128	0.000400782	1	1.16515	down
Com_7693_neg	Timosaponin BII	C45 H76 O19	920.495	16.263	919.487	No results	No results	Full match	0.464519	-1.10619	0.000418162	1	1.18936	down
Com_12930_neg	Methyl linolenate	C19 H32 O2	292.241	14.471	291.234	No results	No results	Full match	1.81227	0.857799	0.000454171	1	1.13504	up
Com_3134_neg	PA (15:0/18:3)	C36 H65 O8 P	656.443	14.62	655.436	No results	Full match	No results	0.167091	-2.58129	0.000491765	0.972222	1.15935	down
Com_715_neg	Morellic acid	C33 H36 O8	560.243	14.839	559.236	No results	Full match	No results	0.546559	-0.87155	0.000530175	1	1.2032	down
Com_2346_neg	OxPG (16:0-20:4+1O(1Cyc))	C42 H73 O11 P	784.499	15.694	783.491	No results	Invalid mass	No match	0.4962	-1.01101	0.00054275	0.972222	1.13937	down
Com_8642_neg	Polygalaxanthone 鈪?C26 H30 O15	582.16	8.441	581.153	No results	No results	Full match	2.80083e+06	-1.6998	0.000575985	1	1.20502	down
Com_26932_neg	Typhaneoside	C34 H42 O20	770.227	7.14	769.22	No results	No results	Full match	0.234934	-2.08967	0.000615124	1	1.19447	down
Com_1597_neg	Pseudoginsenoside-RT5	C36 H62 O10	654.436	15.062	653.429	No results	No results	Full match	0.611655	-0.70921	0.00061996	1	1.15211	down
Com_8867_neg	1-(2,4-dihydroxyphenyl)-2-(3,5-dimethoxyphenyl)propan-1-one	C17 H18 O5	302.116	8.019	301.108	Full match	No results	Full match	0.57911	-0.788091	0.00062927	1	1.19153	down
Com_10658_neg	Polygalic acid	C29 H44 O6	488.315	15.379	487.308	No results	No results	Full match	0.478458	-1.06354	0.000632318	1	1.17085	down
Com_18614_neg	Polypodine B	C27 H44 O8	496.305	12.885	495.299	No results	No results	Full match	1.63892	0.712746	0.000641214	1	1.10232	up
Com_4976_neg	3,4,5-trihydroxy-6-methyloxan-2-yl 2-(methylamino)benzoate	C14 H19 N O6	594.249	14.522	593.241	Invalid mass	No results	No results	0.496587	-1.00988	0.000679448	1	1.13682	down
Com_5041_neg	di-C,C-pentosyl-apigenin	C25 H26 O13	534.138	8.753	533.131	No results	No results	Full match	0.378223	-1.40269	0.000712726	1	1.10794	down
Com_3816_neg	Sibirioside A	C21 H28 O12	472.159	10.12	471.152	No results	No results	Full match	3.74006	1.90306	0.000719572	1	1.14751	up
Com_523_neg	Picroside I	C24 H28 O11	492.162	9.878	491.155	No results	No results	Full match	0.336484	-1.57139	0.000739819	1	1.106	down
Com_17961_neg	Shanzhiside	C16 H24 O11	392.132	7.778	391.125	No results	Full match	No results	0.360114	-1.47347	0.000741691	1	1.09325	down
Com_17288_neg	Wighteone	C20 H18 O5	338.116	9.119	337.109	No results	No results	Full match	0.480711	-1.05676	0.000765378	1	1.18844	down
Com_240_neg	PE (18:2/18:2)	C41 H74 N O8 P	739.517	16.576	738.509	No results	Full match	No results	0.483115	-1.04956	0.000776376	0.972222	1.10063	down
Com_9562_neg	L-Tryptophan	C11 H12 N2 O2	204.09	4.119	203.083	No results	No results	Full match	1.50731	0.591974	0.000815835	1	1.14071	up
Com_335_neg	Docosanoic acid	C22 H44 O2	340.335	16.565	339.327	Full match	No results	Full match	0.4775	-1.06643	0.000834533	1	1.15352	down
Com_11403_neg	Dipotassium glycyrrhizinate	C42 H60 O16	822.395	12.573	821.39	No results	Invalid mass	No results	1.76973	0.823527	0.00100133	1	1.17493	up
Com_17833_neg	Aempferol-3-O-rutinoside	C27 H30 O15	594.16	10.405	593.153	No results	No results	Full match	1.56193	0.643331	0.00105461	1	1.10091	up
Com_7738_neg	Mycophenolic acid	C17 H20 O6	320.13	8.831	319.122	Invalid mass	No results	No results	1.54809	0.630486	0.00113467	1	1.12427	up
Com_20660_neg	Cyanidin-3-O-glucoside	C21 H21 Cl O11	484.077	9.08	483.07	No results	No results	Full match	2.19654	1.13523	0.0011677	1	1.17524	up
Com_4303_neg	Tetranor-12R-HETE	C16 H26 O3	266.189	15.548	265.181	Full match	No results	No results	0.506714	-0.980757	0.00120715	1	1.118	down
Com_1984_neg	L-Histidine	C6 H9 N3 O2	155.07	1.466	154.063	Full match	Full match	Full match	0.46394	-1.10799	0.00161036	0.972222	1.08667	down
Com_4928_neg	6''-o-acetylgenistin	C23 H22 O11	474.117	7.421	473.109	No results	No results	Full match	5.04626	2.33521	0.00166351	1	1.15377	up
Com_2747_neg	PA (18:2/18:3)	C39 H67 O8 P	694.45	15.077	693.443	No results	Invalid mass	No results	0.652543	-0.615856	0.00176865	1	1.11035	down
Com_15456_neg	PC (16:0/18:3)	C42 H78 N O8 P	815.574	16.817	814.566	No results	Invalid mass	No results	0.290818	-1.78181	0.00177445	0.944444	1.04879	down
Com_4150_neg	FAHFA (22:0/2:0)	C24 H46 O4	398.339	16.267	397.332	No results	Full match	No results	0.447022	-1.16158	0.00179247	1	1.12374	down
Com_22190_neg	Asiaticoside	C48 H78 O19	958.514	14.592	957.506	No results	No results	Full match	0.468054	-1.09525	0.0018647	1	1.12409	down
Com_13656_neg	OxPE (18:1-18:1+1O(1Cyc))	C41 H76 N O9 P	757.526	15.656	756.521	No results	Full match	No results	0.49104	-1.02609	0.0019141	0.972222	1.05126	down
Com_10330_neg	Epimedin C	C39 H50 O19	822.296	8.113	821.29	No results	No results	Full match	2.50715	1.32605	0.00193429	0.972222	1.04522	up
Com_10719_neg	Isovitexin	C21 H20 O10	432.11	7.19	431.102	No results	Invalid mass	No results	0.138857	-2.84833	0.00204931	1	1.12958	down
Com_22685_neg	Protopanaxadiol	C30 H52 O3	460.393	16.444	459.385	No results	No results	Full match	0.403493	-1.30939	0.00267878	0.972222	1.10342	down
Com_15459_neg	OxPG (16:0-20:5+1O(1Cyc))	C42 H71 O11 P	782.487	16.226	781.48	No results	Invalid mass	No results	2.7185	1.44281	0.00362522	0.916667	1.04363	up
Com_7988_neg	PG (18:2/18:2)	C42 H75 O10 P	770.518	15.367	769.51	No results	Invalid mass	No results	0.412091	-1.27896	0.0038824	0.944444	1.02564	down
Com_5632_neg	beta-Tocopherol	C28 H48 O2	416.366	15.63	415.359	No results	No results	Full match	0.662742	-0.593481	0.00400191	1	1.06345	down
Com_5810_neg	PS (16:0/18:2)	C40 H74 N O10 P	759.51	15.821	758.503	No results	Invalid mass	No results	0.370909	-1.43086	0.00448677	0.916667	1.01524	down
Com_733_neg	PE (22:5e/18:3)	C45 H76 N O7 P	773.53	15.136	772.523	No results	Invalid mass	No results	0.524758	-0.930276	0.00471214	0.972222	1.06627	down
Com_1127_neg	Lignoceric Acid	C24 H48 O2	368.366	15.229	367.359	Full match	No results	No results	0.475956	-1.0711	0.00546362	0.888889	1.03121	down
Com_14627_neg	Dihydrofolic acid	C19 H21 N7 O6	443.157	7.923	442.15	No results	No results	Full match	1.59548	0.673988	0.00623983	0.888889	1.01291	up
Com_12339_neg	Limocitrin O-hexoside	C23 H24 O13	508.123	8.028	507.116	No results	No results	Full match	0.28708	-1.80048	0.00649283	1	1.0635	down
Com_23270_neg	PA (16:1/18:3)	C37 H65 O8 P	668.448	15.073	667.441	No results	Invalid mass	No results	0.389258	-1.3612	0.0065947	0.972222	1.01439	down
Com_6762_neg	3-[3-(beta-D-Glucopyranosyloxy)-2-methoxyphenyl]propanoic acid	C16 H22 O9	358.127	5.313	357.12	Full match	No results	Full match	1.59603	0.674486	0.00715267	0.944444	1.04946	up
Com_24828_neg	Myricetin 3-O-galactoside	C21 H20 O13	480.089	6.103	479.082	No results	No results	Full match	1.90026	0.926199	0.00766648	1	1.0371	up
Com_225_neg	Salicylic acid O-glucoside	C13 H16 O8	300.085	3.844	299.077	No results	No results	Full match	1.80292	0.850338	0.0087582	1	1.0411	up
Com_10434_neg	albiflorin	C23 H28 O11	526.169	10.321	525.162	Invalid mass	No results	No results	1.52639	0.610124	0.00904832	0.861111	1.03375	up
Com_2227_neg	Quercetin-3尾-D-glucoside	C21 H20 O12	464.096	9.45	463.089	Full match	Full match	Full match	2.21103	1.14472	0.0101235	1	1.00164	up
