# Supplementary material for: Metabolomic Analysis of the Response of Haloxylon ammodendron and Haloxylon persicum to Drought
Source: MDPI journal article supplement (doi:10.3390/ijms24109099), 2023-05-22
Supplement: s1 [file Table S3.xlsx]

## Sheet: LB vs. HB_pos
Differential metabolites in Haloxylon persicum under positive ion mode
ID	Name	Formula	Molecular Weight	RT [min]	m/z	mzCloud_Results	mzVault_Results	MassList_Results	FC	log2FC	Pvalue	ROC	VIP	Up/Down
Com_3925_pos	Indole-3-butyric acid	C12 H13 N O2	203.095	6.78	204.102	Full match	No results	Full match	28.629	4.8394	5.89105e-16	1	1.22131	up
Com_392_pos	Monocrotaline	C16 H23 N O6	325.153	6.811	326.16	No results	No results	Full match	355.604	8.47413	7.15925e-16	1	1.22132	up
Com_261_pos	L-Dopa	C9 H11 N O4	197.069	1.953	198.076	Full match	Full match	Full match	240.93	7.91247	7.0413e-15	1	1.22149	up
Com_12523_pos	N'-{[(2-ethoxyanilino)carbonyl]oxy}-2-(1-naphthyl)ethanimidamide	C21 H21 N3 O3	385.138	6.126	386.145	Invalid mass	No results	No results	6.89138	2.78479	8.14204e-15	1	1.22106	up
Com_21_pos	Lysine butyrate	C10 H22 N2 O4	234.158	1.372	235.165	No results	No results	Full match	1.95217	0.965078	8.4954e-15	1	1.2208	up
Com_5818_pos	2-[3-(4-pyridyl)-1H-1,2,4-triazol-5-yl]pyridine	C12 H9 N5	223.085	1.966	224.092	Full match	No results	No match	31.3913	4.97229	1.03141e-14	1	1.22085	up
Com_5695_pos	3-[2-(3-Hydroxyphenyl)ethyl]-5-methoxyphenol	C15 H16 O3	244.114	11.045	245.121	Invalid mass	Invalid mass	No results	22.0272	4.46121	2.0992e-14	1	1.2216	up
Com_200_pos	alpha-Ketoglutaric acid	C5 H6 O5	146.022	2.188	147.029	No results	No results	Full match	2.34778	1.2313	3.43831e-14	1	1.22039	up
Com_1156_pos	4'-Methoxyacetophenone	C9 H10 O2	150.068	8.017	151.076	Full match	No results	Full match	13.6243	3.76811	5.49507e-14	1	1.22139	up
Com_3228_pos	2-({2-oxo-2-[(2-oxo-3-azepanyl)amino]ethyl}sulfanyl)acetic acid	C10 H16 N2 O4 S	260.088	2.437	261.095	Invalid mass	No results	No results	9.55252	3.25588	8.47449e-14	1	1.22075	up
Com_101_pos	p-Coumaric acid	C9 H8 O3	164.047	9.557	165.055	No results	Full match	Full match	0.54155	-0.884834	1.8988e-13	1	1.21995	down
Com_59_pos	Inositol	C6 H12 O6	180.064	1.343	203.053	No results	No results	Full match	2.27292	1.18454	3.09727e-13	1	1.21953	up
Com_7209_pos	2-[(carboxymethyl)(methyl)amino]-5-methoxybenzoic acid	C11 H13 N O5	239.08	1.522	240.087	Full match	No results	No results	12.9932	3.69969	3.27342e-13	1	1.21992	up
Com_161_pos	Eriodictyol-7-O-glucoside	C21 H22 O11	450.117	9.5	451.124	No results	No results	Full match	0.28348	-1.81868	6.95318e-13	1	1.21918	down
Com_4403_pos	Gallic acid trimethyl ether	C10 H12 O5	212.069	8.746	213.076	No results	Full match	Full match	7.38956	2.88549	7.41317e-13	1	1.2196	up
Com_514_pos	Furanodiene	C15 H20 O	216.152	11.684	217.159	No results	No results	Full match	0.196306	-2.34883	9.73559e-13	1	1.21911	down
Com_6246_pos	N1-(2,3-dihydro-1,4-benzodioxin-2-ylmethyl)-2,2-dimethylpropanamide	C14 H19 N O3	249.137	6.192	250.144	Full match	No results	No results	8.69967	3.12096	1.12502e-12	1	1.21925	up
Com_4131_pos	2-[(5-amino-4H-1,2,4-triazol-3-yl)thio]-1-(4-chlorophenyl)ethan-1-one	C10 H9 Cl N4 O S	268.02	5.513	269.027	Invalid mass	No results	No results	0.105295	-3.2475	1.82411e-12	1	1.21853	down
Com_4476_pos	N2,N2-Dimethylguanosine	C12 H17 N5 O5	311.123	6.481	312.13	No results	Full match	Full match	0.522187	-0.93736	2.68968e-12	1	1.21888	down
Com_6127_pos	5-(tert-butyl)-2-methyl-N-(4-nitrophenyl)-3-furamide	C16 H18 N2 O4	324.106	12.839	325.113	Invalid mass	No results	No results	3.67609	1.87817	2.73496e-12	1	1.21872	up
Com_10589_pos	1,7-bis(3,4-dihydroxyphenyl)heptan-3-one	C19 H22 O5	352.128	2.342	353.135	Invalid mass	No results	No results	22.4433	4.48821	2.76713e-12	1	1.21835	up
Com_911_pos	Dihydromethysticin	C15 H16 O5	276.1	8.424	277.107	Full match	No results	Full match	23.2933	4.54184	3.67126e-12	1	1.22107	up
Com_11206_pos	Amoxicillin	C16 H19 N3 O5 S	403.058	6.319	404.065	Invalid mass	No results	No results	83.8719	6.39012	3.80903e-12	1	1.22168	up
Com_2647_pos	3-hydroxy-3-methylpentanedioic acid	C6 H10 O5	184.035	1.272	185.042	Invalid mass	No results	No results	3.29195	1.71894	5.54917e-12	1	1.21778	up
Com_11242_pos	1-[(3,5-dimethylisoxazol-4-yl)sulfonyl]piperidine	C10 H16 N2 O3 S	244.085	11.257	245.092	Invalid mass	No results	No results	0.509614	-0.972525	6.16314e-12	1	1.21939	down
Com_486_pos	L-Phenylalanine	C9 H11 N O2	165.079	5.774	166.087	Full match	Full match	Full match	1.84561	0.884094	6.65947e-12	1	1.21942	up
Com_1810_pos	3,4-Dihydroxybenzaldehyde	C7 H6 O3	138.032	1.945	139.039	Full match	Full match	Full match	24.4104	4.60942	7.08084e-12	1	1.22052	up
Com_87_pos	Choline	C5 H13 N O	103.1	1.302	104.107	Full match	Full match	No results	2.15323	1.1065	8.57276e-12	1	1.21733	up
Com_2191_pos	2-piperidinobenzoic acid	C12 H15 N O2	205.111	6.254	206.118	Full match	No results	No results	9.70238	3.27834	8.98871e-12	1	1.21788	up
Com_5921_pos	(1E,4E)-1,5-bis(4-methoxyphenyl)penta-1,4-dien-3-one	C19 H18 O3	294.126	8.9	295.133	Full match	No results	Full match	0.312218	-1.67937	9.16965e-12	1	1.21726	down
Com_7947_pos	Vinblastine	C46 H58 N4 O9	810.423	13.498	811.43	No results	No results	Full match	0.118117	-3.08171	1.02455e-11	1	1.21728	down
Com_7577_pos	伪-Linolenoyl ethanolamide	C20 H35 N O2	321.267	14.541	322.274	Full match	No results	No results	0.238767	-2.06633	1.07636e-11	1	1.21686	down
Com_3344_pos	N-Acetylaspartate	C6 H9 N O5	175.048	2.144	176.056	No results	No results	Full match	3.23774	1.69499	1.22919e-11	1	1.21893	up
Com_13335_pos	Xanthotoxol	C11 H6 O4	202.027	3.851	203.034	No results	Full match	Full match	0.494672	-1.01545	1.28257e-11	1	1.21675	down
Com_3596_pos	Shikimic Acid	C7 H10 O5	174.053	6.635	175.06	No results	No results	Full match	2.33814	1.22536	1.29581e-11	1	1.21668	up
Com_4443_pos	Riboflavin	C17 H20 N4 O6	376.139	8.431	377.146	Full match	Full match	Full match	2.83042	1.50102	1.46156e-11	1	1.21944	up
Com_41_pos	18-尾-Glycyrrhetinic acid	C30 H46 O4	470.34	12.644	471.347	Full match	Full match	Full match	0.344001	-1.53952	1.51047e-11	1	1.21688	down
Com_3805_pos	Artemisinin	C15 H22 O5	282.147	11.806	283.154	Full match	Full match	Full match	6.63371	2.72981	1.75732e-11	1	1.21638	up
Com_849_pos	Prunin	C21 H22 O10	434.119	10.781	435.127	Full match	No results	Full match	4.17825	2.0629	1.8217e-11	1	1.21967	up
Com_2266_pos	Adenosine 3'5'-cyclic monophosphate	C10 H12 N5 O6 P	329.053	2.28	330.06	Full match	Full match	Full match	4.54944	2.18569	1.98758e-11	1	1.22034	up
Com_8875_pos	4-Hydroxy-L-Glutamic Acid	C5 H7 N O5	161.033	1.698	162.04	No results	No results	Full match	4.21694	2.0762	2.1077e-11	1	1.21973	up
Com_1861_pos	Linderane	C15 H16 O4	260.105	8.157	261.113	No results	No results	Full match	109.351	6.77282	2.39333e-11	1	1.22142	up
Com_23265_pos	2-(1,3-benzodioxol-5-yl)-6-chloro-4-phenylquinoline	C22 H14 Cl N O2	359.068	6.189	360.076	Invalid mass	No results	No results	9.68421	3.27563	2.54684e-11	1	1.21856	up
Com_6675_pos	4-acetyl-4-(ethoxycarbonyl)heptanedioic acid	C12 H18 O7	274.103	5.358	275.11	Invalid mass	No results	No results	6.13944	2.61811	3.36319e-11	1	1.21745	up
Com_3450_pos	5-(6-hydroxy-6-methyloctyl)-2,5-dihydrofuran-2-one	C13 H22 O3	208.147	8.647	209.154	Invalid mass	No results	No results	4.09514	2.03391	3.37613e-11	1	1.21604	up
Com_21186_pos	6-styryl-3-phenyl-2,5-dihydro-1,2,4-triazin-5-one	C17 H13 N3 O	275.107	5.372	276.114	Full match	No results	No results	7.1998	2.84796	3.63041e-11	1	1.21546	up
Com_4991_pos	Khasianine	C39 H63 N O11	721.441	13.451	722.449	No results	No results	Full match	1.57757	0.657704	5.48393e-11	1	1.21513	up
Com_2800_pos	Maltopentaose	C30 H52 O26	850.252	8.942	851.259	Invalid mass	No results	No results	41.6458	5.3801	5.73166e-11	1	1.22158	up
Com_5435_pos	2-(cyclopropylcarbonyl)-3-(4-fluoroanilino)acrylonitrile	C13 H11 F N2 O	268.042	1.451	269.049	Invalid mass	No results	No results	3.92568	1.97294	7.42644e-11	1	1.21781	up
Com_170_pos	Isorhamnetin	C16 H12 O7	316.058	10.239	317.066	Full match	Full match	Full match	7.59934	2.92587	8.46e-11	1	1.2201	up
Com_997_pos	Methyl cinnamate	C10 H10 O2	162.068	8.423	163.076	Full match	No results	Full match	3.24201	1.69689	9.37069e-11	1	1.21541	up
Com_1423_pos	Eugenol	C10 H12 O2	164.084	8.703	165.091	Full match	No results	Full match	3.00767	1.58865	1.09676e-10	1	1.21663	up
Com_1319_pos	3-Acetyl-11-keto-尾-boswellic acid	C32 H48 O5	512.351	11.689	513.358	Full match	Full match	Full match	0.18723	-2.41712	1.32487e-10	1	1.2184	down
Com_15188_pos	4-(2,3-dihydro-1,4-benzodioxin-6-yl)butanoic acid	C12 H14 O4	222.088	7.423	223.095	Invalid mass	No results	No results	35.7593	5.16025	1.57719e-10	1	1.21549	up
Com_279_pos	Trigonelline	C7 H7 N O2	137.048	1.423	138.055	Full match	Full match	Full match	0.466632	-1.09964	1.81143e-10	1	1.21663	down
Com_1099_pos	Enilconazole	C14 H14 Cl2 N2 O	296.051	2.613	297.058	Invalid mass	No results	No results	0.390183	-1.35778	1.92916e-10	1	1.21396	down
Com_5890_pos	3-(3,4-dihydroxyphenyl)propanoic acid	C9 H10 O4	164.048	8.431	165.055	Invalid mass	No results	No match	2.62962	1.39486	2.21402e-10	1	1.21358	up
Com_7191_pos	Tricin 5-O-hexoside derivative	C24 H22 O14	534.102	10.16	535.109	No results	No results	Full match	0.586345	-0.770178	2.28605e-10	1	1.21268	down
Com_5241_pos	Abscisic Acid	C15 H20 O4	264.137	7.378	265.144	No results	No results	Full match	1.6477	0.72045	2.59377e-10	1	1.21413	up
Com_95_pos	伪-Lactose	C12 H22 O11	342.116	1.485	343.124	Full match	No results	Full match	1.97837	0.98431	2.66039e-10	1	1.21266	up
Com_1963_pos	D-Proline	C5 H9 N O2	115.064	1.468	116.071	No results	No results	Full match	1.63096	0.705718	4.91375e-10	1	1.21167	up
Com_7616_pos	Obscurolide A1	C15 H17 N O5	313.095	5.928	314.103	Invalid mass	No results	No results	14.7816	3.88573	4.92647e-10	1	1.22114	up
Com_10584_pos	4-(5-propyl-2-pyridyl)benzonitrile	C15 H14 N2	244.095	6.11	245.102	Invalid mass	No results	No results	2.57551	1.36486	5.66583e-10	1	1.21665	up
Com_4711_pos	N-(9-oxodecyl)acetamide	C12 H23 N O2	213.173	14.289	214.18	Full match	No results	No results	0.0956871	-3.38553	6.08678e-10	1	1.21324	down
Com_10843_pos	TNH	C14 H22 N6 O6	370.161	7.445	371.168	Full match	No results	No results	3.1448	1.65297	6.50384e-10	1	1.21115	up
Com_2620_pos	Phosphocholine	C5 H14 N O4 P	183.066	14.634	184.074	No results	Full match	No results	0.305648	-1.71006	6.53324e-10	1	1.21106	down
Com_4695_pos	Cyasterone	C29 H44 O8	520.304	11.687	521.311	No results	Full match	Full match	0.323012	-1.63034	7.4652e-10	1	1.21271	down
Com_4349_pos	4-oxododecanedioic acid	C12 H20 O5	226.121	8.924	227.128	Invalid mass	No results	No results	2.3299	1.22027	8.33163e-10	1	1.20967	up
Com_2374_pos	4-fluoro-N-[4-(4-methylpiperazino)phenyl]benzenesulfonamide	C17 H20 F N3 O2 S	349.128	10.276	350.135	Invalid mass	No results	No results	0.611282	-0.710089	9.23455e-10	1	1.2166	down
Com_11903_pos	Prim-O-glucosylcimifugin	C22 H28 O11	468.161	8.194	469.169	No results	No results	Full match	0.459119	-1.12306	9.81001e-10	1	1.21364	down
Com_10061_pos	(2,6-dimethylmorpholino)(1-methyl-5-nitro-1H-pyrazol-4-yl)methanone	C11 H16 N4 O4	290.095	8.174	291.102	Invalid mass	No results	No results	0.48421	-1.0463	9.99021e-10	1	1.21112	down
Com_488_pos	MAG (18:3)	C21 H36 O4	352.262	14.352	353.269	No results	No results	Full match	0.392181	-1.35041	1.04778e-09	1	1.21199	down
Com_5350_pos	Harpagide	C15 H24 O10	364.138	9.318	365.146	No results	No results	Full match	2.82474	1.49812	1.10214e-09	1	1.21662	up
Com_4676_pos	D-Erythronolactone	C4 H6 O4	118.027	3.995	119.034	No results	No results	Full match	1.85136	0.888583	1.10218e-09	1	1.20901	up
Com_264_pos	(5Z)-3-aminonon-5-enoic acid	C9 H17 N O2	171.126	13.972	172.134	Full match	No results	No results	0.134988	-2.88909	1.28328e-09	1	1.20891	down
Com_21478_pos	Rauwolscine hydrochloride	C21 H27 Cl N2 O3	390.169	7.572	391.177	No results	No results	Full match	18.4429	4.20499	1.30461e-09	1	1.20942	up
Com_8409_pos	2-Arachidonoyl glycerol	C23 H38 O4	378.275	15.361	379.282	Invalid mass	No results	No results	0.636248	-0.652339	1.32627e-09	1	1.21062	down
Com_10255_pos	10-methoxy-4H-benzo[4,5]cyclohepta[b]thiophen-4-one	C14 H10 O2 S	220.059	7.488	221.066	Invalid mass	No results	No results	3.48765	1.80226	1.3451e-09	1	1.216	up
Com_17139_pos	Rhein	C15 H8 O6	284.033	10.238	285.04	No results	No results	Full match	8.89285	3.15265	1.61906e-09	1	1.20953	up
Com_3972_pos	6-Hexanoyl-D-erythro-sphingosine	C24 H47 N O3	397.356	15.189	398.363	Full match	No results	No results	0.0523394	-4.25596	1.62106e-09	1	1.21608	down
Com_1248_pos	6,7-Dimethoxy-4-Methylcoumarin	C12 H12 O4	220.074	2.156	221.081	No results	No results	Full match	0.526196	-0.926328	1.72436e-09	1	1.21302	down
Com_18441_pos	N1-(3,4-dimethoxyphenethyl)-4-methylbenzene-1-sulfonamide	C17 H21 N O4 S	335.122	6.176	336.13	Invalid mass	No results	No results	4.87375	2.28503	1.90242e-09	1	1.21401	up
Com_1531_pos	10-Deacetylasperulosidic acid	C16 H22 O11	390.117	8.026	391.124	No results	No results	Full match	0.416147	-1.26484	2.05356e-09	1	1.21509	down
Com_360_pos	2-Hydroxycinnamic acid	C9 H8 O3	146.037	10.274	147.044	Invalid mass	No match	No match	0.37467	-1.41631	2.23272e-09	1	1.21678	down
Com_12447_pos	Docosatrienoic acid	C22 H38 O2	334.285	14.621	335.292	Invalid mass	No results	No results	0.456443	-1.13149	2.41011e-09	1	1.2079	down
Com_7482_pos	LPC 15:0	C23 H48 N O7 P	481.317	14.717	482.324	No results	Full match	Full match	0.152653	-2.71167	2.73697e-09	1	1.20641	down
Com_4626_pos	4-hydroxy-1-methyl-3-(phenylthio)-1,2-dihydroquinolin-2-one	C16 H13 N O2 S	283.067	5.937	284.075	Full match	No results	No results	5.34969	2.41946	2.88832e-09	1	1.21448	up
Com_7158_pos	Robinin	C33 H40 O19	351.13	7.39	741.222	Invalid mass	No results	No results	3.76145	1.91129	3.05312e-09	1	1.21518	up
Com_3199_pos	3',4'-Dihydroxyphenylacetone	C9 H10 O3	166.063	5.983	167.071	Full match	No results	Full match	2.91229	1.54216	3.21821e-09	1	1.21376	up
Com_4122_pos	Gomisin G	C30 H32 O9	536.206	9.086	537.213	No results	No results	Full match	0.281158	-1.83055	3.23577e-09	1	1.20614	down
Com_15446_pos	(+)-Catechin	C15 H14 O6	290.079	8.009	291.087	No results	No results	Full match	0.487995	-1.03506	3.42033e-09	1	1.20744	down
Com_91_pos	Stearamide	C18 H37 N O	283.288	15.657	284.295	Full match	No results	No results	0.093545	-3.41819	3.54852e-09	1	1.20686	down
Com_1064_pos	Kojic acid	C6 H6 O4	142.027	4.116	143.034	Full match	No results	Full match	14.0042	3.80779	3.64329e-09	1	1.22017	up
Com_18126_pos	5-(4-benzylpiperazino)-2,4(1H,3H)-pyrimidinedione	C15 H18 N4 O2	286.14	10.687	287.147	Invalid mass	No results	No results	6.81332	2.76836	3.7911e-09	1	1.20619	up
Com_2256_pos	N-Acetylsphingosine	C20 H39 N O3	363.275	14.297	364.282	Invalid mass	No results	No results	0.106141	-3.23594	4.26137e-09	1	1.20683	down
Com_1003_pos	(S)-Glutamic acid	C5 H9 N O4	147.053	1.348	148.061	No results	No results	Full match	2.11908	1.08344	5.18645e-09	1	1.20975	up
Com_1964_pos	Polypodine B	C27 H44 O8	496.304	14.345	497.311	No results	No results	Full match	0.349344	-1.51728	5.25377e-09	1	1.21672	down
Com_13265_pos	Coniferin	C16 H22 O8	364.114	7.702	365.121	Invalid mass	No results	No results	5.55806	2.47458	5.27216e-09	1	1.21407	up
Com_1143_pos	Epigallocatechin	C15 H14 O7	306.076	2.2	307.083	No results	Invalid mass	No results	2.38484	1.25389	5.54305e-09	1	1.20633	up
Com_61_pos	Glabrolide	C30 H44 O4	468.324	11.691	469.332	No results	Full match	No results	0.13979	-2.83867	5.67059e-09	1	1.21027	down
Com_3217_pos	Linoleoyl ethanolamide	C20 H37 N O2	323.283	14.85	324.29	Full match	No results	No results	0.239902	-2.05948	5.93708e-09	1	1.21608	down
Com_15245_pos	5,7-dihydroxy-3,8-dimethoxy-2-phenyl-4H-chromen-4-one	C17 H14 O6	314.08	11.029	315.087	Full match	No results	Full match	3.1599	1.65988	5.99388e-09	1	1.21055	up
Com_7620_pos	3-Butylidenephthalide	C12 H12 O2	188.084	10.78	189.091	No results	No results	Full match	2.88426	1.5282	6.27084e-09	1	1.20554	up
Com_993_pos	L-Glutathione oxidized	C20 H32 N6 O12 S2	612.152	2.21	613.16	Full match	Full match	Full match	2.07871	1.05569	6.6583e-09	1	1.20519	up
Com_356_pos	T-2 Triol	C20 H30 O7	364.189	11.407	365.196	Invalid mass	No results	No match	0.484541	-1.04531	7.02169e-09	1	1.20305	down
Com_16787_pos	4-(methylthio)-6-phenyl-2-(3-pyridyl)pyrimidine-5-carbonitrile	C17 H12 N4 S	304.077	2.823	305.085	Full match	No results	No results	3.9816	1.99335	7.18286e-09	1	1.20953	up
Com_2697_pos	4-(2,3-dihydro-1H-indol-1-yl)-1-phenyl-1H-pyrazolo[3,4-d]pyrimidine	C19 H15 N5	313.132	8.757	314.139	Full match	No results	No match	4.17908	2.06318	7.4561e-09	1	1.21282	up
Com_11742_pos	Folinic acid	C20 H23 N7 O7	473.168	6.597	474.175	Full match	No results	Full match	64.2119	6.00477	7.67624e-09	1	1.20292	up
Com_10591_pos	2-imino-5-[4-(trifluoromethoxy)benzyl]-1,3-thiazolan-4-one	C11 H9 F3 N2 O2 S	327.989	2.547	328.996	Invalid mass	No results	No results	0.511498	-0.967199	8.84785e-09	1	1.20233	down
Com_51_pos	octadec-9-ynoic acid	C18 H32 O2	262.23	13.962	263.237	Invalid mass	No results	No results	0.211891	-2.23861	9.87403e-09	1	1.21023	down
Com_15971_pos	Polygalaxanthon VIII	C25 H28 O15	568.142	5.889	569.149	No results	No results	Full match	3.27625	1.71205	1.00443e-08	1	1.20505	up
Com_900_pos	Kaempferol	C15 H10 O6	286.048	9.464	287.055	Full match	Full match	Full match	0.640112	-0.643603	1.03642e-08	1	1.20582	down
Com_5389_pos	Avicularin	C20 H18 O11	434.086	9.046	435.093	Full match	No results	Full match	0.584719	-0.774185	1.2365e-08	1	1.212	down
Com_8580_pos	Succinic anhydride	C4 H4 O3	100.016	2.762	101.024	No results	No results	Full match	2.74815	1.45846	1.27129e-08	1	1.21486	up
Com_3363_pos	2-morpholinophenyl 1-methyl-1H-imidazole-4-sulfonate	C14 H17 N3 O4 S	323.099	8.121	324.106	Invalid mass	No results	No results	2.36028	1.23896	1.33028e-08	1	1.20678	up
Com_3399_pos	Methyl dihydrojasmonate	C13 H22 O3	226.157	12.2	227.164	Full match	No results	Full match	2.06204	1.04407	1.38452e-08	1	1.20677	up
Com_2303_pos	L-aspartic Acid	C4 H7 N O4	133.038	1.332	134.045	No results	No results	Full match	7.59823	2.92566	1.41505e-08	1	1.21665	up
Com_13557_pos	Aloesin	C19 H22 O9	376.12	11.444	377.127	Invalid mass	No results	No results	4.34315	2.11874	1.50357e-08	1	1.21654	up
Com_258_pos	PC (16:2e/2:0)	C26 H50 N O7 P	519.333	14.632	520.34	No results	Full match	Full match	0.272255	-1.87697	1.65523e-08	1	1.21114	down
Com_7270_pos	Eicosapentaenoic acid ethyl ester	C22 H34 O2	347.281	14.337	348.288	Invalid mass	No results	No results	0.34163	-1.54949	1.79188e-08	1	1.20726	down
Com_9670_pos	O6-CM-dG	C12 H15 N5 O6	325.103	9.699	326.111	Full match	No results	No results	3.25839	1.70416	2.17376e-08	1	1.20658	up
Com_4969_pos	8-Aminooctanoic acid	C8 H17 N O2	159.126	13.905	160.133	No results	No results	Full match	0.214909	-2.2182	2.30786e-08	1	1.20396	down
Com_1946_pos	TriacetonaMine	C9 H17 N O	155.131	15.265	156.139	No results	No results	Full match	0.38918	-1.36149	2.68156e-08	1	1.20574	down
Com_4298_pos	Nicotianamine	C12 H21 N3 O6	303.143	1.33	304.151	No results	No results	Full match	4.81371	2.26715	2.89539e-08	1	1.21466	up
Com_2213_pos	Lithosprmoside	C14 H19 N O8	329.112	1.954	330.119	No results	Full match	Full match	0.645355	-0.631836	2.96307e-08	1	1.19662	down
Com_924_pos	LPC 18:3	C26 H48 N O7 P	517.318	14.326	518.325	No results	Full match	Full match	0.367007	-1.44612	3.04258e-08	1	1.20897	down
Com_14863_pos	Linustatin	C16 H27 N O11	444.199	11.336	445.206	Invalid mass	No results	No results	2.46115	1.29933	3.22999e-08	1	1.19918	up
Com_15_pos	Poricoic acid A	C31 H46 O5	498.334	12.421	499.342	No results	No results	Full match	2.38447	1.25367	3.73619e-08	1	1.19772	up
Com_18107_pos	3-(4-ethoxyphenyl)-2-(tetrahydro-1H-pyrrol-1-ylcarbonyl)acrylonitrile	C16 H18 N2 O2	270.133	2.489	271.14	Invalid mass	No results	No results	2.54612	1.3483	3.79684e-08	1	1.19594	up
Com_1389_pos	4-Methoxycinnamic acid	C10 H10 O3	160.053	2.156	161.06	Invalid mass	No results	No match	0.531841	-0.910932	3.80154e-08	1	1.20748	down
Com_12485_pos	Maslinic acid	C30 H48 O4	494.338	13.638	495.345	Invalid mass	No results	No results	2.09013	1.0636	3.81276e-08	1	1.20015	up
Com_1265_pos	1,N6-Etheno-2-Deoxy-Adenosine	C12 H13 N5 O3	275.101	7.096	276.108	No results	No results	Full match	4.80247	2.26378	3.88068e-08	1	1.21719	up
Com_6022_pos	8-(1,2-dihydroxy-3-methylbut-3-en-1-yl)-7-methoxy-2H-chromen-2-one	C15 H16 O5	298.084	10.785	299.092	Invalid mass	No results	No match	0.339629	-1.55797	4.00302e-08	1	1.21438	down
Com_5156_pos	2-oxo-2H-chromene-3-carboxylic acid	C10 H6 O4	190.027	8.69	191.034	Full match	No results	Full match	1.63384	0.708265	4.12208e-08	1	1.19774	up
Com_3961_pos	10-Nitrolinoleate	C18 H31 N O4	307.213	13.32	308.22	Invalid mass	No results	No results	0.146501	-2.77101	4.21116e-08	1	1.20298	down
Com_2115_pos	Tropine	C8 H15 N O	141.116	15.265	142.123	No results	No results	Full match	0.403275	-1.31016	4.39485e-08	1	1.19502	down
Com_1433_pos	Xanthurenic acid O-hexoside	C16 H17 N O9	367.091	15.568	368.098	No results	No results	Full match	3.74429	1.90469	4.45756e-08	1	1.20507	up
Com_19383_pos	Bialaphos	C11 H22 N3 O6 P	345.107	4.109	346.114	Invalid mass	No results	No results	2.63577	1.39822	4.59651e-08	1	1.19771	up
Com_2297_pos	Zeatin-7-N-glucoside	C16 H23 N5 O6	381.164	6.786	382.171	Full match	No results	Full match	2.48546	1.31351	4.7814e-08	1	1.21413	up
Com_1669_pos	Dl-3-Hydroxynorvaline	C5 H11 N O3	133.074	1.471	134.082	No results	No results	Full match	1.5812	0.661023	4.92506e-08	1	1.20554	up
Com_10321_pos	4-(4-methoxyphenyl)-6-pyridin-4-yl-1,3,5-triazin-2(3H)-one	C15 H12 N4 O2	280.093	7.707	281.1	Invalid mass	No results	No match	0.623321	-0.681953	5.42126e-08	1	1.19334	down
Com_4980_pos	1,2,3,7-Tetramethoxyxanthone	C17 H16 O6	316.095	10.784	317.102	No results	No results	Full match	0.347683	-1.52416	5.48514e-08	1	1.21486	down
Com_3447_pos	4-(tert-butyl)phenyl 3,5-dimethylisoxazole-4-carboxylate	C16 H19 N O3	273.133	1.136	274.14	Invalid mass	No results	No results	3.94489	1.97999	5.55158e-08	1	1.19644	up
Com_11031_pos	5,6-dimethoxy-2-(2-methoxyphenyl)-4H-chromen-4-one	C18 H16 O5	136.054	8.27	295.097	Invalid mass	No results	No results	0.391785	-1.35187	5.94397e-08	1	1.20843	down
Com_19805_pos	PC (19:2/18:5)	C45 H76 N O8 P	789.517	15.49	790.523	No results	Invalid mass	No results	0.127346	-2.97318	6.68092e-08	1	1.19764	down
Com_8574_pos	Biotin	C10 H16 N2 O3 S	244.085	9.238	245.093	Invalid mass	No results	No results	2.02341	1.01679	6.86117e-08	1	1.19261	up
Com_9771_pos	4-Methylumbelliferyl phenylphosphonate	C16 H13 O5 P	316.05	1.153	317.057	No results	No results	Full match	0.413806	-1.27297	6.87852e-08	1	1.19749	down
Com_13145_pos	3-hydroxy-3,4-bis[(4-hydroxy-3-methoxyphenyl)methyl]oxolan-2-one	C20 H22 O7	391.166	7.572	392.173	Invalid mass	No results	No results	10.7176	3.42192	6.90532e-08	1	1.21151	up
Com_434_pos	Heroin-d3	C21 H20 [2]H3 N O5	372.176	8.738	373.184	Full match	No results	No results	2.16384	1.11359	6.93331e-08	1	1.19337	up
Com_8782_pos	N-{[(2R,4S,5R)-5-Ethyl-1-azabicyclo[2.2.2]oct-2-yl]methyl}-2-furamide	C15 H22 N2 O2	244.154	2.486	245.161	Invalid mass	No results	No results	3.11432	1.63892	8.02671e-08	1	1.19504	up
Com_2376_pos	Tuberonic acid hexoside	C18 H28 O9	388.174	8.972	389.18	No results	No results	Full match	1.72298	0.784907	8.44427e-08	1	1.19733	up
Com_15149_pos	18-Nor-4,15-dihydroxyabieta-8,11,13-trien-7-one	C19 H26 O3	302.189	10.952	303.196	No results	No results	Full match	0.371814	-1.42735	8.65706e-08	1	1.19393	down
Com_11549_pos	JWH 018 N-(5-chloropentyl) analog	C24 H22 Cl N O	375.143	7.031	376.151	Invalid mass	No results	No results	6.28231	2.6513	8.85899e-08	1	1.21227	up
Com_15846_pos	IBA	C12 H13 N O2	203.095	7.471	204.102	No results	No results	Full match	22.5347	4.49408	8.92359e-08	1	1.2186	up
Com_8122_pos	Albendazole-2-aminosulfone	C10 H13 N3 O2 S	217.095	8.81	218.103	Invalid mass	No results	No results	3.43754	1.78138	9.18496e-08	1	1.21444	up
Com_1333_pos	Diosgenin	C27 H42 O3	396.303	13.577	397.311	Invalid mass	No results	No results	1.61187	0.688732	9.37244e-08	1	1.19131	up
Com_2644_pos	1-[4-hydroxy-3-(3-methylbut-2-en-1-yl)phenyl]ethan-1-one	C13 H16 O2	204.115	10.476	205.123	Full match	No results	No results	1.64421	0.717395	9.75027e-08	1	1.19541	up
Com_1501_pos	Ala-gly	C5 H10 N2 O3	146.069	1.334	147.077	No results	No results	Full match	2.68528	1.42507	1.01171e-07	1	1.20409	up
Com_4723_pos	Oleoyl ethylamide	C20 H39 N O	1237.21	15.778	619.614	Invalid mass	No results	No results	0.0571788	-4.12838	1.19213e-07	1	1.19916	down
Com_348_pos	Protocatechuic acid	C7 H6 O4	154.027	2.153	155.034	No results	No results	Full match	0.603121	-0.729481	1.2833e-07	1	1.1965	down
Com_12685_pos	Orlistat	C29 H53 N O5	533.349	14.816	534.356	Invalid mass	No match	No results	0.318942	-1.64863	1.28737e-07	1	1.19678	down
Com_15194_pos	N-[3-(1H-imidazol-1-yl)propyl]-5-methoxy-1H-indole-2-carboxamide	C16 H18 N4 O2	320.124	6.54	321.131	Invalid mass	No results	No results	2.30117	1.20237	1.30157e-07	1	1.19311	up
Com_3569_pos	Deoxycorticosterone 21-glucoside	C27 H40 O8	492.273	11.711	493.281	Full match	No results	No results	3.65353	1.86929	1.352e-07	1	1.21389	up
Com_5450_pos	PC (14:1e/3:0)	C25 H50 N O7 P	485.351	14.683	486.357	No results	Invalid mass	No results	0.258306	-1.95285	1.43553e-07	1	1.20763	down
Com_10376_pos	Maltotetraose	C24 H42 O21	688.205	1.488	689.211	Invalid mass	No results	No results	2.17109	1.11842	1.49059e-07	1	1.19237	up
Com_19253_pos	Sinoacutine	C19 H21 N O4	327.147	10.69	328.155	No results	No results	Full match	7.22051	2.8521	1.51354e-07	1	1.2025	up
Com_4486_pos	bicyclo[2.2.2]oct-2-en-1-yl 4-methylbenzene-1-sulfonate	C15 H18 O3 S	278.101	5.826	279.108	Invalid mass	No results	No results	14.3658	3.84456	1.56793e-07	1	1.21538	up
Com_888_pos	Guanine	C5 H5 N5 O	151.05	3.617	152.057	Full match	Full match	Full match	1.68706	0.754509	1.60289e-07	1	1.2128	up
Com_5224_pos	4-Hydroxy-6-methylquinoline-3-carboxylic acid	C11 H9 N O3	203.059	13.312	204.066	No results	No results	Full match	1.801	0.848795	1.69558e-07	1	1.18605	up
Com_11311_pos	4-methoxyphenyl 3,5-dimethyl-1-phenyl-1H-pyrazole-4-carboxylate	C19 H18 N2 O3	344.109	6.049	345.117	Invalid mass	No results	No results	1.79447	0.843562	1.77453e-07	1	1.19026	up
Com_19398_pos	2-cyano-3-(3,4-dimethoxyphenyl)acrylic acid	C12 H11 N O4	233.069	5.869	234.077	Full match	No results	No results	2.95308	1.56222	1.8941e-07	1	1.20517	up
Com_4247_pos	Pinoresinol Diglucoside	C32 H42 O16	682.246	7.566	683.253	No results	No results	Full match	124.51	6.96012	1.94389e-07	1	1.21764	up
Com_1671_pos	lupinine	C10 H19 N O	169.147	15.259	170.154	No results	No results	Full match	0.396609	-1.33421	2.02939e-07	1	1.19241	down
Com_10752_pos	7-(3,4-dihydroxyphenyl)-5-hydroxy-1-(4-hydroxyphenyl)heptan-3-one	C19 H22 O5	352.131	8.234	353.139	Invalid mass	No results	No results	0.491676	-1.02422	2.04184e-07	1	1.19106	down
Com_2675_pos	Bruceine D	C20 H26 O9	410.156	8.967	411.163	No results	No results	Full match	1.83351	0.874612	2.173e-07	1	1.19164	up
Com_18493_pos	Complanatuside	C28 H32 O16	624.17	8.421	625.177	No results	No results	Full match	4.18021	2.06358	2.23983e-07	1	1.20611	up
Com_1_pos	Betaine	C5 H11 N O2	117.079	1.371	118.086	Full match	Full match	Full match	1.74836	0.806006	2.28248e-07	1	1.20646	up
Com_7007_pos	L-Asparagine	C4 H8 N2 O3	132.054	1.326	133.061	No results	No results	Full match	2.83278	1.50222	2.28702e-07	1	1.1926	up
Com_11105_pos	methyl 2-(6-hydroxy-3-oxo-3H-xanthen-9-yl)benzoate	C21 H14 O5	346.09	6.628	347.098	Invalid mass	No results	No results	3.06537	1.61606	2.42176e-07	1	1.19299	up
Com_2501_pos	Thromboxane B2	C20 H34 O6	762.454	14.924	763.461	Invalid mass	No results	No results	0.253522	-1.97982	2.42575e-07	1	1.21014	down
Com_5105_pos	Kanosamine	C6 H13 N O5	179.081	6.479	180.088	Invalid mass	No results	No results	0.597335	-0.743388	2.42729e-07	1	1.18873	down
Com_17209_pos	Riboflavin-5'-monophosphate	C17 H21 N4 O9 P	456.107	10.635	457.114	No results	No results	Full match	0.590178	-0.760779	2.62889e-07	1	1.19439	down
Com_10004_pos	1-(3-ethyl-2,4-dihydroxy-6-methoxyphenyl)butan-1-one	C13 H18 O4	220.108	11.606	221.115	Invalid mass	No results	No results	6.00332	2.58576	2.66976e-07	1	1.21138	up
Com_7672_pos	Nobiletin	C21 H22 O8	402.132	7.887	403.139	No results	No results	Full match	2.89522	1.53367	2.73247e-07	1	1.20367	up
Com_2393_pos	Araloside A	C47 H74 O18	943.516	12.981	944.522	No results	Invalid mass	No results	0.168526	-2.56895	2.82664e-07	1	1.18303	down
Com_10733_pos	2-Arachidonyl Glycerol ether	C23 H40 O3	364.296	15.592	365.303	Invalid mass	No results	No results	0.277207	-1.85097	2.83033e-07	1	1.18866	down
Com_14022_pos	LLK	C18 H36 N4 O4	372.274	8.044	373.282	Full match	No results	No results	0.435349	-1.19976	2.8637e-07	1	1.20429	down
Com_18504_pos	Tricin 4'-O-(beta-guaiacylglyceryl) ether	C27 H26 O11	526.147	10.594	527.154	No results	No results	Full match	0.410399	-1.2849	2.9077e-07	1	1.20479	down
Com_4458_pos	8-Hydroxy-2-Deoxyguanosine	C10 H13 N5 O5	283.091	1.701	284.098	No results	No results	Full match	0.484178	-1.04639	3.1603e-07	1	1.18422	down
Com_11445_pos	5-(2,5-dihydroxyhexyl)oxolan-2-one	C10 H18 O4	224.105	9.748	225.113	Invalid mass	No results	No match	2.83855	1.50515	3.2026e-07	1	1.18096	up
Com_8881_pos	13,14-dihydro-15-keto-tetranor Prostaglandin E2	C16 H26 O5	280.168	11.083	281.175	Invalid mass	No results	No results	2.39328	1.25899	3.36013e-07	1	1.20469	up
Com_1752_pos	N-Feruloyl putrescine	C14 H20 N2 O3	264.148	6.848	265.155	No results	No results	Full match	0.664318	-0.590054	3.42368e-07	1	1.20855	down
Com_13553_pos	Oroxylin A	C16 H12 O5	284.069	10.747	285.076	No results	No results	Full match	0.515911	-0.954807	3.43393e-07	1	1.20342	down
Com_6086_pos	p-Aminocinnamic acid	C9 H9 N O2	163.063	1.524	164.071	No results	No results	Full match	6.98231	2.8037	3.5963e-07	1	1.21426	up
Com_5458_pos	1-(2-furyl)pentane-1,4-dione	C9 H10 O3	188.048	13.216	189.055	Invalid mass	No results	No match	0.334629	-1.57937	3.69731e-07	1	1.19518	down
Com_10780_pos	(5S)-5-hydroxy-1,7-diphenylheptan-3-one	C19 H22 O2	304.143	7.061	305.15	Invalid mass	No results	No match	0.472179	-1.08259	3.73541e-07	1	1.18684	down
Com_11037_pos	Biocytin	C16 H28 N4 O4 S	372.177	10.634	373.184	Invalid mass	No results	No results	1.94328	0.958494	3.77341e-07	1	1.18416	up
Com_13134_pos	4,7,8-trimethoxyfuro[2,3-b]quinoline	C14 H13 N O4	259.085	8.677	260.092	Full match	No results	No results	18.3241	4.19567	3.81031e-07	1	1.21476	up
Com_6544_pos	Ganoderic acid A	C30 H44 O7	516.31	11.688	517.317	No results	No results	Full match	0.373047	-1.42257	3.84206e-07	1	1.19552	down
Com_5665_pos	(12Z)-9,10,11-trihydroxyoctadec-12-enoic acid	C18 H34 O5	352.223	12.311	353.23	Invalid mass	No results	No results	2.74847	1.45863	4.14849e-07	1	1.19159	up
Com_19997_pos	Polygalic acid	C29 H44 O6	488.316	11.931	489.323	No results	No results	Full match	0.179761	-2.47585	4.4092e-07	1	1.17834	down
Com_938_pos	Bryodulcosigenin	C30 H50 O4	496.356	12.32	497.363	No results	Invalid mass	No results	0.426732	-1.2286	4.75974e-07	1	1.21024	down
Com_5827_pos	4-hydroxy-3-(3-methylbut-2-en-1-yl)benzoic acid	C12 H14 O3	206.095	10.771	207.102	Full match	Full match	Full match	1.86485	0.899063	5.15232e-07	1	1.19374	up
Com_2243_pos	Glycyrrhizin	C42 H62 O16	822.405	11.582	823.411	No results	No results	Full match	0.0863071	-3.53438	5.20697e-07	1	1.21212	down
Com_6286_pos	Nebularine	C10 H12 N4 O4	252.085	2.188	253.092	No results	No results	Full match	1.62678	0.702016	5.36671e-07	1	1.17751	up
Com_9299_pos	2-Anisic acid	C8 H8 O3	174.032	3.85	175.039	Invalid mass	No results	No match	0.568249	-0.815404	5.46779e-07	1	1.21266	down
Com_5465_pos	Przewaquinone A	C19 H18 O4	310.12	10.428	311.128	No results	No results	Full match	0.572143	-0.805552	5.49835e-07	1	1.17669	down
Com_17330_pos	Synephrine	C9 H13 N O2	167.095	4.109	168.102	No results	No results	Full match	3.2727	1.71048	5.55987e-07	1	1.21224	up
Com_6659_pos	PC (14:0e/3:0)	C25 H52 N O7 P	509.349	15.029	510.356	No results	Full match	Full match	0.272606	-1.87511	5.84043e-07	1	1.1857	down
Com_7147_pos	N epsilon,N epsilon,N epsilon-trimethyllysine	C9 H20 N2 O2	188.153	1.264	189.16	No results	No results	Full match	2.14978	1.10419	5.94693e-07	1	1.20455	up
Com_3717_pos	Dehydropachymic Acid	C33 H50 O5	526.367	14.761	527.374	No results	No results	Full match	0.301706	-1.72879	6.0269e-07	1	1.17835	down
Com_20025_pos	Galangin	C15 H10 O5	270.057	8.178	271.064	Invalid mass	No results	No results	1.91743	0.939173	6.05715e-07	1	1.20262	up
Com_8_pos	Hexadecanamide	C16 H33 N O	255.256	15.119	256.264	Full match	No results	No results	0.347512	-1.52487	6.50403e-07	1	1.18585	down
Com_11809_pos	Roburic acid	C30 H48 O2	440.367	14.707	441.373	No results	No results	Full match	0.0511468	-4.28921	6.63811e-07	1	1.18606	down
Com_21225_pos	N-[1-methyl-1-oxo-1-(2-thienyl)-lambda~6~-sulfanylidene]-N'-phenylurea	C12 H12 N2 O2 S2	317.986	2.542	318.993	Invalid mass	No results	No results	0.426557	-1.22919	6.94685e-07	1	1.17533	down
Com_16909_pos	3-hydroxy-2-octylpentanedioic acid	C13 H24 O5	242.152	14.644	243.16	Invalid mass	No results	No results	0.275412	-1.86034	7.07979e-07	1	1.18979	down
Com_4961_pos	Triptolide	C20 H24 O6	360.158	8.446	361.165	No results	No results	Full match	0.449474	-1.15369	7.35607e-07	1	1.17347	down
Com_11515_pos	Pyrroloquinoline quinone	C14 H6 N2 O8	330.011	1.585	331.018	No results	No results	Full match	0.295897	-1.75683	7.57851e-07	1	1.17501	down
Com_12740_pos	Estriol	C18 H24 O3	305.197	12.93	306.204	Invalid mass	No results	No results	1.93979	0.955899	7.6817e-07	1	1.17333	up
Com_7008_pos	PC (14:1e/2:0)	C24 H48 N O7 P	493.318	14.456	494.325	No results	Full match	Full match	0.238227	-2.06959	7.85888e-07	1	1.20122	down
Com_12724_pos	Anandamide (AEA)	C22 H37 N O2	347.28	15.187	348.287	Invalid mass	No results	No results	0.344744	-1.5364	8.19278e-07	1	1.17766	down
Com_8118_pos	4,4'-(Isopropylidenebis(4,1-phenyleneoxy))dianiline	C27 H26 N2 O2	410.192	8.314	411.199	Invalid mass	No results	No match	16.4665	4.04146	8.20131e-07	1	1.21123	up
Com_7659_pos	Aflatoxin G2	C17 H14 O7	330.075	10.321	331.083	Full match	No results	Full match	2.59657	1.37661	8.31072e-07	1	1.19031	up
Com_1267_pos	Dihydrojasmone	C11 H18 O	166.136	15.259	167.143	No results	No results	Full match	0.37881	-1.40045	8.72632e-07	1	1.19731	down
Com_2345_pos	Prostaglandin K2	C20 H30 O5	332.197	12.993	333.204	Invalid mass	No results	No results	3.79203	1.92297	9.17431e-07	1	1.20855	up
Com_814_pos	alpha-Ionone	C13 H20 O	192.152	10.443	193.159	No results	No results	Full match	0.542883	-0.881286	9.91483e-07	1	1.19588	down
Com_5563_pos	Neocnidilide	C12 H18 O2	194.131	13.773	195.138	No results	No results	Full match	0.36474	-1.45506	1.01983e-06	1	1.17132	down
Com_523_pos	(+)-epipinoresinol-4-O-beta-D-glucoside	C26 H32 O11	520.195	8.175	521.203	No results	No results	Full match	0.513816	-0.960676	1.04736e-06	1	1.20067	down
Com_20166_pos	TPH	C15 H23 N5 O5	335.158	7.46	336.166	Invalid mass	No results	No results	1.96311	0.973142	1.05383e-06	1	1.20017	up
Com_12696_pos	N-(cyclopropylmethyl)-N'-phenylurea	C11 H14 N2 O	228.064	12.025	229.071	Invalid mass	No results	No results	0.484745	-1.0447	1.20852e-06	1	1.17621	down
Com_12188_pos	Xanthorhamnin	C34 H42 O20	770.227	9.28	771.235	Full match	Full match	Full match	5.63449	2.49428	1.21235e-06	1	1.20762	up
Com_4090_pos	Oxymatrine	C15 H24 N2 O2	264.188	11.416	265.195	Invalid mass	No results	No results	0.530675	-0.914101	1.26202e-06	1	1.19689	down
Com_18444_pos	Carnosic acid	C20 H28 O4	332.199	11.987	333.206	No results	No results	Full match	1.99229	0.994428	1.31431e-06	1	1.16913	up
Com_988_pos	Sweroside	C16 H22 O9	358.127	7.787	359.134	No results	Full match	Full match	0.519623	-0.944462	1.36787e-06	1	1.1955	down
Com_15022_pos	5-[(E)-2-(3,5-dihydroxyphenyl)ethenyl]-2-methoxybenzene-1,3-diol	C15 H14 O5	274.085	5.888	275.092	Full match	No results	Full match	2.82315	1.4973	1.37541e-06	1	1.20764	up
Com_12409_pos	L-Saccharopine	C11 H20 N2 O6	276.132	1.33	277.14	No results	No results	Full match	1.94876	0.962553	1.4131e-06	1	1.17127	up
Com_8488_pos	Miltirone	C19 H22 O2	282.162	12.417	283.169	No results	No results	Full match	1.98711	0.99067	1.42087e-06	1	1.16682	up
Com_10138_pos	Tyramine	C8 H11 N O	137.084	2.605	138.091	No results	No results	Full match	2.47095	1.30506	1.48908e-06	1	1.20195	up
Com_1483_pos	3-(5-phenyl-1,3-oxazol-2-yl)-4-(trifluoromethyl)pyridine	C15 H9 F3 N2 O	290.062	1.456	291.069	Invalid mass	No results	No results	1.86446	0.898756	1.49438e-06	1	1.1991	up
Com_13969_pos	PC (9:0/9:0)	C26 H52 N O8 P	537.345	13.682	538.353	No results	Full match	No results	0.161311	-2.63209	1.52934e-06	1	1.20814	down
Com_12786_pos	Bufalin	C24 H34 O4	386.246	11.989	387.253	No results	Full match	Full match	1.58085	0.660697	1.60499e-06	1	1.18971	up
Com_1076_pos	Acetyl-trans-resveratrol	C20 H18 O6	354.111	8.839	355.118	No results	No results	Full match	0.42158	-1.24612	1.60588e-06	1	1.16998	down
Com_6670_pos	DNH	C14 H20 N6 O7	384.14	7.113	385.148	Full match	No results	No results	2.3518	1.23377	1.65585e-06	1	1.20818	up
Com_26_pos	Arachidonoyl amide	C20 H33 N O	303.254	15.248	304.261	Invalid mass	No results	No results	0.634552	-0.656189	1.74602e-06	1	1.19174	down
Com_3525_pos	Angiotensin IV	C40 H54 N8 O8	774.417	13.781	775.425	Invalid mass	No results	No results	3.40855	1.76916	1.81809e-06	1	1.16391	up
Com_9087_pos	6-chloro-5-fluoro-1H-benzo[d]imidazole	C7 H4 Cl F N2	170.004	4.099	171.011	Full match	No results	No results	0.648836	-0.624073	1.84099e-06	1	1.19796	down
Com_12255_pos	Omeprazole sulphone	C17 H19 N3 O4 S	361.117	7.787	362.124	Invalid mass	No results	No results	1.79135	0.841046	1.85997e-06	1	1.17702	up
Com_12479_pos	Sulforidazine	C21 H26 N2 O2 S2	402.151	10.924	403.159	Invalid mass	No results	No results	3.26404	1.70666	1.86055e-06	1	1.19782	up
Com_6349_pos	Camptothecin	C20 H16 N2 O4	370.091	10.792	371.098	Invalid mass	No results	No match	0.573929	-0.801055	1.87298e-06	1	1.19258	down
Com_2_pos	Oleamide	C18 H35 N O	281.272	15.26	282.279	Full match	No results	Full match	0.405428	-1.30248	1.89523e-06	1	1.1979	down
Com_18799_pos	4-{3-[(3,4-dihydroxyphenyl)methyl]-2-methylbutyl}benzene-1,2-diol	C18 H22 O4	324.132	3.331	325.14	Invalid mass	No results	No results	0.580633	-0.784301	2.08549e-06	1	1.17744	down
Com_2474_pos	Biopterin	C9 H11 N5 O3	237.085	1.729	238.092	Full match	No results	Full match	2.76336	1.46643	2.28768e-06	1	1.16152	up
Com_11663_pos	(4-benzoylpiperidino)[4-(tert-butyl)phenyl]methanone	C23 H27 N O2	698.409	6.991	350.212	Invalid mass	No results	No results	0.464041	-1.10768	2.32968e-06	1	1.16157	down
Com_1020_pos	Geranylacetone	C13 H22 O	194.167	15.259	195.175	No results	No results	Full match	0.383443	-1.38292	2.42652e-06	1	1.19406	down
Com_12_pos	Isoferulic acid	C10 H10 O4	194.058	10.096	195.065	Full match	Full match	Full match	0.618156	-0.693958	2.44351e-06	1	1.19804	down
Com_15812_pos	PC (22:6e/13:1)	C43 H74 N O7 P	747.506	15.506	748.514	No results	Invalid mass	No results	0.184908	-2.43512	2.46444e-06	1	1.1653	down
Com_8060_pos	Solasonine	C45 H73 N O16	883.493	12.327	884.498	No results	No results	Full match	0.393954	-1.3439	2.61407e-06	1	1.16119	down
Com_12773_pos	Isoxanthohumol	C21 H22 O5	354.147	9.344	355.155	No results	No results	Full match	2.27115	1.18342	2.71609e-06	1	1.17705	up
Com_6912_pos	Berberine	C20 H18 N O4	336.125	10.247	337.132	No results	No results	Full match	13.0561	3.70666	2.80953e-06	1	1.2104	up
Com_19728_pos	6-Acetylmorphine	C19 H21 N O4	327.148	11.339	328.155	Full match	No results	Full match	0.540485	-0.887672	3.12645e-06	1	1.15722	down
Com_9080_pos	PC (5:0/13:1)	C26 H50 N O8 P	535.329	13.714	536.336	No results	Full match	No results	0.420476	-1.24991	3.16654e-06	1	1.1604	down
Com_3814_pos	L-Cysteine-glutathione gisulfide	C13 H22 N4 O8 S2	426.088	1.459	214.052	No results	No results	Full match	2.5482	1.34948	3.26492e-06	1	1.16782	up
Com_10268_pos	2-{[(4,5-dimethoxy-2-nitrophenethyl)imino]methyl}phenol	C17 H18 N2 O5	330.129	9.745	331.136	Invalid mass	No results	No results	1.78006	0.831929	3.46412e-06	1	1.1592	up
Com_13255_pos	LPC 15:1	C23 H46 N O7 P	479.3	14.389	480.307	No results	Full match	Full match	0.289658	-1.78758	3.61369e-06	1	1.1607	down
Com_3400_pos	trans-Zeatin-riboside	C15 H21 N5 O5	351.153	9.205	352.161	No results	No results	Full match	1.94475	0.959586	3.66921e-06	1	1.19814	up
Com_24055_pos	Decursinol	C14 H14 O4	246.087	10.695	247.094	No results	Invalid mass	No results	1.95733	0.968885	3.77802e-06	1	1.15614	up
Com_16834_pos	2-[5-(2-hydroxypropyl)oxolan-2-yl]propanoic acid	C10 H18 O4	224.103	11.569	225.11	Invalid mass	No results	No results	3.36585	1.75097	3.8052e-06	1	1.1861	up
Com_3934_pos	Mevalonic acid	C6 H12 O4	148.074	1.509	149.081	No results	No results	Full match	1.84143	0.880829	3.8179e-06	1	1.20107	up
Com_1210_pos	Pipecolic acid	C6 H11 N O2	129.079	1.765	130.086	Full match	Full match	Full match	0.534728	-0.903123	3.9339e-06	1	1.20201	down
Com_21427_pos	Bisdemethoxycurcumin	C19 H16 O4	308.105	6.993	309.112	No results	No results	Full match	0.544009	-0.878296	4.01467e-06	1	1.16771	down
Com_16582_pos	Irigenin	C18 H16 O8	360.085	10.338	361.093	No results	No results	Full match	2.70116	1.43358	4.17452e-06	1	1.16134	up
Com_20494_pos	Ipriflavone	C18 H16 O3	280.11	8.444	281.118	No results	No results	Full match	0.58489	-0.773762	4.23037e-06	1	1.18165	down
Com_10726_pos	2,6-Dihydroxypurine	C5 H4 N4 O2	152.034	3.614	153.041	No results	No results	Full match	1.69094	0.757824	4.278e-06	1	1.20121	up
Com_10812_pos	Isosinensetin	C20 H20 O7	372.121	7.952	373.128	No results	No results	Full match	0.532234	-0.909867	4.34494e-06	1	1.165	down
Com_25398_pos	N'-(3,5-dichloro-4-pyridinyl)-3,5-dimethyl-4-isoxazolecarbohydrazide	C11 H10 Cl2 N4 O2	300.022	7.724	301.029	Invalid mass	No results	No results	1.9133	0.93606	4.45804e-06	1	1.18176	up
Com_10202_pos	6,6-dimethyl-4-piperidino-5,6-dihydro-2H-thiine-2-thione	C12 H19 N S2	241.095	2.696	242.103	Full match	No results	No results	0.575186	-0.797901	4.67724e-06	1	1.17772	down
Com_1230_pos	MGMG (18:2)	C27 H48 O9	516.331	14.64	517.336	No results	No results	Full match	0.661552	-0.596074	4.89953e-06	1	1.16724	down
Com_582_pos	Citral	C10 H16 O	152.12	8.737	153.128	Full match	Full match	Full match	2.03562	1.02547	5.18679e-06	1	1.20501	up
Com_3973_pos	Oleoyl ethanolamide	C20 H39 N O2	325.298	15.193	326.306	Full match	No results	No results	0.227386	-2.13679	5.24637e-06	1	1.19717	down
Com_8472_pos	6''-o-acetylgenistin	C23 H22 O11	474.117	10.633	475.125	No results	No results	Full match	0.630529	-0.665365	5.35273e-06	1	1.17653	down
Com_641_pos	4-Methylumbelliferyl glucuronide	C16 H16 O9	352.08	10.562	353.087	Full match	No results	Full match	0.646468	-0.629349	5.53985e-06	1	1.19896	down
Com_12818_pos	N'-[6-(tert-butyl)thieno[3,2-d]pyrimidin-4-yl]-4-methylbenzohydrazide	C18 H20 N4 O S	322.121	7.395	323.128	Invalid mass	No results	No match	0.450136	-1.15157	5.59518e-06	1	1.17303	down
Com_17531_pos	(4-chlorophenyl)-N-[4-(4-methylpiperazino)benzyl]methanesulfonamide	C19 H24 Cl N3 O2 S	188.049	6.44	394.131	Invalid mass	No results	No results	1.53769	0.62076	5.67917e-06	1	1.15537	up
Com_9259_pos	Dracorhodin	C17 H14 O3	266.095	10.56	267.102	No results	No results	Full match	0.620811	-0.687775	5.90656e-06	1	1.1686	down
Com_6497_pos	LPE 18:1	C23 H46 N O7 P	479.301	14.915	480.309	No results	Full match	Full match	0.484185	-1.04637	6.01635e-06	1	1.15068	down
Com_4231_pos	Cytosine	C4 H5 N3 O	111.043	1.512	112.051	No results	No results	Full match	1.72894	0.789886	6.08503e-06	1	1.14841	up
Com_9195_pos	Vitamin D2	C28 H44 O	396.341	12.834	397.348	No results	No results	Full match	0.175436	-2.51098	6.2393e-06	1	1.19525	down
Com_25017_pos	N-(2,5-dichlorophenyl)-N'-(6-morpholino-3-pyridyl)thiourea	C16 H16 Cl2 N4 O S	382.036	5.965	383.043	Invalid mass	No results	No results	1.52963	0.613184	6.32295e-06	1	1.15815	up
Com_12257_pos	Plumbagin	C11 H8 O3	188.048	10.319	189.055	No results	No results	Full match	0.34107	-1.55186	7.05173e-06	1	1.1699	down
Com_3293_pos	12,13-EODE	C18 H32 O3	296.236	14.265	297.243	No results	No results	Full match	0.64647	-0.629345	7.6989e-06	1	1.16989	down
Com_23012_pos	Hecogenin	C27 H42 O4	430.306	15.843	431.314	No results	No results	Full match	0.500927	-0.997327	7.97548e-06	1	1.15608	down
Com_18609_pos	1,2-di(3,4-dimethoxyphenyl)diaz-1-ene	C16 H18 N2 O4	302.127	10.403	303.134	Full match	No results	No results	1.76489	0.819579	8.46129e-06	1	1.17162	up
Com_8026_pos	Etiocholanolone	C19 H30 O2	272.214	13.461	273.221	Invalid mass	No results	No results	1.69577	0.76194	8.62534e-06	1	1.143	up
Com_4631_pos	Tracheloside	C27 H34 O12	550.206	8.923	551.213	No results	No results	Full match	0.660959	-0.597367	8.81248e-06	1	1.17129	down
Com_19931_pos	Senecionine	C18 H25 N O5	335.176	10.594	336.183	Invalid mass	No results	No results	2.0829	1.05859	9.01045e-06	1	1.17388	up
Com_15771_pos	Glu-Glu	C10 H14 N2 O7	274.08	1.472	275.088	No results	No results	Full match	3.80468	1.92778	9.12173e-06	1	1.18243	up
Com_13791_pos	ethyl 4-amino-2-(methylsulfanyl)-1,3-thiazole-5-carboxylate	C7 H10 N2 O2 S2	218.022	12.902	219.029	Invalid mass	No results	No results	0.30954	-1.6918	1.05777e-05	1	1.15861	down
Com_18090_pos	2-[2-(1-isobutylcyclohexyl)-1-methylethylidene]hydrazine-1-carboxamide	C14 H27 N3 O	582.35	5.996	292.182	Invalid mass	No results	No results	0.464883	-1.10506	1.0718e-05	1	1.15372	down
Com_12444_pos	FPH	C20 H25 N5 O4	421.168	7.413	422.175	Invalid mass	No results	No results	0.651602	-0.617937	1.09853e-05	1	1.14713	down
Com_1121_pos	2,6-Di-tert-butyl-1,4-benzoquinone	C14 H20 O2	220.147	12.645	221.154	Full match	No results	No results	0.344363	-1.538	1.14139e-05	1	1.1733	down
Com_1943_pos	3,4-dihydro-4-oxo-2H-1,3-benzoxazine-2-spiro-4'-(1'-ethylpiperidine)	C20 H26 N2 O6 S	422.156	11.537	423.163	Invalid mass	No results	No results	1.77744	0.829801	1.18658e-05	1	1.18132	up
Com_232_pos	PC (14:0e/2:0)	C24 H50 N O7 P	495.333	14.985	496.34	No results	Full match	Full match	0.385275	-1.37604	1.29323e-05	1	1.1791	down
Com_16866_pos	4-(3-methoxy-5,6-dihydrobenzo[c]acridin-7-yl)morpholine	C22 H22 N2 O2	346.161	7.26	347.168	Invalid mass	No results	No results	1.55186	0.633998	1.35127e-05	1	1.1788	up
Com_2299_pos	(2E,4E)-N-(2-methylpropyl)deca-2,4-dienamide	C14 H25 N O	223.194	14.945	224.201	Full match	No results	No results	0.492324	-1.02232	1.38377e-05	1	1.18136	down
Com_17343_pos	Tanshinone I	C18 H12 O3	276.079	8.262	277.086	No results	No results	Full match	0.512116	-0.965457	1.4295e-05	1	1.169	down
Com_3153_pos	Docosahexaenoic acid	C22 H32 O2	328.24	13.578	329.248	Full match	No results	No results	1.77164	0.825087	1.48213e-05	1	1.16459	up
Com_16143_pos	PC (16:1e/3:0)	C27 H54 N O7 P	535.374	14.958	536.381	No results	Invalid mass	No results	0.423358	-1.24005	1.53375e-05	1	1.13646	down
Com_14994_pos	Andrographolide	C20 H30 O5	350.207	11.792	351.215	Invalid mass	No results	No results	2.36433	1.24143	1.62562e-05	1	1.13813	up
Com_22175_pos	ethyl 4-[(5-chloro-3-pyridyl)oxy]-5,8-difluoroquinoline-3-carboxylate	C17 H11 Cl F2 N2 O3	364.047	4.298	365.054	Invalid mass	No results	No results	1.7202	0.782575	1.64981e-05	1	1.14107	up
Com_20570_pos	(2E)-1-(2-hydroxy-3,4,5,6-tetramethoxyphenyl)-3-phenylprop-2-en-1-one	C19 H20 O6	344.123	6.47	345.131	Invalid mass	No results	No results	2.45096	1.29335	1.67844e-05	1	1.16881	up
Com_6516_pos	NNK	C14 H26 N6 O6	356.182	10.972	357.189	Invalid mass	No results	No results	0.534389	-0.904037	1.70839e-05	1	1.12981	down
Com_678_pos	2-Phenylglycine	C8 H9 N O2	151.064	1.947	152.071	Full match	Full match	Full match	51.8298	5.69571	1.83929e-05	1	1.19789	up
Com_18083_pos	Ziyuglycoside I	C41 H66 O13	766.449	14.929	767.456	No results	No results	Full match	2.1376	1.09599	1.89945e-05	1	1.13916	up
Com_6854_pos	N-(morpholinocarbonyl)-4-(morpholinosulfonyl)benzamide	C16 H21 N3 O6 S	383.122	5.655	384.13	Invalid mass	No results	No results	0.663346	-0.592166	1.92483e-05	1	1.15525	down
Com_11718_pos	DL-threitol	C4 H10 O4	122.058	1.471	123.065	No results	No results	Full match	3.15994	1.6599	1.98671e-05	1	1.17397	up
Com_10693_pos	2,6-Diaminooimelic Acid	C7 H14 N2 O4	190.095	1.466	191.103	No results	No results	Full match	1.68817	0.755458	2.02186e-05	1	1.15412	up
Com_24605_pos	Moslosooflavone	C17 H14 O5	298.085	7.318	299.092	No results	No results	Full match	1.70938	0.77347	2.04709e-05	1	1.12825	up
Com_21657_pos	WMH	C22 H28 N6 O4 S	472.194	11.222	473.202	Invalid mass	No results	No results	2.90639	1.53923	2.14923e-05	1	1.14163	up
Com_20055_pos	Robinetin	C15 H10 O7	302.04	6.045	303.048	Invalid mass	No results	No results	0.333059	-1.58615	2.31962e-05	1	1.15032	down
Com_20667_pos	8,8-dimethyl-2-phenyl-4H,8H-pyrano[2,3-h]chromen-4-one	C20 H16 O3	304.114	3.883	305.121	Invalid mass	No results	No results	1.7081	0.772392	2.32977e-05	1	1.17112	up
Com_6780_pos	Pterosin B	C14 H18 O2	218.131	9.444	219.138	No results	No results	Full match	1.63752	0.711513	2.57495e-05	1	1.17221	up
Com_8417_pos	Euphorbiasteroid	C32 H40 O8	552.271	14.359	553.278	No results	No results	Full match	0.424563	-1.23595	2.59512e-05	1	1.13394	down
Com_14793_pos	Aloenin	C19 H22 O10	410.123	9.156	411.131	No results	Invalid mass	No results	2.41843	1.27407	2.62714e-05	1	1.15194	up
Com_108_pos	D-threo-Isocitric acid	C6 H8 O7	192.027	2.189	193.035	No results	No results	Full match	2.5444	1.34733	2.7129e-05	1	1.19022	up
Com_9132_pos	(-)-N-[3',4'-Dihydroxy-(E)-cinnamoyl]-L-glutamic acid	C14 H15 N O7	309.085	8.25	310.092	No results	No results	Full match	0.51858	-0.947362	2.74913e-05	1	1.17329	down
Com_7720_pos	Parthenolide	C15 H20 O3	248.139	9.13	249.147	No results	Invalid mass	No results	1.78199	0.833485	2.76058e-05	1	1.15743	up
Com_16674_pos	PC (14:1e/6:0)	C28 H56 N O7 P	549.38	15.656	550.388	No results	Full match	No results	0.355067	-1.49384	2.8283e-05	1	1.13081	down
Com_5770_pos	Cytidine	C9 H13 N3 O5	243.086	1.511	244.093	Full match	Full match	Full match	1.69688	0.762883	2.86535e-05	1	1.18053	up
Com_8859_pos	Acetyl-11-keto-尾-boswellic acid	C32 H48 O5	512.351	14.969	513.359	No results	Full match	Full match	0.480973	-1.05597	2.8811e-05	1	1.13836	down
Com_8664_pos	MAG (18:4)	C21 H34 O4	350.247	10.843	351.254	No results	No results	Full match	0.616126	-0.698704	2.98756e-05	1	1.14222	down
Com_17578_pos	Fisetin	C15 H10 O6	286.052	6.87	287.059	Invalid mass	No results	No results	0.63633	-0.652152	3.02432e-05	1	1.18465	down
Com_3100_pos	Tricin 5-O-hexoside	C23 H24 O12	492.128	10.578	493.133	No results	No results	Full match	1.63216	0.706786	3.06418e-05	1	1.1209	up
Com_2656_pos	Benzoic Acid	C7 H6 O2	122.037	8.294	123.044	No results	No results	Full match	1.55982	0.641383	3.07728e-05	1	1.13981	up
Com_3396_pos	Ligustilide	C12 H14 O2	190.1	10.479	191.107	No results	Full match	Full match	1.51094	0.595449	3.10218e-05	1	1.15643	up
Com_2935_pos	5伪-Dihydrotestosterone	C19 H30 O2	290.225	14.252	291.232	Full match	No results	No results	1.96076	0.971412	3.25502e-05	1	1.18115	up
Com_15847_pos	N,N-dimethyl-5-nitro-6-[3-(trifluoromethyl)phenoxy]pyrimidin-4-amine	C13 H11 F3 N4 O3	328.078	5.617	329.085	Full match	No results	No results	1.50682	0.591511	3.30946e-05	1	1.13661	up
Com_3868_pos	2-Amino-1,3,4-octadecanetriol	C18 H39 N O3	317.293	12.232	318.3	Full match	No results	Full match	0.551581	-0.858356	3.65866e-05	1	1.11787	down
Com_3313_pos	N1-(1H-1,2,3-benzotriazol-5-yl)-3,4,5-trimethoxybenzamide	C16 H16 N4 O4	328.114	8.829	329.122	Invalid mass	No results	No match	82.3213	6.36319	3.66206e-05	1	1.19095	up
Com_22038_pos	Procyanidin B2	C30 H26 O12	578.144	8.893	579.152	No results	No results	Full match	0.349683	-1.51588	3.67019e-05	1	1.12828	down
Com_4234_pos	ethyl 3-[2-(tert-butyl)-4-(1,3-thiazol-2-yl)phenyl]-2-cyanoacrylate	C19 H20 N2 O2 S	388.127	10.981	389.135	Invalid mass	No results	No results	0.304617	-1.71493	3.84673e-05	1	1.1536	down
Com_2900_pos	(2R)-2-[(2R,5S)-5-[(2S)-2-hydroxybutyl]oxolan-2-yl]propanoic acid	C11 H20 O4	198.126	11.982	199.133	Invalid mass	No results	No results	1.74842	0.806054	3.95214e-05	1	1.17099	up
Com_4570_pos	Wilforlide A	C30 H46 O3	454.345	10.413	455.353	No results	No results	Full match	2.11287	1.07921	4.00755e-05	1	1.18025	up
Com_1911_pos	Pimpinellin	C13 H10 O5	246.053	2.157	247.061	No results	No results	Full match	0.517121	-0.951426	4.57454e-05	1	1.14605	down
Com_1917_pos	2-phenyl-4H-furo[2,3-h]chromen-4-one	C17 H10 O3	262.067	1.339	263.074	Invalid mass	No results	No results	2.36727	1.24322	4.62036e-05	1	1.13886	up
Com_5151_pos	N-(8-methyl-8-azabicyclo[3.2.1]oct-3-yl)-4-nitrobenzamide	C15 H19 N3 O3	311.123	2.28	312.131	Invalid mass	No results	No match	0.473557	-1.07839	4.62179e-05	1	1.13089	down
Com_27047_pos	N-Acetyl-L-histidine	C8 H11 N3 O3	197.079	1.495	395.166	No results	No results	Full match	1.88958	0.918065	5.18377e-05	1	1.11886	up
Com_22127_pos	Hesperidin	C28 H34 O15	610.202	8.82	611.21	Invalid mass	No results	No results	0.522421	-0.936715	5.21964e-05	1	1.11339	down
Com_3842_pos	Glycyrrhetinic acid	C30 H46 O4	470.341	12.214	471.349	No results	No results	Full match	2.02499	1.01791	5.36761e-05	1	1.14639	up
Com_18002_pos	1,3-dimethyl 2,4-bis(4-hydroxyphenyl)cyclobutane-1,3-dicarboxylate	C20 H20 O6	356.127	6.6	357.134	Full match	No results	Full match	0.63922	-0.645614	5.62482e-05	1	1.10502	down
Com_13698_pos	6,7,4'-Trihydroxyisoflavone	C15 H10 O5	270.053	10.213	271.061	No results	No results	Full match	0.489299	-1.03121	5.69101e-05	1	1.15952	down
Com_16948_pos	2-chloro-6-(3,5-dimethyl-1H-pyrazol-1-yl)benzonitrile	C12 H10 Cl N3	249.064	13.777	250.071	Invalid mass	No results	No results	1.83407	0.875045	5.81374e-05	1	1.12054	up
Com_23081_pos	Petunidin-3-O-glucoside chloride	C22 H23 Cl O12	514.09	10.622	515.097	No results	No results	Full match	0.438274	-1.19009	6.28056e-05	1	1.14482	down
Com_12727_pos	Menaquinone	C31 H40 O2	444.303	12.423	445.311	No results	No results	Full match	2.38496	1.25396	6.41543e-05	1	1.10116	up
Com_10954_pos	Ginkgolide K	C20 H22 O9	406.127	10.207	407.134	No results	Full match	Full match	0.650535	-0.6203	6.98415e-05	1	1.13172	down
Com_14740_pos	Lancerin	C19 H18 O10	406.088	9.016	407.096	No results	No results	Full match	2.28804	1.19411	7.35651e-05	1	1.14399	up
Com_12879_pos	Cinchophen	C16 H11 N O2	249.079	14.521	250.087	Full match	No results	No results	0.651013	-0.619242	7.44803e-05	1	1.11413	down
Com_5101_pos	Hypoxanthine	C5 H4 N4 O	136.039	3.659	137.046	Full match	Full match	Full match	1.55378	0.635787	8.13791e-05	1	1.17266	up
Com_11370_pos	5-(4-methylphenyl)-2-phenyl-6H-1,3-thiazin-6-one	C17 H13 N O S	297.085	1.511	298.092	Invalid mass	No results	No results	0.574261	-0.800222	8.2074e-05	1	1.11643	down
Com_9533_pos	Capric acid	C10 H20 O2	172.147	8.893	173.154	No results	No results	Full match	2.45662	1.29668	8.43167e-05	1	1.09378	up
Com_4353_pos	Isomucronulatol	C17 H18 O5	302.116	9.181	303.123	No results	No results	Full match	0.592191	-0.755866	9.25733e-05	1	1.15397	down
Com_1926_pos	Pachymic acid	C33 H52 O5	528.382	14.902	529.389	No results	Full match	No results	0.362188	-1.46519	9.36442e-05	1	1.11907	down
Com_957_pos	1-(4-methoxyphenyl)propane-1,2-diol	C10 H14 O3	164.084	8.44	165.091	Invalid mass	No results	No match	39.3841	5.29954	9.40365e-05	1	1.17617	up
Com_9998_pos	Myrislignan	C21 H26 O6	374.173	8.997	375.18	No results	No results	Full match	0.415478	-1.26716	9.41231e-05	1	1.14168	down
Com_106_pos	Quercetin	C15 H10 O7	302.043	9.449	303.05	Full match	Full match	Full match	0.613876	-0.70398	9.63802e-05	1	1.17382	down
Com_23932_pos	N-{3-[(3,5-difluorobenzyl)oxy]pyridin-2-yl}-4-pentylbenzenesulfonamide	C23 H24 F2 N2 O3 S	446.156	7.03	447.163	Invalid mass	No results	No results	0.34529	-1.53412	9.98874e-05	1	1.13875	down
Com_16656_pos	伪-Aspartylphenylalanine	C13 H16 N2 O5	280.106	7.753	281.114	Full match	No results	Full match	2.1939	1.13349	0.000101303	1	1.14968	up
Com_8123_pos	Yangonin	C15 H14 O4	258.089	7.634	259.097	No results	No results	Full match	19.4793	4.28387	0.000124611	1	1.1284	up
Com_15090_pos	Isoquercitrin	C21 H20 O12	442.112	8.275	443.119	No results	Invalid mass	No results	4.26496	2.09253	0.000124967	1	1.14129	up
Com_2137_pos	3-(2,3-dihydroxy-5-methylphenoxy)-5-methylbenzene-1,2-diol	C14 H14 O5	262.085	7.751	263.092	Full match	No results	No results	2.29179	1.19648	0.000128699	1	1.09408	up
Com_6081_pos	Pristimerin	C30 H40 O4	464.294	11.68	465.301	No results	No results	Full match	0.353493	-1.50025	0.000132488	1	1.14924	down
Com_8740_pos	2-[(1-benzothiophen-3-ylmethyl)amino]-1-phenylethan-1-ol	C17 H17 N O S	305.081	1.543	306.088	Invalid mass	No results	No results	1.63231	0.706911	0.00013396	1	1.14928	up
Com_16068_pos	diethyl 2-[(4-benzhydrylpiperidino)methylidene]malonate	C26 H31 N O4	459.181	10.64	460.188	Invalid mass	No results	No results	1.91503	0.937366	0.000136562	1	1.11379	up
Com_2540_pos	4-methoxy-6-(prop-2-en-1-yl)-2H-1,3-benzodioxole	C11 H12 O3	192.079	8.425	193.086	Full match	No results	Full match	1.71528	0.778444	0.000144866	1	1.13104	up
Com_6011_pos	Indole-3-acetic acid	C10 H9 N O2	175.064	13.036	176.071	Full match	No results	Full match	1.55939	0.640978	0.000151975	1	1.14276	up
Com_21343_pos	beta-Acetoxyisovalerylalkannin	C23 H26 O8	430.165	10.384	431.172	No results	No results	Full match	1.98349	0.988042	0.00015326	1	1.10053	up
Com_23390_pos	ABL 127	C17 H20 N2 O5	354.111	10.828	355.119	Invalid mass	No results	No match	0.605347	-0.724165	0.000159372	1	1.12811	down
Com_11979_pos	Astragaloside II	C43 H70 O15	826.469	13.945	827.476	No results	No results	Full match	0.409158	-1.28927	0.000160694	1	1.07523	down
Com_13007_pos	Medroxyprogesterone	C22 H32 O3	344.235	11.502	345.243	Full match	No results	No results	1.77737	0.829741	0.000165575	1	1.1144	up
Com_12284_pos	N-[(-)-Jasmonoyl]-(L)-Isoleucine	C18 H29 N O4	323.21	10.62	324.217	No results	No results	Full match	1.86247	0.897213	0.000169863	1	1.15939	up
Com_3781_pos	2,3-di(acetyloxy)-3-cyano-1-[1,2-di(acetyloxy)ethyl]propyl acetate	C16 H21 N O10	387.117	6.452	388.124	Full match	No results	No results	0.596116	-0.746336	0.000176711	1	1.08988	down
Com_20618_pos	Tectochrysin	C16 H12 O4	268.074	7.984	269.081	No results	No results	Full match	1.80937	0.855486	0.000179124	1	1.07245	up
Com_52_pos	Pheophorbide A	C35 H36 N4 O5	592.269	15.685	593.276	No results	No results	Full match	0.430761	-1.21504	0.000187347	1	1.15055	down
Com_20346_pos	Vincosamide	C26 H30 N2 O8	498.198	9.559	499.205	No results	No results	Full match	3.65892	1.87142	0.000198846	1	1.16112	up
Com_857_pos	Prolylleucine	C11 H20 N2 O3	228.148	1.947	229.155	Full match	No results	Full match	1.59622	0.674659	0.000203676	1	1.12126	up
Com_1787_pos	16,16-Dimethyl prostaglandin A1	C22 H36 O4	386.246	12.396	387.253	Invalid mass	No match	No match	2.00227	1.00164	0.000204352	1	1.07721	up
Com_1014_pos	7-(2-hydroxypropan-2-yl)-1,4a-dimethyl-decahydronaphthalen-1-ol	C15 H28 O2	222.199	15.258	240.232	Invalid mass	No results	No match	0.380955	-1.39231	0.000205891	1	1.14411	down
Com_7918_pos	ENH	C15 H22 N6 O7	398.156	10.133	399.163	Full match	No results	No results	1.56253	0.643881	0.000206175	1	1.0857	up
Com_16499_pos	Notopterol	C21 H22 O5	354.147	9.824	355.154	No results	Full match	Full match	1.87379	0.905959	0.000217897	1	1.1201	up
Com_22676_pos	Quercitrin	C21 H20 O11	448.101	8.85	449.108	No results	Full match	Full match	2.253	1.17185	0.000218021	1	1.06829	up
Com_4080_pos	Olivetol	C11 H16 O2	180.115	11.981	181.122	No results	No results	Full match	1.71299	0.776515	0.000219048	1	1.13352	up
Com_3037_pos	Decursin	C19 H20 O5	328.132	7.973	329.139	No results	No results	Full match	0.658158	-0.603495	0.000224505	1	1.09439	down
Com_12715_pos	S-Adenosylmethionine	C15 H22 N6 O5 S	199.069	1.314	399.145	Invalid mass	Invalid mass	No results	1.73936	0.798555	0.000231366	1	1.06469	up
Com_12256_pos	Glycyl-L-valine	C7 H14 N2 O3	174.101	1.515	175.108	No results	No results	Full match	1.53942	0.622389	0.000234392	1	1.12065	up
Com_7606_pos	Irisflorentin	C20 H18 O8	386.101	10.116	387.108	No results	No results	Full match	0.196181	-2.34974	0.000248297	1	1.13404	down
Com_357_pos	Cinnamic acid	C9 H8 O2	148.053	9.595	149.06	No results	Full match	Full match	0.575295	-0.797627	0.000248741	1	1.15069	down
Com_14508_pos	5-benzyl-4-hydroxy-6H-pyrido[3,2,1-jk]carbazol-6-one	C22 H15 N O2	347.099	7.043	348.106	Invalid mass	No results	No results	4.40545	2.13929	0.000261029	1	1.13005	up
Com_9456_pos	7-Epitaxol	C47 H51 N O14	853.328	8.583	854.336	No results	No results	Full match	0.457088	-1.12946	0.000273932	1	1.07619	down
Com_4647_pos	6 尾-Hydroxycortisol	C21 H30 O6	378.205	13.578	379.212	Full match	No results	No results	1.57143	0.652079	0.000284031	1	1.1119	up
Com_4452_pos	Sinensetin	C20 H20 O7	372.122	8.574	373.129	No results	Full match	Full match	0.585213	-0.772967	0.000287066	1	1.13704	down
Com_19085_pos	4-[8-chloro-2-(trifluoromethyl)-4-quinolyl]morpholine	C14 H12 Cl F3 N2 O	316.06	7.806	317.067	Full match	No match	No match	10.5046	3.39294	0.000296332	1	1.1485	up
Com_651_pos	4-Hydroxy-2,5-dimethyl-3(2H)furanone	C6 H8 O3	128.048	1.519	129.055	No results	No results	Full match	1.60768	0.684981	0.000306127	1	1.06069	up
Com_5972_pos	5伪-Tetrahydrocortisol	C21 H34 O5	754.449	15.044	755.456	Invalid mass	No results	No results	2.69504	1.43031	0.000313652	1	1.10628	up
Com_22266_pos	Nuzhenide	C31 H42 O17	686.243	10.313	687.251	No results	No results	Full match	0.552525	-0.855889	0.00031845	1	1.08994	down
Com_6115_pos	JWH 018 N-(5-hydroxypentyl) 尾-D-Glucuronide	C30 H31 N O8	533.212	9.825	534.219	Invalid mass	No results	No results	0.435427	-1.1995	0.000344504	1	1.0835	down
Com_13867_pos	Apigenin C-pentoside	C20 H18 O9	402.094	8.694	403.101	No results	No results	Full match	4.35056	2.1212	0.000351263	1	1.11618	up
Com_470_pos	(3beta,9xi)-3-(beta-D-Glucopyranosyloxy)-14-hydroxycard-20(22)-enolide	C29 H44 O9	536.297	14.356	537.304	Full match	No results	No results	0.623671	-0.681144	0.000351626	1	1.09134	down
Com_1301_pos	(+)-ar-Turmerone	C15 H20 O	216.152	12.645	217.159	Full match	No results	Full match	0.522664	-0.936043	0.000354746	1	1.08875	down
Com_3380_pos	NAT13-331713_POS	C26 H30 N4 O3	462.211	11.71	463.218	Invalid mass	No results	No results	3.19723	1.67682	0.000358155	1	1.14459	up
Com_7410_pos	TQH	C15 H24 N6 O6	384.177	10.904	385.184	Full match	No results	No match	2.16204	1.11239	0.000358854	1	1.13802	up
Com_1953_pos	Stachydrine	C7 H13 N O2	143.095	2.07	144.102	No results	No results	Full match	0.534639	-0.903363	0.000358956	1	1.13014	down
Com_9216_pos	Wedelolactone	C16 H10 O7	138.044	9.517	139.05	No results	Invalid mass	No match	1.77363	0.826707	0.000371374	1	1.10845	up
Com_15565_pos	trans-zeatin 9-O-glucoside	C16 H23 N5 O6	381.164	6.029	382.171	No results	No results	Full match	0.630548	-0.665321	0.000380334	1	1.10302	down
Com_13427_pos	1-(4-ethoxyphenyl)-5-(prop-2-ynylthio)-1H-1,2,3,4-tetraazole	C12 H12 N4 O S	260.07	7.342	261.077	Invalid mass	No results	No results	1.59811	0.676365	0.000521082	0.972222	1.06236	up
Com_10592_pos	Asp-glu	C9 H14 N2 O7	262.08	1.515	263.088	No results	No results	Full match	1.80704	0.853631	0.000597047	1	1.11963	up
Com_20553_pos	1-(1,3-benzodioxol-5-ylmethyl)-5-oxopyrrolidine-3-carboxylic acid	C13 H13 N O5	263.08	6.566	264.087	Full match	No results	No results	0.573505	-0.802121	0.000608456	1	1.12345	down
Com_10068_pos	Bergapten	C12 H8 O4	216.043	13.21	217.05	No results	No results	Full match	0.206478	-2.27594	0.000701349	1	1.10406	down
Com_21681_pos	N-Methyl-L-arginine hydrochloride	C7 H17 Cl N4 O2	224.104	7.716	225.111	No results	No results	Full match	2.34361	1.22873	0.000743917	1	1.08217	up
Com_1563_pos	Catechol	C6 H6 O2	110.037	1.52	111.044	No results	No results	Full match	1.8411	0.880572	0.000762686	0.944444	1.02494	up
Com_8994_pos	Ochratoxin A	C20 H18 Cl N O6	403.089	7.974	404.096	Invalid mass	No results	No results	3.9558	1.98397	0.000785099	1	1.11912	up
Com_7283_pos	5-[(2-chloro-6-phenoxybenzyl)amino]-3,3-dimethyl-5-oxopentanoic acid	C20 H22 Cl N O4	397.099	7.714	398.106	Invalid mass	No results	No results	1.50738	0.592047	0.000820046	1	1.08773	up
Com_18579_pos	4-Demethylepipodophyllotoxin	C21 H20 O8	400.117	11.181	401.125	No results	No results	Full match	0.62496	-0.678165	0.000866961	1	1.02003	down
Com_3986_pos	N,5-Bis(3-nitrophenyl)oxazol-2-amine	C15 H10 N4 O5	326.062	3.437	327.069	Invalid mass	No results	No results	0.646546	-0.629174	0.000869594	0.972222	1.02739	down
Com_19397_pos	Paederosidic acid	C18 H24 O12 S	464.099	8.499	465.106	No results	No results	Full match	0.580976	-0.78345	0.0010283	0.972222	1.02851	down
Com_5167_pos	Alisol B	C30 H48 O4	472.356	11.328	473.363	No results	No results	Full match	1.6045	0.68212	0.00104239	1	1.01764	up
Com_22878_pos	Galloylpaeoniflorin	C30 H32 O15	632.173	8.643	633.181	No results	No results	Full match	0.367393	-1.4446	0.00108672	1	1.01644	down
Com_3964_pos	SQH	C14 H22 N6 O6	370.161	8.184	371.169	Full match	No results	No results	1.75864	0.814462	0.00110328	1	1.08112	up
Com_16326_pos	N-(3,5-dimethyl-4-isoxazolyl)-N'-(2-phenoxyethyl)urea	C14 H17 N3 O3	297.108	1.919	298.115	Invalid mass	No results	No match	0.608676	-0.716254	0.00111406	1	1.04039	down
Com_11373_pos	Alanyltyrosine	C12 H16 N2 O4	252.111	6.958	253.119	Full match	No results	No results	1.78244	0.833851	0.00111754	1	1.09198	up
Com_805_pos	ethyl 3-hydroxy-4,6-dimethoxy-2-oxoindoline-3-carboxylate	C13 H15 N O6	281.09	8.557	282.097	Full match	No results	No results	0.495687	-1.0125	0.00116242	1	1.08904	down
Com_22638_pos	Icariin	C33 H40 O15	698.219	8.432	699.226	Invalid mass	No results	No results	0.509244	-0.973571	0.00124127	1	1.0172	down
Com_653_pos	1-Aminocyclohexanecarboxylic acid	C7 H13 N O2	143.095	1.759	144.102	Full match	No results	Full match	4.67004	2.22344	0.00124214	1	1.03007	up
Com_2645_pos	Ketoisophorone	C9 H12 O2	152.084	9.274	153.091	No results	No results	Full match	2.33285	1.22209	0.00129866	1	1.08698	up
Com_9169_pos	4-Hydroxyisoleucine	C6 H13 N O3	147.09	1.334	148.097	No results	No results	Full match	1.55811	0.639793	0.00133049	1	1.00135	up
Com_4877_pos	(卤)11(12)-EET	C20 H32 O3	320.233	14.641	321.241	Invalid mass	No results	No results	1.51406	0.598421	0.00142008	1	1.06832	up
Com_15652_pos	N'-hydroxy-3-nitrobenzenecarboximidamide	C7 H7 N3 O3	181.05	7.822	182.058	Invalid mass	No results	No results	1.60062	0.678631	0.00142677	1	1.06061	up
Com_24309_pos	Dehydroevodiamine	C19 H15 N3 O	301.122	7.499	302.13	No results	No results	Full match	1.85388	0.890545	0.00149973	1	1.03283	up
Com_4558_pos	Piceatannol	C14 H12 O4	244.074	7.746	245.081	Full match	Full match	Full match	2.35722	1.23709	0.00159017	1	1.07306	up
Com_13419_pos	Rhein 8-Glucoside	C21 H18 O11	446.083	8.896	447.091	No results	No results	Full match	0.401356	-1.31704	0.00167394	1	1.08142	down
Com_15629_pos	3-[(5-nitropyridin-2-yl)oxy]-1H-indazole	C12 H8 N4 O3	256.056	7.019	257.064	Invalid mass	No results	No results	2.51074	1.32811	0.00169002	1	1.0454	up
Com_5083_pos	5-[(10Z)-14-(3,5-dihydroxyphenyl)tetradec-10-en-1-yl]benzene-1,3-diol	C26 H36 O4	412.261	12.319	413.268	Full match	No results	No results	0.436912	-1.19459	0.00233182	1	1.02478	down
Com_3470_pos	Lipoamide	C8 H15 N O S2	205.059	2.299	206.066	No results	No results	Full match	2.58613	1.3708	0.00236402	1	1.02443	up
Com_23612_pos	Colchicoside	C27 H33 N O11	569.192	8.142	570.198	Invalid mass	No results	No results	0.337018	-1.5691	0.00244352	1	1.06344	down
Com_3416_pos	1-Naphthaleneacetic acid	C12 H10 O2	186.068	8.182	187.076	No results	No results	Full match	0.606759	-0.720804	0.00252392	1	1.04666	down
Com_11777_pos	Citrinin	C13 H14 O5	250.083	6.334	251.09	Full match	No results	No results	0.490193	-1.02858	0.00284389	1	1.04059	down
Com_18072_pos	Tricin	C17 H14 O7	330.074	9.304	331.082	No results	No results	Full match	2.90411	1.5381	0.00359247	1	1.02936	up
Com_7747_pos	1-(7-methoxy-2-oxo-2H-chromen-8-yl)-3-methyl-2-oxobutyl acetate	C17 H18 O6	340.096	8.914	341.103	Invalid mass	No results	No match	0.58805	-0.765989	0.00372603	1	1.02076	down
Com_11949_pos	Loureirin A	C17 H18 O4	286.121	7.019	287.128	No results	No results	Full match	3.11929	1.64122	0.00378539	0.944444	1.03187	up
Com_285_pos	Sinapaldehyde glucoside	C17 H22 O9	370.125	7.424	371.133	No results	No results	Full match	32.743	5.03311	0.00402359	1	1.03421	up
Com_2278_pos	Isorhapontigenin	C15 H14 O4	258.09	8.424	259.097	Full match	Full match	Full match	4.16767	2.05924	0.00402724	1	1.02744	up
Com_10187_pos	Schizandrol A	C24 H32 O7	432.216	11.401	433.223	No results	No results	Full match	4.54929	2.18564	0.00473215	1	1.02038	up
Com_3860_pos	Guanosine-3',5'-cyclic monophosphate	C10 H12 N5 O7 P	345.048	2.793	346.055	No results	Full match	Full match	2.20758	1.14246	0.00548273	1	1.0098	up
Com_121_pos	Chelidonic acid	C7 H4 O6	184.001	2.457	185.008	No results	No results	Full match	0.602876	-0.730068	0.00562485	1	1.00262	down

## Sheet: LB vs. HB_neg
Differential metabolites in Haloxylon persicum under negative ion mode
ID	Name	Formula	Molecular Weight	RT [min]	m/z	mzCloud_Results	mzVault_Results	MassList_Results	FC	log2FC	Pvalue	ROC	VIP	Up/Down
Com_13856_neg	N1-(4-bromophenyl)-2-[4-(tert-butyl)phenoxy]propanamide	C19 H22 Br N O2	375.084	7.47	374.077	Full match	No results	No results	119.715	6.90346	3.94411e-20	1	1.19988	up
Com_3366_neg	2-Isopropylmalic acid	C7 H12 O5	176.069	1.737	175.062	Full match	Full match	Full match	14.0065	3.80803	1.65518e-17	1	1.19964	up
Com_563_neg	Pelargonidin chloride	C15 H11 Cl O5	306.031	1.313	305.024	No results	No results	Full match	6.52506	2.70599	7.07934e-17	1	1.19956	up
Com_817_neg	4-Anisic acid	C8 H8 O3	152.048	8.016	151.041	Full match	Full match	Full match	3.76474	1.91255	1.26599e-15	1	1.19911	up
Com_3744_neg	4-Acetamidobutyric Acid	C6 H11 N O3	145.074	1.507	144.067	No results	No results	Full match	3.25964	1.70471	8.99819e-15	1	1.19875	up
Com_1394_neg	Combretastatin A4	C18 H20 O5	316.132	7.338	361.13	No results	No results	Full match	0.410614	-1.28415	1.02194e-14	1	1.1987	down
Com_29_neg	Plantagoside	C21 H22 O12	466.111	9.612	465.104	No results	No results	Full match	0.664587	-0.589469	5.73594e-14	1	1.19832	down
Com_150_neg	Gardenoside	C17 H24 O11	404.133	8.225	403.126	No results	No results	Full match	0.559666	-0.837363	1.44876e-13	1	1.19784	down
Com_147_neg	Sinapoyl O-hexoside	C17 H22 O10	386.122	8.221	385.114	No results	No results	Full match	0.557791	-0.842204	2.51026e-13	1	1.19773	down
Com_206_neg	Gluconolactone	C6 H10 O6	178.048	1.239	177.041	No results	No results	Full match	2.87523	1.52368	2.66602e-13	1	1.19791	up
Com_120_neg	D-Saccharic acid	C6 H10 O8	210.038	1.202	209.031	Full match	Full match	Full match	2.22507	1.15385	3.34255e-13	1	1.19852	up
Com_12898_neg	Cysteinylglycine	C5 H10 N2 O3 S	178.038	5.309	177.031	Invalid mass	No results	No results	2.71635	1.44167	3.42796e-13	1	1.19901	up
Com_537_neg	p-Coumaric acid ethyl ester	C11 H12 O3	192.079	10.085	191.072	No results	No results	Full match	0.605985	-0.722647	4.85381e-13	1	1.19825	down
Com_1007_neg	Scutellarin	C21 H18 O12	462.081	9.241	461.073	No results	Full match	Full match	0.650695	-0.619947	7.39945e-13	1	1.19804	down
Com_412_neg	N-Feruloyltyramine	C18 H19 N O4	313.132	10.112	312.124	No results	No results	Full match	7.41866	2.89116	1.19433e-12	1	1.19966	up
Com_1318_neg	1,3,5-Trimethoxybenzene	C9 H12 O3	168.079	7.424	167.072	No results	No results	Full match	184.053	7.52398	1.36671e-12	1	1.19987	up
Com_17857_neg	Artesunate	C19 H28 O8	384.179	8.047	383.172	No results	No results	Full match	3.25245	1.70153	1.4353e-12	1	1.19803	up
Com_22020_neg	Pseudoprotodioscin	C51 H82 O21	1030.54	12.016	514.262	No results	No results	Full match	4.3789	2.13057	1.96862e-12	1	1.19648	up
Com_3_neg	Chikusetsu saponin IVa	C42 H66 O14	794.446	12.366	793.439	No results	Full match	Full match	0.477186	-1.06738	2.08515e-12	1	1.19724	down
Com_1461_neg	3,5-dimethyl-N'-[4-(trifluoromethyl)benzoyl]isoxazole-4-carbohydrazide	C14 H12 F3 N3 O3	328.083	7.014	327.076	Invalid mass	No results	No results	3.84583	1.9433	2.64355e-12	1	1.19724	up
Com_13294_neg	Dodecanedioic acid	C12 H22 O4	230.152	9.224	229.145	Full match	No results	Full match	0.196079	-2.35049	3.62751e-12	1	1.19593	down
Com_8495_neg	1,5,8-Trihydroxy-9-oxo-9H-xanthen-3-yl beta-D-glucopyranoside	C19 H18 O11	422.089	7.386	421.082	Invalid mass	No results	No results	2.28123	1.18981	3.89241e-12	1	1.19856	up
Com_14804_neg	N-Acetyl-L-Tyrosine	C11 H13 N O4	223.085	1.512	222.078	No results	No results	Full match	6.16279	2.62358	5.5456e-12	1	1.19589	up
Com_946_neg	Wikstromol	C20 H22 O7	374.137	8.265	373.13	No results	No results	Full match	0.336463	-1.57148	7.17446e-12	1	1.19727	down
Com_340_neg	Genipin	C11 H14 O5	208.074	10.085	207.067	Invalid mass	No match	No match	0.599903	-0.737199	8.84426e-12	1	1.19565	down
Com_1474_neg	Astilbin	C21 H22 O11	450.117	8.079	449.109	Full match	No results	Full match	0.385271	-1.37605	1.05745e-11	1	1.19539	down
Com_213_neg	D-(-)-Fructose	C6 H12 O6	180.064	1.368	179.056	Full match	Full match	Full match	1.67153	0.741169	1.36402e-11	1	1.19557	up
Com_1562_neg	Syringenone	C17 H24 O9	372.143	7.73	371.135	No results	No results	Full match	11.1132	3.4742	1.69889e-11	1	1.19914	up
Com_1627_neg	Coniferyl alcohol	C10 H12 O3	180.079	7.355	179.072	No results	Full match	Full match	4.31338	2.10882	3.02734e-11	1	1.1984	up
Com_32_neg	Miquelianin	C21 H18 O13	478.075	8.866	477.067	Full match	Full match	No results	0.577233	-0.792774	3.29695e-11	1	1.19686	down
Com_3091_neg	(3R)-4,4-Dimethyl-2-oxotetrahydro-3-furanyl beta-D-glucopyranoside	C12 H20 O8	338.122	5.998	337.115	Invalid mass	No results	No results	1.99959	0.999705	3.68423e-11	1	1.19588	up
Com_1362_neg	Celastrol	C29 H38 O4	450.275	14.751	449.268	No results	No results	Full match	6.97501	2.8022	5.0748e-11	1	1.19858	up
Com_11207_neg	LPG 18:3	C24 H43 O9 P	506.266	13.987	505.258	No results	Full match	No results	1.76326	0.818242	6.19141e-11	1	1.1933	up
Com_425_neg	N-benzyl-N-isopropyl-N'-[4-(trifluoromethoxy)phenyl]urea	C18 H19 F3 N2 O2	352.137	7.697	351.13	Invalid mass	No results	No results	1.7958	0.844629	7.25531e-11	1	1.19248	up
Com_2457_neg	Isoliquiritin apioside	C26 H30 O13	550.17	9.462	549.162	No results	No results	Full match	0.322136	-1.63426	7.86771e-11	1	1.19486	down
Com_4460_neg	Flavokawain A	C18 H18 O5	314.116	7.217	313.109	No results	No results	Full match	0.462386	-1.11283	7.86795e-11	1	1.19627	down
Com_3369_neg	trans-Cinnamic acid	C9 H8 O2	148.053	7.47	147.045	Full match	No results	Full match	0.603832	-0.727781	8.91921e-11	1	1.19526	down
Com_2082_neg	Guanosine	C10 H13 N5 O5	283.092	3.973	282.085	Full match	Full match	Full match	1.96859	0.97716	9.50076e-11	1	1.195	up
Com_26501_neg	Hematoxylin	C16 H14 O6	302.083	8.733	301.075	No results	Invalid mass	No results	4.26679	2.09315	1.06269e-10	1	1.19272	up
Com_4790_neg	4,5-diphenyl-2,3-dihydro-1H-pyrazolo[3,4-c]pyridazin-3-one	C17 H12 N4 O	288.104	10.334	287.096	Invalid mass	No results	No results	43.6511	5.44795	1.23962e-10	1	1.19932	up
Com_30205_neg	Akebia saponin D	C47 H76 O18	928.502	13.077	927.494	No results	No results	Full match	6.1114	2.6115	1.51728e-10	1	1.19384	up
Com_5272_neg	Naringin	C27 H32 O14	290.09	8.941	579.173	Invalid mass	No results	No match	0.166099	-2.58988	1.77853e-10	1	1.19117	down
Com_17967_neg	D-Ribulose 1,5-bisphosphate	C5 H12 O11 P2	309.986	1.317	618.964	No results	No results	Full match	13.5792	3.76333	1.91274e-10	1	1.19851	up
Com_8931_neg	s7p	C7 H13 Ba O10 P	425.928	1.249	424.92	No results	No results	Full match	37.7248	5.23744	2.1085e-10	1	1.19802	up
Com_1436_neg	Caffeine	C8 H10 N4 O2	194.079	1.394	193.072	Invalid mass	No match	No match	1.7916	0.84125	2.26202e-10	1	1.19135	up
Com_18620_neg	Acetylcysteine	C5 H9 N O3 S	163.031	7.277	162.023	No results	No results	Full match	5.08352	2.34583	2.30835e-10	1	1.19578	up
Com_16246_neg	4-methyl-2-[(2-pyridinylsulfonyl)methyl]-1,3-thiazole-5-carbohydrazide	C11 H12 N4 O3 S2	312.034	2.607	311.026	Full match	No results	No results	0.304019	-1.71777	2.31627e-10	1	1.19084	down
Com_6777_neg	Glutathione	C10 H17 N3 O6 S	307.085	9.159	306.078	No results	No results	Full match	38.2474	5.25729	2.48838e-10	1	1.19927	up
Com_4213_neg	N-Acetyl-L-phenylalanine	C11 H13 N O3	207.09	3.24	206.083	Full match	Full match	Full match	1.75311	0.809916	2.49182e-10	1	1.19499	up
Com_12920_neg	D-Glucaric acid	C6 H10 O8	210.038	1.478	209.031	No results	Full match	Full match	3.14921	1.65499	2.49358e-10	1	1.19051	up
Com_45_neg	Salicylic acid O-glucoside	C13 H16 O8	300.085	9.552	299.077	No results	No results	Full match	0.523137	-0.93474	2.63765e-10	1	1.19782	down
Com_166_neg	Allantoin	C4 H6 N4 O3	158.044	1.406	157.037	No results	Full match	Full match	4.42855	2.14683	2.65525e-10	1	1.19753	up
Com_10077_neg	Estrone sulfate	C18 H22 O5 S	350.121	8.65	349.114	Invalid mass	No results	No results	2.09375	1.06609	2.89505e-10	1	1.19191	up
Com_1419_neg	N-Acetyl-L-valine	C7 H13 N O3	159.09	1.503	158.083	No results	No results	Full match	1.89396	0.921408	2.95347e-10	1	1.19018	up
Com_2255_neg	Sibirioside A	C21 H28 O12	472.158	10.229	471.151	No results	No results	Full match	0.284095	-1.81555	2.95447e-10	1	1.19006	down
Com_13992_neg	Agnuside	C22 H26 O11	466.151	6.79	465.144	Invalid mass	No results	No results	10.1651	3.34555	3.30235e-10	1	1.19514	up
Com_7188_neg	Corticosterone	C21 H30 O4	382.185	9.162	381.178	Invalid mass	No results	No results	2.01345	1.00967	3.30852e-10	1	1.19591	up
Com_5720_neg	3-Hydroxyvaleric acid	C5 H10 O3	118.063	9.061	117.056	Full match	Full match	Full match	0.47069	-1.08715	3.81396e-10	1	1.18972	down
Com_2133_neg	2-Hydroxyphenylalanine	C9 H11 N O3	181.074	2.072	180.067	Full match	Full match	Full match	2.61443	1.3865	4.9077e-10	1	1.19888	up
Com_6557_neg	Gibberellin A7	C19 H22 O5	330.147	8.485	329.14	Full match	No results	No match	0.498857	-1.0033	5.81538e-10	1	1.18913	down
Com_1138_neg	尾-Estradiol-17尾-glucuronide	C24 H32 O8	448.213	11.059	447.206	Invalid mass	No results	No results	0.236516	-2.07999	5.96505e-10	1	1.1931	down
Com_2051_neg	Maltitol	C12 H24 O11	344.132	1.439	343.125	No results	Full match	Full match	2.05071	1.03612	8.2752e-10	1	1.18832	up
Com_2694_neg	Casticin	C19 H18 O8	374.1	8.745	373.093	No results	No results	Full match	0.537595	-0.895407	8.31246e-10	1	1.19482	down
Com_1094_neg	Sibiricose A5	C22 H30 O14	518.164	7.852	517.157	No results	Full match	Full match	0.581692	-0.781672	9.21407e-10	1	1.18927	down
Com_1322_neg	Ixoside	C16 H20 O11	388.101	7.791	369.083	No results	No results	Full match	0.286759	-1.80209	9.32614e-10	1	1.19663	down
Com_1837_neg	5-Phenyl-2,4-pentadienoic acid	C11 H10 O2	174.068	10.084	173.061	No results	No results	Full match	0.595342	-0.74821	9.95375e-10	1	1.18834	down
Com_20241_neg	Guanosine 5'-diphosphate	C10 H15 N5 O11 P2	443.023	1.594	442.016	No results	No results	Full match	0.298482	-1.74428	1.10697e-09	1	1.19035	down
Com_593_neg	D-(-)-Quinic acid	C7 H12 O6	192.064	1.283	191.057	Full match	Full match	Full match	2.45109	1.29343	1.15621e-09	1	1.187	up
Com_4618_neg	Prostaglandin E3	C20 H30 O5	772.368	12.952	385.177	Invalid mass	No results	No results	4.27532	2.09603	1.29664e-09	1	1.18669	up
Com_1658_neg	3'-Methoxy Puerarin	C22 H22 O10	446.122	10.072	445.114	No results	No results	Full match	0.403522	-1.30928	1.3205e-09	1	1.18668	down
Com_415_neg	Ferulic acid O-hexoside	C16 H20 O9	356.111	7.974	355.104	No results	No results	Full match	0.499385	-1.00178	1.3763e-09	1	1.19503	down
Com_757_neg	Quercetin-3尾-D-glucoside	C21 H20 O12	464.096	9.405	463.089	Full match	Full match	Full match	0.295995	-1.75635	1.79769e-09	1	1.19023	down
Com_17858_neg	20-Hydroxy prostaglandin F2伪	C20 H34 O6	812.42	10.65	405.203	Invalid mass	No results	No results	2.07191	1.05096	2.01141e-09	1	1.18582	up
Com_3557_neg	Cucurbitacin B	C32 H46 O8	558.322	14.324	557.315	No results	No results	Full match	0.444209	-1.17069	2.01197e-09	1	1.18661	down
Com_4305_neg	Verbascoside	C29 H36 O15	624.206	8.257	623.199	No results	No results	Full match	0.235063	-2.08888	2.32861e-09	1	1.19109	down
Com_10327_neg	Tanshinone IIA sulfonate	C19 H17 Na O6 S	396.063	1.337	395.055	No results	No results	Full match	5.52167	2.4651	2.44799e-09	1	1.19152	up
Com_16503_neg	Demethylzeylasteral	C29 H36 O6	480.25	13.27	479.242	No results	No results	Full match	1.78831	0.838599	2.83738e-09	1	1.18534	up
Com_1333_neg	Androsin	C15 H20 O8	328.116	7.469	327.109	No results	No results	Full match	0.535637	-0.900673	2.93255e-09	1	1.19223	down
Com_4852_neg	Maltotriitol	C18 H34 O16	506.185	1.482	505.177	No results	No results	Full match	2.2309	1.15763	3.02211e-09	1	1.1963	up
Com_1748_neg	Camelliaside A	C33 H40 O20	756.213	8.786	755.205	No results	No results	Full match	1.96245	0.972653	4.38412e-09	1	1.18966	up
Com_19174_neg	trans-Petroselinic acid	C18 H34 O2	328.262	13.595	327.254	Invalid mass	No results	No results	0.216052	-2.21055	4.99064e-09	1	1.18603	down
Com_12345_neg	Nystose	C24 H42 O21	712.223	7.995	711.216	No results	Invalid mass	No results	0.116692	-3.09922	5.06491e-09	1	1.18961	down
Com_4960_neg	3-[3-(beta-D-Glucopyranosyloxy)-2-hydroxyphenyl]propanoic acid	C15 H20 O9	344.111	6.94	343.104	Full match	No results	No results	0.561336	-0.833063	5.90903e-09	1	1.18822	down
Com_5148_neg	Arbutin	C12 H16 O7	272.09	2.655	309.039	Full match	Full match	Full match	0.378763	-1.40063	5.94901e-09	1	1.1899	down
Com_7303_neg	Myricetin 3-O-galactoside	C21 H20 O13	480.091	8.106	479.084	No results	No results	Full match	0.28539	-1.80899	6.00891e-09	1	1.19314	down
Com_62_neg	7-O-Methylmangiferin	C20 H20 O11	436.101	9.564	435.094	No results	No results	Full match	0.589355	-0.76279	6.01475e-09	1	1.19603	down
Com_11225_neg	N-benzyl-3-(4-chlorophenyl)-4,5-dihydro-5-isoxazolecarboxamide	C17 H15 Cl N2 O2	314.087	1.931	313.079	Invalid mass	No results	No results	2.38676	1.25505	6.0338e-09	1	1.18201	up
Com_20376_neg	Brazilin	C16 H14 O5	286.085	9.186	285.077	No results	Full match	Full match	0.448929	-1.15544	6.39551e-09	1	1.1816	down
Com_16485_neg	3-[3-(beta-D-Glucopyranosyloxy)-2-methoxyphenyl]propanoic acid	C16 H22 O9	358.127	6.258	357.12	Full match	No results	Full match	4.20856	2.07333	7.27545e-09	1	1.19642	up
Com_30426_neg	3'-Adenosine monophosphate (3'-AMP)	C10 H14 N5 O7 P	347.063	4.249	346.056	Full match	Full match	Full match	3.30607	1.72512	7.57124e-09	1	1.18591	up
Com_4026_neg	Ferulaldehyde	C10 H10 O3	178.063	7.766	177.056	No results	Full match	Full match	0.575554	-0.796978	7.66267e-09	1	1.18093	down
Com_21983_neg	N'1-[1-(2-hydroxyphenyl)ethylidene]-3-methoxybenzene-1-carbohydrazide	C16 H16 N2 O3	284.117	3.415	283.11	Full match	No results	No results	31.8808	4.99462	7.89689e-09	1	1.19626	up
Com_1062_neg	Polygalaxanthone 鈪?C26 H30 O15	582.16	9.694	581.152	No results	No results	Full match	1.19707e+08	-0.890535	8.19709e-09	1	1.1807	down
Com_5873_neg	Uridine 5'-monophosphate	C9 H13 N2 O9 P	324.036	1.514	323.029	No results	No results	Full match	4.52358	2.17747	8.59007e-09	1	1.18099	up
Com_476_neg	4-O-p-Coumaroylquinic acid	C16 H18 O8	338.101	9.6	337.093	No results	No results	Full match	0.558929	-0.839262	1.07774e-08	1	1.18193	down
Com_1969_neg	Carminic acid	C22 H20 O13	492.094	8.723	491.087	Invalid mass	No results	No results	127.228	6.99127	1.268e-08	1	1.18938	up
Com_3692_neg	Nitidine	C21 H18 N O4	348.125	6.681	347.118	No results	No results	Full match	68.0725	6.089	1.28007e-08	1	1.19794	up
Com_7545_neg	O-methylnaringenin C-pentoside	C21 H22 O9	418.127	9.907	417.12	No results	No results	Full match	0.192013	-2.38072	1.32794e-08	1	1.19451	down
Com_7283_neg	4-Hydroxybenzylalcohol	C7 H8 O2	124.053	6.576	123.046	Full match	No results	Full match	2.26651	1.18047	1.34095e-08	1	1.181	up
Com_33715_neg	Methylophiopogonanone A	C19 H18 O6	342.111	8.75	341.104	No results	No results	Full match	2.95827	1.56475	1.40521e-08	1	1.17874	up
Com_8956_neg	Benzyl 6-O-beta-D-glucopyranosyl-beta-D-glucopyranoside	C19 H28 O11	432.164	9.414	431.157	Full match	No results	No results	2.58279	1.36893	1.61249e-08	1	1.18228	up
Com_315_neg	Adenine	C5 H5 N5	135.055	3.851	134.048	Full match	Full match	Full match	1.82463	0.867601	1.63357e-08	1	1.19157	up
Com_43_neg	伪,伪-Trehalose	C12 H22 O11	342.116	1.49	341.109	Full match	Full match	Full match	1.63123	0.705963	1.65674e-08	1	1.19445	up
Com_3348_neg	myricetin 3-O-beta-D-galactopyranoside	C21 H20 O13	480.095	7.798	479.087	Invalid mass	No results	No results	19.2353	4.26569	1.66484e-08	1	1.19731	up
Com_1688_neg	Phenylglyoxylic acid	C8 H6 O3	150.032	9.552	149.025	No results	No results	Full match	0.596029	-0.746545	1.84629e-08	1	1.18871	down
Com_9038_neg	Wogonoside	C22 H20 O11	460.102	9.768	459.095	No results	No results	Full match	2.26151	1.17729	1.89014e-08	1	1.19217	up
Com_12293_neg	1,2-dihydrotanshinquinone	C18 H14 O3	278.095	7.433	277.087	No results	No results	Full match	0.424117	-1.23747	2.06019e-08	1	1.19004	down
Com_3937_neg	(+/-)-Cannabichromeorcin	C17 H22 O2	258.164	11.128	257.157	Invalid mass	No results	No results	0.0319683	-4.96722	2.10503e-08	1	1.19586	down
Com_13636_neg	Gly-Tyr-Ala	C14 H19 N3 O5	309.133	8.21	308.126	No results	No results	Full match	1.89129	0.919369	2.11767e-08	1	1.17734	up
Com_2660_neg	Sulfosalicylic acid	C7 H6 O6 S	217.989	1.339	262.987	No results	No results	Full match	0.541224	-0.885701	2.23384e-08	1	1.18616	down
Com_35455_neg	Pantetheine	C11 H22 N2 O4 S	278.13	6.613	277.123	No results	No results	Full match	1.96167	0.972085	2.37615e-08	1	1.18199	up
Com_2485_neg	Ethyl Coumarin-3-carboxylate	C12 H10 O4	218.058	10.083	217.051	No results	No results	Full match	0.614379	-0.7028	2.45262e-08	1	1.17697	down
Com_3979_neg	Antiarol	C9 H12 O4	184.074	7.648	183.067	No results	No results	Full match	0.654101	-0.612416	2.60315e-08	1	1.18179	down
Com_6848_neg	Astragalus polyphenols	C20 H22 O9	406.127	9.523	405.12	No results	No results	Full match	0.553565	-0.853174	2.6373e-08	1	1.17683	down
Com_2996_neg	Ascorbic acid	C6 H8 O6	176.032	7.101	175.025	Full match	No results	Full match	0.360966	-1.47006	2.84135e-08	1	1.18826	down
Com_2944_neg	Gentiopicrin	C16 H20 O9	356.112	2.862	355.104	No results	Full match	Full match	2.13835	1.0965	2.91446e-08	1	1.1907	up
Com_1639_neg	(+)-Dihydrojasmonic acid	C12 H20 O3	212.142	11.007	211.134	No results	No results	Full match	1.89559	0.922646	3.02721e-08	1	1.18302	up
Com_5679_neg	Coumarin-3-carboxylic acid	C10 H6 O4	190.027	2.495	189.02	No results	No results	Full match	0.560444	-0.835358	3.31956e-08	1	1.18419	down
Com_15071_neg	N-Acetyl-L-leucine	C8 H15 N O3	173.106	2.046	172.098	No results	No results	Full match	3.04206	1.60505	3.37724e-08	1	1.19154	up
Com_8548_neg	ethyl 3-cyano-6-methyl-2-(phenylthio)isonicotinate	C16 H14 N2 O2 S	298.073	4.197	297.065	Invalid mass	No results	No results	3.94618	1.98046	3.78025e-08	1	1.18116	up
Com_904_neg	LPC 16:0	C24 H50 N O7 P	555.355	14.987	554.347	No results	Invalid mass	No results	0.594219	-0.750933	3.92987e-08	1	1.17846	down
Com_4411_neg	Prostaglandin F3伪	C20 H32 O5	398.234	14.109	397.227	Invalid mass	No results	No results	0.495568	-1.01284	4.18764e-08	1	1.17463	down
Com_31157_neg	Neomangiferin	C25 H28 O16	584.14	9.974	583.133	No results	No results	Full match	4.63008	2.21104	4.77056e-08	1	1.1826	up
Com_2103_neg	Kinsenoside	C10 H16 O8	264.085	7.377	263.078	No results	No results	Full match	2.04217	1.0301	5.50611e-08	1	1.19076	up
Com_16903_neg	2-Methylbutyl beta-D-glucopyranoside	C11 H22 O6	296.147	5.653	295.14	Invalid mass	No results	No results	1.72034	0.782697	5.51154e-08	1	1.1721	up
Com_28687_neg	Syringetin	C17 H14 O8	346.07	7.356	345.063	No results	No results	Full match	3.18366	1.67069	5.55365e-08	1	1.17316	up
Com_8498_neg	尾-Estradiol 3,17-disulfate	C18 H24 O8 S2	432.09	9.755	431.082	Full match	No results	No results	54.873	5.77802	6.22551e-08	1	1.19658	up
Com_19769_neg	10-Formyl-THF	C20 H23 N7 O7	473.167	1.517	472.16	No results	No results	Full match	1.81177	0.857398	6.27158e-08	1	1.1841	up
Com_9008_neg	PA (18:2/18:3)	C39 H67 O8 P	694.453	15.066	693.446	No results	Invalid mass	No results	2.19272	1.13272	6.45917e-08	1	1.17157	up
Com_524_neg	Picroside I	C24 H28 O11	492.162	9.869	491.155	No results	No results	Full match	0.42264	-1.2425	6.54686e-08	1	1.17854	down
Com_27852_neg	Flavin mononucleotide (FMN)	C17 H21 N4 O9 P	456.109	7.436	455.102	Invalid mass	No results	No results	0.336737	-1.57031	6.85265e-08	1	1.1822	down
Com_3586_neg	Jasmonic acid	C12 H18 O3	210.126	9.8	209.119	Full match	No results	Full match	0.564609	-0.824676	7.45813e-08	1	1.17841	down
Com_31609_neg	Formononetin	C16 H12 O4	286.084	7.22	285.077	Invalid mass	No results	No match	0.532605	-0.908862	8.06678e-08	1	1.17788	down
Com_3115_neg	2-Aminoadipic acid	C6 H11 N O4	161.069	1.494	160.062	No results	No results	Full match	2.32007	1.21417	8.09843e-08	1	1.18799	up
Com_12205_neg	gamma-Glutamylglutamic acid	C10 H16 N2 O7	276.096	1.506	275.089	No results	No results	Full match	1.64789	0.720624	8.28055e-08	1	1.16948	up
Com_9423_neg	Berbamine	C37 H40 N2 O6	608.29	11.124	607.282	No results	No results	Full match	0.315077	-1.66622	1.13607e-07	1	1.17938	down
Com_490_neg	Purpurin	C14 H8 O5	256.037	8.866	255.03	No results	Full match	Full match	0.54811	-0.867464	1.21967e-07	1	1.19363	down
Com_29936_neg	Cyclic AMP	C10 H12 N5 O6 P	329.053	5.997	328.046	No results	No results	Full match	8.79384	3.13649	1.28637e-07	1	1.19527	up
Com_28065_neg	LysoPC 16:1	C24 H48 N O7 P	493.318	15.071	492.31	No results	No results	Full match	0.468288	-1.09453	1.32643e-07	1	1.16682	down
Com_478_neg	7-Methoxy-4-methylcoumarin	C11 H10 O3	190.063	10.358	189.056	No results	No results	Full match	0.47713	-1.06754	1.40801e-07	1	1.19487	down
Com_17167_neg	13,14-Dihydro-15-keto prostaglandin F2伪	C20 H34 O5	390.217	12.298	389.21	Invalid mass	No results	No results	0.261934	-1.93273	1.47455e-07	1	1.16869	down
Com_3378_neg	Tenuifoliside B	C30 H36 O17	668.197	9.194	667.19	No results	No results	Full match	0.592037	-0.756241	1.49103e-07	1	1.17382	down
Com_25967_neg	11(Z)-Eicosenoic acid	C20 H38 O2	356.293	14.151	355.286	Invalid mass	No results	No match	0.118463	-3.0775	1.50582e-07	1	1.18141	down
Com_9464_neg	Oleuropein	C25 H32 O13	540.186	10.796	539.179	No results	No results	Full match	0.513507	-0.961545	1.58254e-07	1	1.18965	down
Com_2937_neg	Diosbulbin B	C19 H20 O6	344.126	8.265	343.119	No results	No results	Full match	0.318471	-1.65076	1.59063e-07	1	1.16701	down
Com_16152_neg	GlcADG (18:1-18:3)	C45 H76 O11	792.541	14.428	791.533	No results	Full match	No results	0.240713	-2.05462	1.70209e-07	1	1.19055	down
Com_7443_neg	Ziyuglycoside II	C35 H56 O8	604.398	14.599	603.39	No results	No results	Full match	0.535429	-0.901234	1.73501e-07	1	1.17219	down
Com_606_neg	Citraconic acid	C5 H6 O4	130.027	1.509	129.02	Full match	No results	Full match	1.51466	0.59899	1.7712e-07	1	1.16631	up
Com_15282_neg	LPI 19:1	C28 H53 O12 P	612.329	14.708	611.321	No results	Full match	No results	0.308006	-1.69897	1.90566e-07	1	1.16719	down
Com_13153_neg	Bornyl acetate	C12 H20 O2	196.147	11.282	195.139	No results	No results	Full match	0.285664	-1.80761	2.04171e-07	1	1.18104	down
Com_9380_neg	Methyl linolenate	C19 H32 O2	292.241	14.448	291.233	No results	No results	Full match	0.357874	-1.48248	2.07609e-07	1	1.17872	down
Com_34_neg	Citric acid	C6 H8 O7	192.027	1.175	191.02	Full match	Full match	Full match	2.99709	1.58356	2.08512e-07	1	1.18812	up
Com_7199_neg	7-Hydroxycoumarin	C9 H6 O3	162.032	10.086	161.025	No results	Full match	Full match	0.665264	-0.588002	2.12646e-07	1	1.16295	down
Com_28383_neg	Lysopc 14:0	C22 H46 N O7 P	467.303	14.665	466.295	No results	No results	Full match	0.311416	-1.68308	2.13826e-07	1	1.16615	down
Com_21416_neg	Glucosamine	C6 H13 N O5	179.079	1.389	178.072	No results	No results	Full match	2.87975	1.52595	2.20032e-07	1	1.16675	up
Com_16160_neg	N-(2-chloro-6-methylphenyl)-N'-(1,2-diphenylethyl)thiourea	C22 H21 Cl N2 S	380.114	9.962	379.107	Invalid mass	No results	No results	0.510852	-0.969024	2.30504e-07	1	1.16262	down
Com_15586_neg	8-O-Acetylharpagide	C17 H26 O11	406.149	6.285	405.142	No results	Full match	Full match	0.619666	-0.690438	2.35057e-07	1	1.16221	down
Com_4868_neg	R-Aminobutyrate	C4 H9 N O2	103.064	1.38	102.056	No results	No results	Full match	1.84159	0.880949	2.57952e-07	1	1.16216	up
Com_10832_neg	Neohesperidin dihydrochalcone	C28 H36 O15	612.206	8.045	611.199	No results	No results	Full match	0.626357	-0.674942	2.69602e-07	1	1.16291	down
Com_4535_neg	Rhapontigenin 3'-O-glucoside	C21 H24 O9	420.143	9.702	419.135	No results	No results	Full match	0.601945	-0.732295	2.90323e-07	1	1.18309	down
Com_19978_neg	Lignoceric Acid	C24 H48 O2	368.366	15.394	367.359	Full match	No results	No results	1.56929	0.650108	2.91109e-07	1	1.16042	up
Com_5535_neg	2-(Dimethylamino)Guanosine	C12 H17 N5 O5	311.124	7.7	310.117	No results	No results	Full match	2.58318	1.36915	3.31646e-07	1	1.17983	up
Com_2116_neg	LysoPC 15:0	C23 H48 N O7 P	481.317	14.985	480.31	No results	No results	Full match	0.590854	-0.759126	3.55746e-07	1	1.17038	down
Com_21793_neg	Docosanoic Acid	C22 H44 O2	340.335	16.633	339.327	Full match	No results	Full match	1.71239	0.776011	4.2433e-07	1	1.15869	up
Com_2693_neg	LPI 16:0	C25 H49 O12 P	572.297	14.527	571.29	No results	Full match	No match	0.548647	-0.866049	4.2984e-07	1	1.18176	down
Com_11027_neg	Azelaic acid	C9 H16 O4	188.105	4.118	187.098	Full match	No results	Full match	1.55003	0.632297	4.46133e-07	1	1.15899	up
Com_10658_neg	C-hexosyl-luteolin O-feruloylhexoside	C37 H38 O19	786.203	10.545	785.196	No results	No results	Full match	9.32051	3.22041	4.46788e-07	1	1.19347	up
Com_4478_neg	DL-尾-Leucine	C6 H13 N O2	131.095	2.313	130.088	Full match	No results	Full match	1.67623	0.745217	5.65477e-07	1	1.17575	up
Com_13110_neg	Steviolbioside	C32 H50 O13	642.327	12.275	641.319	No results	No results	Full match	6.04908	2.59672	5.80102e-07	1	1.18627	up
Com_10979_neg	LPI 17:0	C26 H51 O12 P	586.313	14.701	585.306	No results	Full match	No results	0.297052	-1.75121	5.85948e-07	1	1.17111	down
Com_12178_neg	Phloretin	C15 H14 O5	274.085	10.361	319.083	No results	No results	Full match	0.44424	-1.17059	6.13713e-07	1	1.17427	down
Com_4150_neg	2,3-Dinor prostaglandin E1	C18 H30 O5	308.199	12.362	307.192	Invalid mass	No results	No results	5.28668	2.40236	6.24976e-07	1	1.18997	up
Com_13126_neg	Sibiricose A6	C23 H32 O15	548.175	6.435	547.168	No results	No results	Full match	3.94866	1.98136	6.68223e-07	1	1.19079	up
Com_8431_neg	4,5-DCQA Isochlorogenic acid C	C25 H24 O12	516.125	8.114	515.118	No results	No results	Full match	1.52122	0.605225	6.69864e-07	1	1.15354	up
Com_21924_neg	(-)-Menthol	C10 H20 O	156.152	13.958	155.145	No results	No results	Full match	0.281253	-1.83006	6.78976e-07	1	1.17318	down
Com_3316_neg	Ethyl-尾-D-glucuronide	C8 H14 O7	222.074	10.309	221.067	Full match	No results	No results	0.510873	-0.968964	6.90732e-07	1	1.16726	down
Com_3482_neg	LPE 18:3	C23 H42 N O7 P	475.271	14.272	474.263	No results	Full match	No results	0.659203	-0.601206	7.08754e-07	1	1.16097	down
Com_29914_neg	Ellagic acid	C14 H6 O8	302.007	1.464	301	No results	No results	Full match	0.226507	-2.14237	7.96601e-07	1	1.15237	down
Com_1472_neg	Succinic acid	C4 H6 O4	118.027	1.251	117.02	No results	Full match	Full match	2.20104	1.13818	8.0989e-07	1	1.17704	up
Com_1856_neg	Plantamajoside	C29 H36 O16	640.202	8.089	639.194	No results	No results	Full match	0.455427	-1.13471	8.37665e-07	1	1.17292	down
Com_608_neg	Dehydroascorbic acid	C6 H6 O6	174.017	1.511	173.01	No results	Full match	Full match	1.73322	0.793458	8.70317e-07	1	1.18471	up
Com_3718_neg	Glycerophospho-N-palmitoyl ethanolamine	C21 H44 N O7 P	453.286	14.895	452.279	Full match	Full match	Full match	0.571486	-0.80721	8.74948e-07	1	1.18177	down
Com_7167_neg	LPC(1-acyl 16:0)	C24 H50 N O7 P	495.333	14.987	494.326	No results	No results	Full match	0.517392	-0.95067	9.04529e-07	1	1.16858	down
Com_3013_neg	LPI 18:3	C27 H47 O12 P	594.282	13.931	593.274	No results	Full match	No results	0.570225	-0.810398	9.06522e-07	1	1.15435	down
Com_1237_neg	Isomaltose	C12 H22 O11	342.115	9.052	341.108	No results	No results	Full match	142.636	7.1562	9.4657e-07	1	1.19198	up
Com_11646_neg	Quercetin-O-glucoside	C21 H20 O12	464.096	7.876	463.089	No results	No results	Full match	0.649366	-0.622895	1.00692e-06	1	1.15259	down
Com_16270_neg	Cyanidin O-rutinoside	C27 H31 O15	595.164	8.865	594.157	No results	No results	Full match	7.7973	2.96297	1.0542e-06	1	1.17753	up
Com_609_neg	Guanosine 3',5'-Cyclic Monophosphate	C10 H12 N5 O7 P	345.046	1.902	344.039	No results	No results	Full match	0.0778925	-3.68237	1.34408e-06	1	1.19043	down
Com_10617_neg	Sauchinone	C20 H20 O6	356.126	8.327	355.118	No results	No results	Full match	0.317903	-1.65334	1.39733e-06	1	1.1824	down
Com_18486_neg	delta-Hexanolactone	C6 H10 O2	114.068	7.451	113.061	No results	No results	Full match	2.31073	1.20835	1.43291e-06	1	1.15761	up
Com_11349_neg	Myricitrin	C21 H20 O12	232.048	7.884	231.041	No results	Invalid mass	No results	0.640169	-0.643475	1.47881e-06	1	1.14581	down
Com_3092_neg	5-amino-1-(4-chlorobenzyl)-1H-1,2,3-triazole-4-carboxamide	C10 H10 Cl N5 O	252.064	9.535	251.056	Invalid mass	No results	No results	0.542807	-0.881488	1.53484e-06	1	1.1446	down
Com_785_neg	Gibberellic acid	C19 H22 O6	346.142	8.282	391.14	No results	No results	Full match	0.315182	-1.66574	1.54603e-06	1	1.18146	down
Com_31169_neg	3-methyl-5-oxo-5-(4-toluidino)pentanoic acid	C13 H17 N O3	470.237	5.967	469.229	Invalid mass	No results	No results	1.76917	0.823073	1.56275e-06	1	1.14664	up
Com_8829_neg	Estriol 17-sulfate	C18 H24 O6 S	368.132	3.295	367.125	Invalid mass	No results	No results	1.77123	0.824749	1.64704e-06	1	1.15784	up
Com_3949_neg	2-Ethylbutyric Acid	C6 H12 O2	116.084	8.117	115.077	No results	No results	Full match	0.619049	-0.691874	1.6622e-06	1	1.15043	down
Com_12968_neg	LPG 17:1	C23 H45 O9 P	496.281	14.481	495.274	No results	Full match	No results	0.475962	-1.07108	1.70379e-06	1	1.16767	down
Com_2004_neg	LPE 18:2	C23 H44 N O7 P	477.286	14.572	476.279	No results	Full match	Full match	0.550851	-0.860266	1.71458e-06	1	1.17944	down
Com_9623_neg	R-Notoginsenoside R2	C41 H70 O13	770.478	15.144	769.471	No results	No results	Full match	0.634197	-0.656998	1.77621e-06	1	1.15564	down
Com_4566_neg	Gracillin	C45 H72 O17	884.479	14.444	883.472	No results	No results	Full match	2.65842	1.41057	1.82738e-06	1	1.18496	up
Com_16352_neg	N-Coumaroyltyramine	C17 H17 N O3	283.121	9.638	282.114	No results	No results	Full match	2.61853	1.38876	1.89489e-06	1	1.16145	up
Com_3518_neg	2-Ketoadipic acid	C6 H8 O5	160.038	1.43	159.03	No results	Full match	Full match	2.1303	1.09106	2.04274e-06	1	1.17887	up
Com_34417_neg	Rebaudioside C	C44 H70 O22	950.436	8.581	949.429	No results	No results	Full match	0.325772	-1.61807	2.05171e-06	1	1.14445	down
Com_1025_neg	8-O-acetyl shanzhiside methyl ester	C19 H28 O12	448.159	7.648	447.151	No results	No results	Full match	0.618374	-0.693447	2.15525e-06	1	1.15356	down
Com_27117_neg	Lysopa 18:0	C21 H43 O7 P	438.276	14.8	437.268	No results	No results	Full match	2.72344	1.44543	2.18455e-06	1	1.17871	up
Com_4834_neg	Caffeic acid	C9 H8 O4	180.043	2.4	179.035	Full match	Full match	Full match	0.592674	-0.754689	2.25488e-06	1	1.16787	down
Com_10296_neg	Luteolin	C15 H10 O6	286.048	8.829	285.041	Full match	Full match	Full match	0.449311	-1.15421	2.29286e-06	1	1.15895	down
Com_17362_neg	Leonurine	C14 H21 N3 O5	311.149	9.942	310.142	No results	No results	Full match	1.56175	0.643168	2.36761e-06	1	1.15254	up
Com_10969_neg	Epimedin C	C39 H50 O19	822.297	8.137	821.289	No results	No results	Full match	0.382506	-1.38645	2.3803e-06	1	1.13969	down
Com_24496_neg	Tricin 4'-O-(syringyl alcohol) ether O-hexoside	C32 H34 O15	658.192	9.498	657.185	No results	No results	Full match	0.502118	-0.993902	2.39351e-06	1	1.14848	down
Com_516_neg	2-Furoic acid	C5 H4 O3	112.016	1.171	111.009	Full match	Full match	Full match	3.04852	1.60811	2.44898e-06	1	1.17844	up
Com_1464_neg	Polyphyllin VI	C39 H62 O13	738.419	13.508	737.412	No results	No results	Full match	2.05786	1.04114	2.4678e-06	1	1.14031	up
Com_10933_neg	Elaidic acid	C18 H34 O2	282.256	14.741	281.249	Full match	No results	Full match	5.22036	2.38415	2.48711e-06	1	1.18678	up
Com_376_neg	Denin	C33 H56 O14	676.368	14.126	675.361	No results	No results	Full match	0.484985	-1.04399	2.83347e-06	1	1.18379	down
Com_1307_neg	Vanillactic acid	C10 H12 O5	212.069	8.285	211.062	No results	No results	Full match	53.1143	5.73103	2.98039e-06	1	1.18868	up
Com_21342_neg	Epimedin B	C38 H48 O19	808.277	8.505	807.27	No results	No results	Full match	0.366537	-1.44797	3.07043e-06	1	1.16612	down
Com_25984_neg	LPA 18:0	C21 H43 O7 P	438.275	15.539	437.268	No results	Full match	Full match	0.483127	-1.04953	3.16045e-06	1	1.13592	down
Com_786_neg	Polygalaxanthone 鈪?C23 H26 O12	494.143	9.469	475.125	No results	No results	Full match	1.52454e+08	-1.06319	3.19055e-06	1	1.17168	down
Com_2661_neg	L-Glutamic acid	C5 H9 N O4	147.054	1.262	146.046	Full match	Full match	Full match	1.74507	0.803283	3.2055e-06	1	1.17637	up
Com_14278_neg	8-Hydroxyguanosine	C10 H13 N5 O6	299.086	1.893	298.079	No results	No results	Full match	0.442671	-1.17569	3.50631e-06	1	1.15398	down
Com_801_neg	3-Hydroxy-3-methylglutaric acid	C6 H10 O5	162.053	1.37	161.046	Full match	No results	Full match	1.72181	0.783928	3.5691e-06	1	1.14643	up
Com_15575_neg	LPC 17:1	C25 H50 N O7 P	567.354	14.674	566.347	No results	Invalid mass	No results	0.339257	-1.55955	3.76914e-06	1	1.15081	down
Com_3400_neg	Tartaric acid	C4 H6 O6	150.017	1.232	149.009	No results	No results	Full match	3.74588	1.90531	3.77753e-06	1	1.16467	up
Com_1830_neg	LPI 18:2	C27 H49 O12 P	596.297	14.227	595.29	No results	Full match	No results	0.562192	-0.830864	3.82443e-06	1	1.1373	down
Com_4583_neg	S-Lactoyglutathione	C13 H21 N3 O8 S	379.104	10.174	378.096	No results	No results	Full match	0.414585	-1.27026	3.88377e-06	1	1.16278	down
Com_3793_neg	Vanillyl alcohol	C8 H10 O3	154.063	6.574	153.056	Full match	Full match	Full match	2.12616	1.08825	3.93344e-06	1	1.18257	up
Com_10809_neg	Santacruzamate A	C15 H22 N2 O3	278.163	9.645	277.156	No results	No results	Full match	1.53204	0.615458	4.04576e-06	1	1.16233	up
Com_2435_neg	Trachelogenin	C21 H24 O7	388.153	8.81	387.146	No results	No results	Full match	3.04478	1.60634	4.08617e-06	1	1.17572	up
Com_29512_neg	5-(3,4-dihydroxybenzylidene)hexahydropyrimidine-2,4,6-trione	C11 H8 N2 O5	248.047	3.224	247.04	Invalid mass	No results	No results	0.634817	-0.655588	4.29559e-06	1	1.14383	down
Com_2428_neg	Eriodictyol O-malonylhexoside	C24 H24 O14	536.119	8.79	535.112	No results	No results	Full match	0.286828	-1.80174	4.31403e-06	1	1.18515	down
Com_6897_neg	Angoroside C	C36 H48 O19	784.281	8.389	783.274	No results	No results	Full match	22.3138	4.47987	4.51141e-06	1	1.18161	up
Com_38668_neg	Nicotinuric Acid	C8 H8 N2 O3	180.053	6.561	405.103	No results	No results	Full match	2.25797	1.17503	4.68719e-06	1	1.14522	up
Com_6124_neg	Pseudoginsenoside-RT5	C36 H62 O10	654.437	15.076	653.429	No results	No results	Full match	1.68614	0.75372	5.34138e-06	1	1.14533	up
Com_3726_neg	Tubuloside A	C37 H48 O21	828.271	8.39	827.264	No results	No results	Full match	39.5393	5.30521	6.10312e-06	1	1.18447	up
Com_5490_neg	7-(2-Hydroxyethyl)theophyline	C9 H12 N4 O3	224.09	1.505	223.083	No results	No results	Full match	1.71749	0.780303	6.19125e-06	1	1.15556	up
Com_986_neg	Kaji-ichigoside F1	C36 H58 O10	650.404	12.47	649.397	No results	No results	Full match	2.34225	1.2279	6.29892e-06	1	1.17298	up
Com_21751_neg	Lawsone	C10 H6 O3	174.032	7.168	173.025	No results	No results	Full match	1.54224	0.625025	6.33661e-06	1	1.12594	up
Com_34897_neg	Argininosuccinic acid	C10 H18 N4 O6	122.06	10.293	289.119	Invalid mass	No results	No results	2.53888	1.34419	6.54036e-06	1	1.17703	up
Com_12053_neg	3-Hydroxyhippuric Acid	C9 H9 N O4	195.054	9.758	194.046	No results	No results	Full match	0.625951	-0.675878	7.23949e-06	1	1.15054	down
Com_5081_neg	LPG 18:2	C24 H45 O9 P	508.281	14.279	507.273	No results	Full match	No results	1.55544	0.63732	7.5601e-06	1	1.12457	up
Com_25495_neg	Alisol B 23-acetate	C32 H50 O5	514.366	13.184	513.359	No results	No results	Full match	2.28526	1.19236	8.10087e-06	1	1.12479	up
Com_33201_neg	ethyl 3-[(4-chlorophenethyl)amino]-2-cyanoacrylate	C14 H15 Cl N2 O2	278.083	5.858	277.076	Full match	No results	No results	1.99876	0.999107	8.29404e-06	1	1.12257	up
Com_28096_neg	Cinnamoyl tyramine	C17 H17 N O2	267.126	11.183	266.119	No results	No results	Full match	2.60507	1.38132	9.31942e-06	1	1.17357	up
Com_149_neg	Sucrose	C12 H22 O11	402.138	1.49	401.13	No results	Invalid mass	No results	1.85021	0.887686	9.52731e-06	1	1.17985	up
Com_11725_neg	5-Aminolevulinic acid	C5 H9 N O3	131.059	1.248	130.051	No results	No results	Full match	1.96682	0.975868	1.05087e-05	1	1.11794	up
Com_8745_neg	LPC 18:0	C26 H54 N O7 P	583.386	15.534	582.379	No results	Invalid mass	No results	0.537766	-0.894949	1.06257e-05	1	1.12052	down
Com_402_neg	4-Hydroxybenzaldehyde	C7 H6 O2	122.037	8.183	121.03	Full match	Full match	Full match	1.66888	0.738881	1.08098e-05	1	1.17871	up
Com_20973_neg	OxPG (18:0-18:2+2O)	C42 H79 O12 P	806.52	14.678	805.513	No results	Invalid mass	No results	2.36421	1.24136	1.08336e-05	1	1.16647	up
Com_1593_neg	Albiflorin	C23 H28 O11	480.164	9.85	479.156	No results	No results	Full match	0.527034	-0.924032	1.13263e-05	1	1.11989	down
Com_12715_neg	5,5-Dimethylhydantoin	C5 H8 N2 O2	128.059	1.379	127.052	Full match	No results	Full match	1.65035	0.722775	1.17518e-05	1	1.11915	up
Com_2087_neg	Acetylharpagide	C17 H26 O11	406.148	7.648	405.141	No results	No results	Full match	0.632618	-0.660594	1.20151e-05	1	1.11595	down
Com_6265_neg	Galacturonic acid	C6 H10 O7	388.087	6.823	193.036	Invalid mass	No results	No results	21.0026	4.39249	1.30189e-05	1	1.15914	up
Com_16378_neg	20-Hydroxy-(5Z,8Z,11Z,14Z)-eicosatetraenoic acid	C20 H32 O3	274.23	14.446	273.223	Invalid mass	No results	No results	0.286134	-1.80524	1.40676e-05	1	1.16448	down
Com_17715_neg	Lysopc 17:0	C25 H52 N O7 P	509.349	15.538	508.341	No results	No results	Full match	0.46336	-1.10979	1.4363e-05	1	1.11513	down
Com_35442_neg	LPG 18:4	C24 H41 O9 P	504.25	13.84	503.243	No results	Full match	No results	2.0819	1.0579	1.52498e-05	1	1.15734	up
Com_15470_neg	Kaempferol-3-Galactoside-6''-Rhamnoside-3'''-Rhamnoside	C33 H40 O19	740.217	8.279	739.21	Full match	No results	Full match	2.41467	1.27183	1.5557e-05	1	1.13372	up
Com_24857_neg	N6-Succinyl Adenosine	C14 H17 N5 O8	383.108	1.496	382.1	No results	No results	Full match	4.07072	2.02528	1.6082e-05	1	1.13901	up
Com_15685_neg	Nodakenin	C20 H24 O9	408.142	6.59	407.135	No results	No results	Full match	0.458364	-1.12543	1.63194e-05	1	1.11914	down
Com_20745_neg	MGDG (2:0/18:3)	C29 H48 O10	602.33	14.318	601.323	No results	Invalid mass	No results	0.542782	-0.881555	1.65825e-05	1	1.15062	down
Com_37952_neg	Ginsenoside-Ro	C48 H76 O19	956.501	14.541	955.493	No results	No results	Full match	2.00905	1.00651	1.74083e-05	1	1.12119	up
Com_14321_neg	LPA 16:0	C19 H39 O7 P	410.243	14.638	409.235	No results	Full match	Full match	4.00399	2.00144	1.78695e-05	1	1.15883	up
Com_15230_neg	2-(acetylamino)-3-[4-(acetylamino)phenyl]acrylic acid	C13 H14 N2 O4	262.096	2.259	261.088	Full match	No results	No results	2.2051	1.14085	1.83133e-05	1	1.17034	up
Com_718_neg	Naringin Dihydrochalcone	C27 H34 O14	582.196	8.332	581.189	No results	No results	Full match	0.294907	-1.76167	1.84108e-05	1	1.16478	down
Com_6178_neg	Propylparaben	C10 H12 O3	180.079	8.476	179.072	No results	No results	Full match	0.662315	-0.594412	1.90802e-05	1	1.1286	down
Com_4559_neg	D-Galacturonic acid	C6 H10 O7	194.043	1.238	193.035	No results	No results	Full match	1.73116	0.791738	1.99118e-05	1	1.10874	up
Com_8782_neg	Tenuifoliside A	C31 H38 O17	682.212	10.069	681.204	No results	No results	Full match	0.331366	-1.5935	2.06896e-05	1	1.15059	down
Com_18434_neg	FAHFA (2:0/18:1)	C20 H36 O4	340.262	13.122	339.254	No results	Full match	No results	1.7591	0.814842	2.16791e-05	1	1.10542	up
Com_31323_neg	Vincamine	C21 H26 N2 O3	354.193	13.864	353.187	No results	No results	Full match	2.13576	1.09475	2.38443e-05	1	1.15482	up
Com_15938_neg	(+)-Bicuculline	C20 H17 N O6	367.106	10.227	366.099	No results	No results	Full match	0.380713	-1.39322	2.40191e-05	1	1.12984	down
Com_5428_neg	3,6'-Disinapoyl sucrose	C34 H42 O19	754.234	9.005	753.227	No results	No results	Full match	47.2062	5.5609	2.74558e-05	1	1.17233	up
Com_28554_neg	Thymine	C5 H6 N2 O2	126.043	12.301	125.036	No results	No results	Full match	0.532133	-0.910141	2.87839e-05	1	1.1181	down
Com_11257_neg	Prostaglandin A3	C20 H28 O4	664.397	14.865	663.389	Invalid mass	No results	No results	4.63528	2.21266	3.08618e-05	1	1.13246	up
Com_24011_neg	13,14-Dihydro-19(R)-hydroxy prostaglandin E1	C20 H36 O6	372.251	10.463	371.244	Full match	No results	No results	0.439105	-1.18736	3.24337e-05	1	1.14095	down
Com_10159_neg	trans-3,5-Dimethoxy-4-hydroxycinnamaldehyde	C11 H12 O4	208.074	10.875	207.067	No results	No results	Full match	1.78788	0.838253	3.29241e-05	1	1.11191	up
Com_10473_neg	Pomolic acid beta-D-glucopyranosyl ester	C36 H58 O9	634.405	12.48	633.398	No results	No results	Full match	0.393102	-1.34703	3.30103e-05	1	1.12155	down
Com_19097_neg	Muramic acid	C9 H17 N O7	251.101	1.365	250.094	No results	No results	Full match	1.53857	0.621591	3.36388e-05	1	1.09722	up
Com_559_neg	N-[5-(trifluoromethyl)-2-pyridinyl]benzenesulfonamide	C12 H9 F3 N2 O2 S	302.034	1.949	301.027	Full match	No results	No results	0.126659	-2.98098	3.56161e-05	1	1.1665	down
Com_8629_neg	Stevioside	C38 H60 O18	804.381	11.382	803.374	No results	No results	Full match	0.128738	-2.95749	3.60428e-05	1	1.11791	down
Com_13738_neg	3-N-butyl-4,5-dihydrophthalide	C12 H16 O2	192.115	11.255	191.108	No results	No results	Full match	0.52009	-0.943168	3.64457e-05	1	1.13285	down
Com_30395_neg	alpha-Hederin	C41 H66 O12	750.456	13.466	749.448	No results	No results	Full match	0.438742	-1.18856	4.01509e-05	1	1.13516	down
Com_5410_neg	Fraxinol	C11 H10 O5	222.053	7.882	221.046	No results	Full match	Full match	0.662235	-0.594584	4.03552e-05	1	1.12804	down
Com_8825_neg	LPA 18:2	C21 H39 O7 P	434.244	14.622	433.237	No results	Full match	No results	0.566911	-0.818805	4.17913e-05	1	1.11092	down
Com_6132_neg	Scopolin	C16 H18 O9	354.095	10.085	353.088	No results	No results	Full match	0.6179	-0.694555	4.56979e-05	1	1.09457	down
Com_21399_neg	Butanedioicacid	C28 H36 O10	532.231	10.882	531.223	No results	No results	Full match	0.17629	-2.50397	4.72861e-05	1	1.1466	down
Com_9570_neg	Oxidized glutathione	C20 H32 N6 O12 S2	612.153	1.277	305.069	No results	No results	Full match	1.74533	0.803503	5.01095e-05	1	1.11466	up
Com_3769_neg	LPI 18:1	C27 H51 O12 P	598.313	14.536	597.306	No results	Full match	No results	0.596066	-0.746457	5.1912e-05	1	1.13618	down
Com_2738_neg	(2S)-4-Oxo-2-phenyl-3,4-dihydro-2H-chromen-7-yl beta-D-glucopyranoside	C21 H22 O8	448.138	9.576	447.131	Invalid mass	No results	No match	0.397759	-1.33003	5.20173e-05	1	1.12399	down
Com_586_neg	Rutin	C27 H30 O16	610.154	9.333	609.147	Full match	Full match	Full match	0.50469	-0.986531	5.2834e-05	1	1.15235	down
Com_22440_neg	Kaempferol-3-gentiobioside	C27 H30 O16	610.154	10.01	304.07	No results	No results	Full match	0.455449	-1.13464	5.49235e-05	1	1.1132	down
Com_19788_neg	Arabidopyl ketoadipic acid	C15 H14 O9	338.062	6.093	337.055	No results	No results	Full match	2.10196	1.07174	6.07229e-05	1	1.11105	up
Com_3730_neg	L-Histidine	C6 H9 N3 O2	155.07	1.44	154.063	Full match	Full match	Full match	1.99634	0.997361	6.3832e-05	1	1.11751	up
Com_27487_neg	S-Adenosyl-methionine	C22 H30 N6 O8 S2	570.159	9.151	569.152	No results	No results	Full match	5.63155	2.49353	6.63098e-05	1	1.10503	up
Com_20469_neg	N1,N10-Dicoumaroyl spermidine	C25 H31 N3 O4	437.23	9.698	919.459	No results	No results	Full match	0.455	-1.13606	6.81778e-05	1	1.08148	down
Com_9584_neg	Miyabenol C	C42 H32 O9	680.204	1.492	339.095	No results	No results	Full match	1.84069	0.88025	7.27211e-05	1	1.10998	up
Com_7224_neg	N-Oleoyl Glycine	C20 H37 N O3	339.278	14.912	338.271	No results	No results	Full match	0.60358	-0.728384	7.4917e-05	1	1.14416	down
Com_1754_neg	Lipoic acid	C8 H14 O2 S2	206.043	1.215	205.036	Full match	No results	Full match	3.40991	1.76973	8.38796e-05	1	1.07591	up
Com_8221_neg	LPC 17:0	C25 H52 N O7 P	569.37	15.186	568.363	No results	Invalid mass	No results	0.555463	-0.848238	8.85551e-05	1	1.09689	down
Com_8575_neg	LPC 19:1	C27 H54 N O7 P	595.386	15.16	594.379	No results	Invalid mass	No results	0.497548	-1.00709	9.12748e-05	1	1.14052	down
Com_26768_neg	Palatinose	C12 H22 O11	342.115	2.785	341.107	No results	Full match	Full match	2.03743	1.02675	9.45485e-05	1	1.12775	up
Com_25303_neg	Geniposidic acid	C16 H22 O10	374.122	4.13	373.115	Full match	No results	Full match	2.90746	1.53976	9.81785e-05	1	1.13606	up
Com_34313_neg	LysoPC 16:2	C24 H46 N O7 P	491.302	14.97	490.295	No results	No results	Full match	0.520487	-0.942067	0.000102113	1	1.10124	down
Com_19899_neg	Lycoperodine	C12 H12 N2 O2	216.09	6.925	215.083	No results	No results	Full match	0.649173	-0.623325	0.000108309	1	1.10067	down
Com_1202_neg	Homovanillic acid	C9 H10 O4	182.058	8.412	181.051	Full match	Full match	Full match	26.976	4.7536	0.000109057	1	1.14799	up
Com_25947_neg	5-[(Benzoyloxy)methyl]-4,5,6-trihydroxy-2-cyclohexen-1-yl benzoate	C21 H20 O7	430.128	10.191	429.12	Invalid mass	No results	No match	0.493413	-1.01913	0.000122984	1	1.06592	down
Com_4732_neg	Salvianolic acid A	C26 H22 O10	494.123	9.547	493.116	No results	No results	Full match	0.549268	-0.864418	0.000129019	1	1.06363	down
Com_5388_neg	Oleoyl-L-伪-lysophosphatidic acid	C21 H41 O7 P	436.26	14.975	435.252	Full match	Full match	No results	0.560962	-0.834024	0.0001307	1	1.12192	down
Com_15842_neg	di-C,C-pentosyl-luteolin	C25 H26 O14	550.134	9.2	549.127	No results	No results	Full match	0.410525	-1.28446	0.000134959	1	1.06505	down
Com_38038_neg	Ganoderiol A	C30 H46 O2	438.35	13.591	437.343	No results	No results	Full match	1.98924	0.992219	0.000137793	1	1.07369	up
Com_2158_neg	Thioctic acid	C8 H14 O2 S2	206.043	1.514	205.036	No results	No results	Full match	1.80995	0.855949	0.000141178	1	1.12388	up
Com_18433_neg	Protostemonine	C25 H31 N O6	441.213	11.082	440.206	No results	No results	Full match	0.378022	-1.40346	0.00017134	1	1.0542	down
Com_28288_neg	Desthiobiotin	C10 H18 N2 O3	214.132	2.971	213.125	No results	No results	Full match	1.82708	0.869537	0.000181313	1	1.10175	up
Com_3915_neg	5-O-p-Coumaroyl shikimic acid	C16 H16 O7	320.09	10.085	319.082	No results	No results	Full match	0.650225	-0.620988	0.000193524	1	1.0599	down
Com_10820_neg	Polygalaxanthone 鈪?C27 H32 O16	612.17	7.899	611.163	No results	No results	Full match	2.11779e+07	0.691507	0.000193598	1	1.11723	up
Com_16839_neg	Protosappanin B	C16 H16 O6	304.096	8.335	607.184	No results	No results	Full match	0.3347	-1.57906	0.000198893	1	1.13088	down
Com_18652_neg	3,4-dimethoxy-N-[3-(1,3,4-oxadiazol-2-yl)phenyl]benzenesulfonamide	C16 H15 N3 O5 S	361.079	6.34	360.072	Invalid mass	No results	No results	2.9757	1.57323	0.000199369	1	1.12625	up
Com_6697_neg	LPC(1-acyl 18:1)	C26 H52 N O7 P	521.35	14.968	520.341	No results	No results	Full match	0.399476	-1.32382	0.000222358	1	1.09951	down
Com_2001_neg	Lanatoside C	C49 H76 O20	984.495	12.293	491.24	No results	No results	Full match	0.412247	-1.27842	0.000287413	1	1.12936	down
Com_1391_neg	Sodium Houttuyfonate	C14 H27 Na O5 S	330.147	9.012	329.14	No results	No results	Full match	0.4229	-1.24161	0.000304026	1	1.12891	down
Com_21042_neg	N-Caffeoylagmatine	C14 H20 N4 O3	292.153	8.504	291.145	No results	No results	Full match	5.4044	2.43413	0.000378919	1	1.11497	up
Com_1498_neg	LPG 16:0	C22 H45 O9 P	484.281	14.454	483.273	No results	Full match	No results	2.48703	1.31443	0.000390408	1	1.12021	up
Com_8568_neg	19(R)-Hydroxy prostaglandin A2	C20 H30 O5	772.368	12.295	385.177	Invalid mass	No results	No results	1.94697	0.961229	0.00040246	1	1.11385	up
Com_5894_neg	Jionoside A1	C36 H48 O20	800.276	9.798	799.269	No results	No results	Full match	1.56244	0.643798	0.000422737	1	1.08351	up
Com_27792_neg	Quercetin 3-O-尾-D-Glucuronide	C21 H18 O13	478.078	7.048	477.071	No results	Invalid mass	No results	0.625582	-0.67673	0.000438485	1	1.04537	down
Com_10235_neg	Sebacic acid	C10 H18 O4	202.121	10.881	201.113	No results	No results	Full match	0.657789	-0.604303	0.00044269	1	1.07488	down
Com_32227_neg	Cetirizine N-oxide	C21 H25 Cl N2 O4	404.148	9.168	403.141	Invalid mass	No results	No results	0.546608	-0.871422	0.00044388	1	1.04111	down
Com_8787_neg	Eleutheroside E	C34 H46 O18	742.269	8.74	741.263	No results	Full match	Full match	4.34301	2.1187	0.00045961	1	1.10339	up
Com_11592_neg	3-Methyladipic acid	C7 H12 O4	160.074	8.602	159.067	No results	No results	Full match	0.593376	-0.752981	0.000474775	1	1.10598	down
Com_13336_neg	1-[(1R,2S,3R,5R)-5-Cyclohexyl-2,3-dihydroxycyclopentyl]-3-ethylurea	C14 H26 N2 O3	632.393	11.65	631.385	Invalid mass	No results	No results	1.75722	0.813293	0.000483095	0.972222	1.05244	up
Com_10340_neg	Smyrindioloside	C20 H24 O10	424.137	8.297	423.132	No results	No results	Full match	0.568186	-0.815564	0.000488422	1	1.01983	down
Com_1805_neg	Phlorizin	C21 H24 O10	436.137	9.356	435.13	No results	No results	Full match	0.598583	-0.740377	0.00052098	1	1.09584	down
Com_10014_neg	Toosendanin	C30 H38 O11	574.244	9.706	555.226	No results	No results	Full match	0.556225	-0.846261	0.00052797	1	1.06803	down
Com_4518_neg	N-{6-[4-(tert-butyl)phenoxy]-3-pyridinyl}-4-(trifluoromethyl)benzamide	C23 H21 F3 N2 O2	414.153	9.383	413.146	Invalid mass	No results	No results	0.20446	-2.29011	0.000535674	1	1.11163	down
Com_3693_neg	Ligustroflavone	C33 H40 O18	724.223	9.49	723.216	No results	No results	Full match	1.68851	0.755749	0.000550031	1	1.05992	up
Com_14232_neg	2-chloro-6-[(2-oxoazepan-3-yl)amino]benzonitrile	C13 H14 Cl N3 O	263.08	3.191	262.073	Invalid mass	No results	No results	0.440814	-1.18176	0.000606858	1	1.08517	down
Com_8757_neg	Tricin 5-O-hexosyl-O-hexoside	C29 H34 O17	654.18	9.261	653.172	No results	No results	Full match	1.60501	0.682585	0.000735357	1	1.06025	up
Com_28569_neg	Lithospermic acid	C27 H22 O12	538.114	9.069	537.106	No results	No results	Full match	0.23959	-2.06136	0.000759692	1	1.00619	down
Com_21692_neg	Testosterone sulfate	C19 H28 O5 S	368.169	6.92	367.162	Invalid mass	No results	No results	4.03685	2.01323	0.000772304	1	1.07581	up
Com_28345_neg	4-((5-(4-Nitrophenyl)oxazol-2-yl)amino)benzonitrile	C16 H10 N4 O3	306.078	5.143	305.071	Invalid mass	No results	No results	0.596376	-0.745706	0.000844402	1	1.03485	down
Com_27454_neg	L-Tryptophan	C11 H12 N2 O2	204.09	4.116	203.083	No results	No results	Full match	2.06151	1.0437	0.000869208	1	1.08622	up
Com_26963_neg	Hastatoside	C17 H24 O11	450.138	7.221	449.132	No results	Invalid mass	No results	1.90261	0.927978	0.000950212	0.972222	1.03503	up
Com_18380_neg	Epimedin A	C39 H50 O20	838.291	8.179	837.283	No results	No results	Full match	0.556086	-0.84662	0.00110892	1	1.00338	down
Com_11141_neg	LPC(1-acyl 18:2)	C26 H50 N O7 P	519.333	14.781	518.326	No results	No results	Full match	0.33295	-1.58662	0.00111134	0.944444	1.00322	down
Com_16581_neg	Mangiferin	C19 H18 O11	422.086	7.163	421.079	No results	No results	Full match	0.187672	-2.41372	0.0011509	1	1.08352	down
Com_5484_neg	pteroside A	C21 H30 O8	410.195	11.789	409.187	No results	No results	Full match	0.618563	-0.693008	0.00118787	1	1.00923	down
Com_23929_neg	alpha-Zearalanol	C18 H26 O5	322.178	10.242	321.171	No results	No results	Full match	2.09334	1.0658	0.00124134	1	1.01414	up
Com_9698_neg	LPA 16:1	C19 H37 O7 P	408.228	14.395	407.221	No results	Full match	No results	1.58426	0.663811	0.00132105	1	1.04594	up
Com_5237_neg	D-Phenylalanine	C9 H11 N O2	165.079	1.318	202.027	No results	No results	Full match	0.343038	-1.54356	0.00136528	1	1.0666	down
Com_447_neg	Methylenesuccinic acid	C5 H6 O4	130.027	1.19	129.02	No results	No results	Full match	3.54186	1.82451	0.00138281	1	1.07139	up
Com_22577_neg	Sennoside B	C42 H38 O20	862.194	7.834	861.187	No results	No results	Full match	0.619032	-0.691914	0.00144412	0.972222	1.03675	down
Com_5700_neg	3,4,5-Trimethoxycinnamic acid	C12 H14 O5	238.085	8.941	237.077	No results	No results	Full match	0.428508	-1.22261	0.00151578	1	1.05964	down
Com_2609_neg	Cnidioside A	C17 H20 O9	368.113	6.641	367.106	Invalid mass	No results	No results	1.57214	0.652729	0.00242162	0.972222	1.03038	up
Com_22139_neg	Benzoyleneurea	C8 H6 N2 O2	162.043	7.036	161.036	No results	No results	Full match	0.606219	-0.72209	0.00266417	1	1.02953	down
Com_16335_neg	11-Dehydro thromboxane B2	C20 H32 O6	736.442	13.426	735.434	Invalid mass	No results	No results	0.30178	-1.72843	0.00285569	1	1.03232	down
Com_7772_neg	N'2-benzylidene-5-hex-1-ynylfuran-2-carbohydrazide	C18 H18 N2 O2	294.132	5.663	293.125	Invalid mass	No results	No results	0.640249	-0.643296	0.00345612	1	1.0021	down
